# Supplementary material for: Oil carbon intensity impacts of COVID-19 and other short-term demand shocks
Source: Research Square preprint supplement (doi:10.21203/rs.3.rs-113456/v1), 2020-12-01
Supplement: Supplementary file 1 [file 7884a2e4c2a179bd564405b7.xlsx]

## Sheet: Cover page
Oil carbon intensity impacts of COVID-19 and other short-term demand shocks
Mohammad S. Masnadi1*, Giacomo Benini2, Alice Milivinti3, James E. Anderson4, Timothy J. Wallington4, Robert De Kleine4, Valerio Dotti5, Patrick Jochem6, Hassan El-Houjeiri7, Adam R. Brandt2*
1 Department of Chemical & Petroleum Engineering, University of Pittsburgh, PA, USA
2 Department of Energy Resources Engineering, Stanford University, CA, USA
3 Center for Population Health Sciences, School of Medicine, Stanford University, CA, USA
4 Research & Advanced Engineering, Ford Motor Company, MI, USA
5 Department of Economics, Washington University in St. Louis, MO, USA
6 Department of Energy System Analysis, Institute of Engineering Thermodynamics, Germany
7 Climate and Sustainability Group, Aramco Research Center – Detroit, MI, USA
* m.masnadi@pitt.edu, abrandt@stanford.edu

## Sheet: Field-level data
Field ID	Country	Year	Shadow price, $/bb	Oil price, $/bbl	Mrginal cost of production, $/bbl	Carbon intensity, kg CO2eq./bbl	Annual production, mmbbl/y	Flaring-to-oil ratio, scf/bbl	API	Shore	Geology
1	Nigeria	2015	46.1418	53.0296	6.88774	30.2168	0.49	132.208	50	Shallow water	Light & Medium
2	Gabon	2015	48.1674	52.3343	4.16686	82.6278	1.73	648.093	32.6	Onshore	Light & Medium
3	Nigeria	2015	44.719	53.0296	8.31058	403.439	2.96	4568.87	47	Onshore	Light & Medium
4	Nigeria	2015	54.6327	53.0296	0	37.9342	9.12	218.756	14	Shallow water	Heavy
5	Nigeria	2015	46.199	53.0296	6.83058	44.8861	0.27	315.006	36	Shallow water	Light & Medium
6	Egypt	2015	41.6774	48.5316	6.85425	52.4139	0.84	378.303	31.5	Shallow water	Light & Medium
7	Tunisia	2015	47.4342	52.3256	4.8914	94.6556	0.8	766.493	32	Onshore	Light & Medium
8	Gabon	2015	45.5233	52.3343	6.81102	77.8372	0.64	648.093	24.5	Shallow water	Light & Medium
9	Nigeria	2015	34.5159	53.0296	18.5137	50.2593	1.22	71.5884	22	Onshore	Heavy
10	Gabon	2015	45.3428	52.3343	6.99147	48.6504	6.67	256.18	31	Onshore	Light & Medium
11	Gabon	2015	45.3087	52.3343	7.0256	77.8751	2.1	648.093	25	Shallow water	Light & Medium
12	Gabon	2015	45.2492	52.3343	7.08503	76.8605	0.73	648.093	28	Shallow water	Light & Medium
13	Gabon	2015	49.2416	52.3343	3.0927	63.5149	0.42	648.093	28.4	Onshore	Light & Medium
14	Cameroon	2015	49.3016	52.7079	3.40628	71.6523	0.13	498.15	30	Onshore	Light & Medium
15	Egypt	2015	16.8291	48.5316	31.7025	59.754	1.44	378.303	20	Onshore	Heavy
16	Gabon	2015	44.9844	52.3343	7.34984	81.5306	2.85	648.093	40	Onshore	Light & Medium
17	Nigeria	2015	50.0883	53.0296	2.94124	209.423	1	1818.43	37	Onshore	Light & Medium
18	Gabon	2015	45.5686	52.3343	6.76571	76.5429	0.33	648.093	34.5	Shallow water	Light & Medium
19	Gabon	2015	48.4274	52.3343	3.90687	81.6899	0.38	648.093	47	Onshore	Light & Medium
20	Tunisia	2015	49.7872	52.3256	2.53842	93.0551	0.01	766.493	41	Onshore	Light & Medium
21	Egypt	2015	41.3911	48.5316	7.14053	52.6577	1.46	378.303	33	Shallow water	Light & Medium
22	Tunisia	2015	44.1355	53.1561	9.02055	91.2444	0.58	766.493	44	Onshore	Light & Medium
23	Gabon	2015	46.3144	52.3343	6.01988	44.8468	3.28	206.46	31	Onshore	Light & Medium
24	Gabon	2015	44.2665	52.3343	8.06782	42.8691	0.82	170.78	33	Onshore	Light & Medium
25	Gabon	2015	45.4178	52.3343	6.91646	77.6991	1.28	648.093	26	Shallow water	Light & Medium
26	Nigeria	2015	64.3868	53.0296	0	53.7321	5.26	325.976	36.4882	Onshore	Other Oil
27	Nigeria	2015	42.8524	53.0296	10.1772	110.237	0.87	315.006	36.4882	Onshore	Other Oil
28	Gabon	2015	45.4819	52.3343	6.85238	73.4179	0.22	648.093	32.6	Shallow water	Light & Medium
29	China	2015	45.6443	52.7911	7.14683	27.3954	3.65	46.593	45	Shallow water	Light & Medium
30	China	2015	6.6316	52.7911	46.1595	28.6738	3.65	46.593	36.4882	Shallow water	Other Oil
31	Malaysia	2015	46.6957	53.4859	6.79023	62.2615	0.89	519.859	38	Shallow water	Light & Medium
32	China	2015	45.8092	52.7911	6.98186	28.7	7.1	46.593	31	Shallow water	Light & Medium
33	Indonesia	2015	49.1968	53.5135	4.31669	57.1766	0.78	340.765	42.5	Onshore	Light & Medium
34	Vietnam	2015	46.497	53.4016	6.90454	44.3651	0.32	274.564	38	Shallow water	Light & Medium
35	Pakistan	2015	50.8998	53.4292	2.52931	62.9593	0.11	488.119	42	Onshore	Light & Medium
36	Pakistan	2015	50.4349	53.4292	2.99423	68.8818	0.18	488.119	47	Onshore	Light & Medium
37	Indonesia	2015	49.8486	53.453	3.60437	51.7406	0.11	340.765	38	Onshore	Light & Medium
38	China	2015	45.8668	52.7911	6.92432	28.5343	4.45	46.593	31	Shallow water	Light & Medium
39	China	2015	46.0324	52.7911	6.75874	25.6422	0.73	46.593	30	Shallow water	Light & Medium
40	Germany	2015	47.5007	51.6059	4.10514	31.8278	1.32	1.81115	37	Onshore	Light & Medium
41	Colombia	2015	36.8964	49.671	12.7746	35.9451	2.35	78.8339	8	Onshore	Heavy
42	Argentina	2015	31.499	47.6768	16.1778	37.7936	0.03	98.4733	48	Onshore	Shale & Tight Oil
43	Brazil	2015	45.1766	52.2439	7.06728	28.4792	20.75	50.8468	34	Shallow water	Light & Medium
44	Colombia	2015	41.458	49.671	8.21298	35.5823	0.43	78.8339	12	Onshore	Heavy
45	Argentina	2015	42.6126	47.6768	5.06417	37.1491	1.73	98.4733	25	Onshore	Light & Medium
46	Venezuela	2015	29.1044	47.4576	18.3532	59.7049	1.46	343.775	19	Shallow water	Heavy
47	Colombia	2015	41.4031	49.671	8.26787	36.9981	1.23	78.8339	37	Onshore	Light & Medium
48	Brazil	2015	44.4407	50.9129	6.47224	25.6591	6.34	50.8468	15	Deepwater	Heavy
49	Brazil	2015	42.3733	50.9129	8.53958	131.307	26.46	50.8468	14.5	Shallow water	Heavy
50	Colombia	2015	46.846	49.671	2.82495	37.7859	0.26	78.8339	37.3	Onshore	Light & Medium
51	Colombia	2015	-2.74009	49.671	52.4111	35.6838	0.46	78.8339	12	Onshore	Heavy
52	Brazil	2015	23.17	50.9129	27.7429	25.2827	1.78	50.8468	28	Deepwater	Light & Medium
53	Brazil	2015	65.0053	50.9129	0	25.8518	4.1	50.8468	21	Shallow water	Heavy
54	Venezuela	2015	40.682	47.4576	6.77563	52.2119	11.4	343.775	24	Shallow water	Light & Medium
55	Iraq	2015	44.1194	47.7899	3.67042	67.5522	10	389.172	34	Onshore	Light & Medium
56	United States	2015	37.868	51.7486	13.8806	37.0441	2.12	90.267	28.0793	Onshore	Shale & Tight Oil
57	United States	2015	44.0357	51.7486	7.71288	36.3955	2.21	90.267	28.0793	Onshore	Shale & Tight Oil
58	United States	2015	37.9042	51.7486	13.8443	36.2373	0.6	90.267	28.0793	Onshore	Shale & Tight Oil
59	United States	2015	41.4048	52.6125	11.2077	36.7144	0.26	90.267	28.0793	Onshore	Shale & Tight Oil
60	United States	2015	50.7888	52.6125	1.82368	35.5396	5.21	90.267	28.0793	Onshore	Shale & Tight Oil
61	United States	2015	40.584	52.6125	12.0285	37.0444	3.22	90.267	28.0793	Onshore	Shale & Tight Oil
62	United States	2015	48.8799	52.6125	3.7326	37.0466	2.63	90.267	36.4882	Onshore	Other Oil
63	United States	2015	38.8314	52.6125	13.7811	37.0849	0.06	90.267	36.4882	Onshore	Other Oil
64	United States	2015	61.173	52.2343	0	36.2427	0.8	90.267	36.4882	Onshore	Other Oil
65	United States	2015	47.9127	51.408	3.49528	37.0423	1.16	90.267	36.4882	Onshore	Other Oil
66	United States	2015	39.7961	51.408	11.6119	37.147	0.05	90.267	36.4882	Onshore	Other Oil
67	United States	2015	45.3347	51.408	6.07335	36.1024	0.16	90.267	36.4882	Onshore	Other Oil
68	United States	2015	48.4824	51.408	2.92563	37.044	0.5	90.267	36.4882	Onshore	Other Oil
69	United States	2015	46.044	51.408	5.36406	37.0551	0.1	90.267	36.4882	Onshore	Other Oil
70	United States	2015	49.4094	50.9713	1.5619	37.0445	1.38	90.267	36.4882	Onshore	Other Oil
71	United States	2015	41.9175	51.7486	9.83107	44.4538	5.07	90.267	36.4882	Onshore	Other Oil
72	United States	2015	40.4695	51.408	10.9385	35.5447	0.75	90.267	28.0793	Onshore	Shale & Tight Oil
73	United States	2015	45.5087	51.5083	5.99962	35.2831	2.26	90.267	28.0793	Onshore	Shale & Tight Oil
74	United States	2015	76.2902	51.5083	0	35.2819	1.04	90.267	28.0793	Onshore	Shale & Tight Oil
75	United States	2015	37.6998	51.5083	13.8085	35.282	4.65	90.267	28.0793	Onshore	Shale & Tight Oil
76	United States	2015	38.3864	52.6125	14.2261	35.5869	0.09	90.267	28.0793	Onshore	Shale & Tight Oil
77	United States	2015	58.0304	52.6125	0	35.5423	0.69	90.267	28.0793	Onshore	Shale & Tight Oil
78	United States	2015	40.2025	52.6125	12.41	35.8099	1.11	90.267	28.0793	Onshore	Shale & Tight Oil
79	United States	2015	39.8598	52.6125	12.7527	35.8081	6.2	90.267	28.0793	Onshore	Shale & Tight Oil
80	United States	2015	42.5683	52.6125	10.0442	35.5381	6.75	90.267	28.0793	Onshore	Shale & Tight Oil
81	United States	2015	37.6018	52.6125	15.0107	35.9426	0.42	90.267	28.0793	Onshore	Shale & Tight Oil
82	United States	2015	47.7558	52.6125	4.85675	36.0924	12.49	90.267	28.0793	Onshore	Shale & Tight Oil
83	United States	2015	37.5914	51.408	13.8166	35.8081	0.86	90.267	36.4882	Onshore	Other Oil
84	United States	2015	45.5532	52.6728	7.11959	36.7097	2.29	90.267	36.4882	Onshore	Other Oil
85	United States	2015	39.3448	52.6125	13.2677	35.5385	3.83	90.267	28.0793	Onshore	Shale & Tight Oil
86	United States	2015	37.4316	52.6125	15.1809	35.276	0.68	90.267	28.0793	Onshore	Shale & Tight Oil
87	United States	2015	45.1073	52.6125	7.50516	35.8084	1.55	90.267	28.0793	Onshore	Shale & Tight Oil
88	United States	2015	36.4274	52.6125	16.1852	35.5727	0.03	90.267	28.0793	Onshore	Shale & Tight Oil
89	United States	2015	36.5998	52.6125	16.0127	35.839	0.38	90.267	28.0793	Onshore	Shale & Tight Oil
90	United States	2015	36.7564	52.6125	15.8562	35.6791	0.55	90.267	28.0793	Onshore	Shale & Tight Oil
91	United States	2015	38.2307	52.6125	14.3818	35.5377	4.74	90.267	28.0793	Onshore	Shale & Tight Oil
92	United States	2015	40.5062	51.408	10.9018	35.6713	4.1	90.267	28.0793	Onshore	Shale & Tight Oil
93	United States	2015	37.0664	51.408	14.3416	35.5403	1.13	90.267	28.0793	Onshore	Shale & Tight Oil
94	Australia	2015	46.3207	53.1828	6.86212	45.9127	0.55	285.797	32.1	Shallow water	Light & Medium
95	New Zealand	2015	51.3248	53.9296	2.60479	48.6842	0.29	248.732	53	Onshore	Light & Medium
96	Australia	2015	49.4617	53.1191	3.65738	52.1514	0.14	285.797	39	Onshore	Light & Medium
97	Australia	2015	39.4794	53.0146	13.5352	44.5151	2.35	285.797	19.1	Shallow water	Heavy
98	Russian Federation	2015	47.575	51.0493	3.47429	49.2006	0.13	187.195	49	Onshore	Light & Medium
99	Brazil	2015	49.8479	52.2439	2.39599	30.7784	66.47	50.8468	30	Ultra-deepwater	Light & Medium
100	China	2015	25.4095	51.6016	26.1921	37.35	47.45	46.593	19	Onshore	Heavy
101	Iraq	2015	42.1736	47.7899	5.61627	61.514	52.97	389.172	25	Onshore	Light & Medium
102	Iraq	2015	36.2448	47.7899	11.5451	65.9602	42.42	389.172	38	Onshore	Light & Medium
103	Cote d'Ivoire	2015	39.0518	52.215	13.1632	34.9967	6.42	178.58	23	Deepwater	Light & Medium
104	Venezuela	2015	40.2407	47.4576	7.21687	57.4495	7.3	343.775	23	Onshore	Light & Medium
105	United States	2015	29.8806	49.2263	19.3456	137.056	24.96	0.861731	13.5598	Onshore	Extra Heavy
106	Colombia	2015	39.0107	49.671	10.6602	37.2205	0.72	78.8339	36.4882	Onshore	Other Oil
107	Colombia	2015	47.1665	49.671	2.50449	37.2205	0.85	78.8339	40	Onshore	Light & Medium
108	Iran	2015	40.6518	49.1675	8.5157	45.5921	0.93	200.39	36.4882	Onshore	Other Oil
109	United States	2015	44.108	51.7486	7.64056	46.5706	12.39	140	28.0793	Onshore	Shale & Tight Oil
110	United States	2015	41.399	51.7486	10.3496	46.5706	7.73	140	28.0793	Onshore	Shale & Tight Oil
111	United States	2015	41.6809	51.7486	10.0677	46.5706	8.63	140	28.0793	Onshore	Shale & Tight Oil
112	United States	2015	44.6794	51.7486	7.06912	46.5706	17.91	140	28.0793	Onshore	Shale & Tight Oil
113	United States	2015	38.7252	51.7486	13.0234	46.5706	1.4	140	28.0793	Onshore	Shale & Tight Oil
114	United States	2015	47.0665	51.7486	4.68203	46.5706	29.87	140	28.0793	Onshore	Shale & Tight Oil
115	United States	2015	46.3495	51.7486	5.39904	46.5706	13.02	140	28.0793	Onshore	Shale & Tight Oil
116	United States	2015	40.8986	51.7486	10.85	46.5706	2.42	140	28.0793	Onshore	Shale & Tight Oil
117	United States	2015	40.6102	51.7486	11.1384	46.5706	2.6	140	28.0793	Onshore	Shale & Tight Oil
118	United States	2015	44.8235	51.7486	6.9251	46.5706	3.63	140	28.0793	Onshore	Shale & Tight Oil
119	United States	2015	36.4727	51.7486	15.2758	46.5706	0.61	140	28.0793	Onshore	Shale & Tight Oil
120	United States	2015	53.1547	51.7486	0	46.5706	2.04	140	28.0793	Onshore	Shale & Tight Oil
121	United States	2015	45.4415	51.7486	6.30705	46.5706	0.46	140	28.0793	Onshore	Shale & Tight Oil
122	United States	2015	43.9284	51.7486	7.82018	46.5706	0.63	140	28.0793	Onshore	Shale & Tight Oil
123	United States	2015	52.1374	51.7486	0	46.5706	0.12	140	28.0793	Onshore	Shale & Tight Oil
124	United States	2015	50.5855	51.7486	1.16304	46.5706	13.26	140	28.0793	Onshore	Shale & Tight Oil
125	United States	2015	86.2922	51.7486	0	46.5706	0.31	140	28.0793	Onshore	Shale & Tight Oil
126	United States	2015	71.5292	51.7486	0	46.5706	3.77	140	28.0793	Onshore	Shale & Tight Oil
127	United States	2015	40.0593	51.7486	11.6893	46.5706	1.88	140	28.0793	Onshore	Shale & Tight Oil
128	United States	2015	64.9627	51.7486	0	46.5706	2.16	140	28.0793	Onshore	Shale & Tight Oil
129	United States	2015	37.5359	51.408	13.8721	96.1087	0.28	90.267	28.0793	Onshore	Shale & Tight Oil
130	United States	2015	36.9563	51.408	14.4517	96.1087	1.38	90.267	28.0793	Onshore	Shale & Tight Oil
131	United States	2015	37.8871	51.408	13.5209	96.1087	4.08	90.267	28.0793	Onshore	Shale & Tight Oil
132	United States	2015	43.9343	52.6125	8.67821	35.5362	3.07	90.267	28.0793	Onshore	Shale & Tight Oil
133	Nigeria	2015	50.3002	53.0296	2.7293	120.147	0.59	995.126	47	Onshore	Light & Medium
134	Nigeria	2015	46.2718	53.0296	6.75775	101.587	19.15	895.78	33.5	Shallow water	Light & Medium
135	Nigeria	2015	50.5848	53.0296	2.44475	152.778	0.26	1478.21	22.5	Onshore	Light & Medium
136	Nigeria	2015	50.0994	53.0296	2.93013	52.38	1.1	315.006	43	Onshore	Light & Medium
137	Nigeria	2015	50.0472	53.0296	2.98238	46.4965	17.63	239.328	27.95	Onshore	Light & Medium
138	Nigeria	2015	50.1848	53.0296	2.84471	108.054	10.65	833.147	35	Onshore	Light & Medium
139	Nigeria	2015	50.3483	53.0296	2.68127	53.5519	6.56	82.9942	33.3	Onshore	Light & Medium
140	Nigeria	2015	48.0781	53.0296	4.95145	122.073	0.33	1116.13	22.25	Onshore	Heavy
141	Egypt	2015	46.1423	51.3803	5.23806	60.5676	3.03	378.303	40	Onshore	Light & Medium
142	Nigeria	2015	50.5048	53.0296	2.52476	66.9505	6.54	377.257	33	Onshore	Light & Medium
143	Nigeria	2015	50.5017	53.0296	2.52783	108.574	7.56	905.623	31.8	Onshore	Light & Medium
144	Tunisia	2015	48.002	53.1561	5.15413	37.5317	1.11	118.965	40	Onshore	Light & Medium
145	Egypt	2015	18.4799	48.5316	30.0517	60.0362	3.2	378.303	22	Onshore	Heavy
146	Cameroon	2015	45.8329	52.5436	6.71065	115.336	18.25	1125.27	30	Shallow water	Light & Medium
147	Gabon	2015	45.2388	52.3343	7.09552	81.5088	1.61	648.093	35.5	Onshore	Light & Medium
148	Nigeria	2015	50.469	53.0296	2.56051	65.5594	4.38	420.142	32.1	Onshore	Light & Medium
149	Gabon	2015	45.501	52.3343	6.83325	72.8634	2.08	648.093	29.8	Shallow water	Light & Medium
150	Tunisia	2015	45.3834	52.3256	6.94219	78.6216	0.63	766.493	43	Shallow water	Light & Medium
151	Nigeria	2015	49.8427	53.0296	3.18685	60.4587	2.92	353.967	33.55	Onshore	Light & Medium
152	Nigeria	2015	46.2728	53.0296	6.75679	108.928	2.83	1010.41	37	Shallow water	Light & Medium
153	Nigeria	2015	50.3618	53.0296	2.66771	72.1988	2.62	280.659	40	Onshore	Light & Medium
154	Nigeria	2015	50.0817	53.0296	2.94788	64.6062	10.14	386.084	32.45	Onshore	Light & Medium
155	Cameroon	2015	45.6977	52.5436	6.84588	113.941	2.14	1125.27	28	Shallow water	Light & Medium
156	Tunisia	2015	45.4814	52.3256	6.84415	87.8157	0.4	766.493	27.4	Shallow water	Light & Medium
157	Tunisia	2015	49.1419	53.1561	4.01416	83.5258	0.21	596.49	46	Onshore	Light & Medium
158	Nigeria	2015	50.5121	53.0296	2.51742	64.495	0.92	377.888	26	Onshore	Light & Medium
159	Egypt	2015	41.4694	48.5316	7.06222	59.2817	0.55	378.303	36.4882	Onshore	Other Oil
160	Egypt	2015	41.7454	48.5316	6.78622	53.4756	0.27	378.303	33	Shallow water	Light & Medium
161	Nigeria	2015	50.6102	53.0296	2.41938	114.825	0.72	907.812	41.2	Onshore	Light & Medium
162	Nigeria	2015	46.2985	53.0296	6.73109	45.2641	10.15	167.848	31.3	Shallow water	Light & Medium
163	Cote d'Ivoire	2015	45.3823	52.215	6.83273	41.963	6.02	226.91	32	Shallow water	Light & Medium
164	Nigeria	2015	46.9418	53.0296	6.08778	55.6735	5.85	315.006	19	Onshore	Heavy
165	Gabon	2015	45.5649	52.3343	6.7694	78.9705	0.27	648.093	25	Shallow water	Light & Medium
166	Gabon	2015	45.455	52.3343	6.87924	77.203	0.7	648.093	24	Shallow water	Light & Medium
167	Tunisia	2015	49.7995	53.1561	3.35662	84.8668	0.81	766.493	42	Onshore	Light & Medium
168	Egypt	2015	41.2563	48.5316	7.27537	62.6431	1.02	378.303	12	Onshore	Heavy
169	Nigeria	2015	50.5402	53.0296	2.48937	182.789	0.57	1844.52	33	Onshore	Light & Medium
170	Gabon	2015	32.5597	52.3343	19.7745	89.3972	1.31	648.093	17	Onshore	Heavy
171	Nigeria	2015	50.6359	53.0296	2.39369	160.041	0.82	954.045	27.85	Onshore	Light & Medium
172	Egypt	2015	41.7727	48.5316	6.75889	52.0594	0.07	378.303	29	Shallow water	Light & Medium
173	Nigeria	2015	50.4801	53.0296	2.54947	58.7025	9.09	352.567	27.6	Onshore	Light & Medium
174	Gabon	2015	45.5432	52.3343	6.79107	75.931	0.75	648.093	33.6	Shallow water	Light & Medium
175	Gabon	2015	46.2801	52.3343	6.05423	57.4573	1.86	353.24	33	Onshore	Light & Medium
176	Nigeria	2015	46.232	53.0296	6.79754	39.4653	2.5	215.542	36	Shallow water	Light & Medium
177	Nigeria	2015	48.5827	53.0296	4.44685	124.875	7.49	1054.75	33.45	Onshore	Light & Medium
178	Nigeria	2015	50.4105	53.0296	2.61904	52.2024	0.8	315.006	38	Onshore	Light & Medium
179	Nigeria	2015	50.3571	53.0296	2.67245	187.35	1.03	990.536	30	Onshore	Light & Medium
180	Nigeria	2015	50.096	53.0296	2.93355	633.154	1.32	7355.33	46.78	Onshore	Light & Medium
181	Cameroon	2015	4.33407	52.5436	48.2095	78.3781	2.27	1125.27	36.4882	Shallow water	Other Oil
182	Gabon	2015	46.7157	52.3343	5.61855	36.6003	5.69	103.766	32	Onshore	Light & Medium
183	Egypt	2015	41.7306	48.5316	6.80106	54.261	0.42	378.303	34.25	Shallow water	Light & Medium
184	Nigeria	2015	50.4421	53.0296	2.58748	78.6649	4.27	315.006	30	Onshore	Light & Medium
185	India	2015	50.4667	53.27	2.80328	48.5127	1.82	243.064	42.5	Onshore	Light & Medium
186	Indonesia	2015	50.3192	53.5135	3.19425	58.6479	0.91	340.765	31	Onshore	Light & Medium
187	China	2015	48.1217	51.6016	3.47985	33.9937	34.41	41.219	38	Onshore	Light & Medium
188	Indonesia	2015	49.4439	52.4067	2.9628	169.458	102.33	210.842	25	Onshore	Light & Medium
189	Indonesia	2015	49.0558	51.6447	2.58885	52.3061	0.51	291.335	35	Onshore	Light & Medium
190	Indonesia	2015	50.8569	53.5135	2.6566	68.3881	3.01	340.765	42	Onshore	Light & Medium
191	Malaysia	2015	46.7621	53.4859	6.72381	55.2457	7.42	519.859	39.5	Shallow water	Light & Medium
192	Malaysia	2015	4.68769	53.4982	48.8105	64.1972	4.56	519.859	36.4882	Shallow water	Other Oil
193	China	2015	48.8328	52.7193	3.88652	38.2177	36.86	46.593	35.7	Onshore	Light & Medium
194	Vietnam	2015	46.7635	53.4016	6.63804	45.3269	33.92	274.564	38	Shallow water	Light & Medium
195	Indonesia	2015	50.9525	53.453	2.50047	60.1595	5.48	340.765	36.5	Onshore	Light & Medium
196	China	2015	47.8148	51.8888	4.07398	36.9928	41.24	46.593	37	Onshore	Light & Medium
197	China	2015	48.3694	53.043	4.67351	41.0767	2.56	46.593	32	Onshore	Light & Medium
198	China	2015	53.8157	52.2051	0	32.8094	183.23	46.593	36	Onshore	Other Oil
199	Malaysia	2015	46.5892	53.4982	6.909	60.4555	2.56	519.859	36	Shallow water	Light & Medium
200	Malaysia	2015	46.2654	53.4859	7.22053	63.6379	4.74	519.859	40	Shallow water	Light & Medium
201	Indonesia	2015	46.3386	52.622	6.28342	62.0572	25.51	252.05	36.4882	Onshore	Other Oil
202	Indonesia	2015	49.5359	52.4067	2.87083	59.6553	0.46	340.765	30.85	Onshore	Light & Medium
203	Indonesia	2015	46.8199	53.453	6.6331	52.1962	25.64	340.765	42	Shallow water	Light & Medium
204	Malaysia	2015	46.7386	53.4859	6.74732	128.506	0.33	519.859	45.5	Shallow water	Light & Medium
205	Indonesia	2015	47.9866	54.7119	6.72522	50.0666	14.2	340.765	43	Shallow water	Light & Medium
206	Indonesia	2015	49.575	52.4067	2.83175	65.6117	4.84	340.765	37	Onshore	Light & Medium
207	Thailand	2015	47.1259	52.8585	5.73257	38.0392	2.05	86.5335	35	Onshore	Light & Medium
208	Indonesia	2015	49.0827	51.9057	2.82291	58.6895	0.09	340.765	23.7	Onshore	Light & Medium
209	Thailand	2015	48.5567	53.2032	4.64644	39.3633	0.22	86.5335	36.5	Onshore	Light & Medium
210	Thailand	2015	46.4432	53.2032	6.75992	38.2472	0.32	86.5335	34.5	Onshore	Light & Medium
211	Malaysia	2015	46.7193	53.4859	6.76666	57.3462	9.16	519.859	38	Shallow water	Light & Medium
212	Indonesia	2015	50.2322	53.453	3.22073	82.9206	2.96	296.007	34	Onshore	Light & Medium
213	Vietnam	2015	46.5567	53.3219	6.76523	111.014	0.15	274.564	38	Shallow water	Light & Medium
214	China	2015	47.7925	54.5477	6.75523	34.9658	0.5	46.593	40	Shallow water	Light & Medium
215	Indonesia	2015	48.9491	51.6447	2.69553	59.1344	1.81	340.765	34.3	Onshore	Light & Medium
216	Malaysia	2015	46.6489	53.4859	6.83699	62.9985	10.77	519.859	42	Shallow water	Light & Medium
217	Malaysia	2015	50.1911	53.4859	3.29478	65.8571	7.34	519.859	22	Shallow water	Heavy
218	China	2015	42.1376	53.1252	10.9876	39.7232	17.52	46.593	36.4882	Onshore	Other Oil
219	Vietnam	2015	46.6996	53.6594	6.95982	44.4173	8.76	274.564	35	Shallow water	Light & Medium
220	China	2015	47.6098	52.2051	4.5953	36.5511	92.71	46.593	36	Onshore	Light & Medium
221	China	2015	46.6968	51.8888	5.19203	34.2106	10.95	46.593	37	Onshore	Light & Medium
222	Malaysia	2015	46.7103	53.4982	6.78791	59.8668	17.19	519.859	37	Shallow water	Light & Medium
223	Malaysia	2015	46.7175	53.4982	6.78071	131.177	3.65	519.859	36	Shallow water	Light & Medium
224	Malaysia	2015	46.526	53.4982	6.97224	153.49	4.45	498.345	35	Shallow water	Light & Medium
225	Malaysia	2015	46.7394	53.4982	6.75886	63.4654	0.33	519.859	35	Shallow water	Light & Medium
226	Vietnam	2015	46.5299	53.4016	6.87162	43.7585	2.74	274.564	35	Shallow water	Light & Medium
227	Indonesia	2015	39.228	52.4067	13.1787	60.7494	0.5	340.765	36.4882	Onshore	Other Oil
228	Malaysia	2015	46.4949	53.4859	6.99104	64.4971	4.56	519.859	38	Shallow water	Light & Medium
229	China	2015	45.9556	52.7911	6.83548	28.0513	7.3	46.593	38	Shallow water	Light & Medium
230	China	2015	37.6588	52.1869	14.5281	39.6265	0.95	46.593	36.4882	Onshore	Other Oil
231	Malaysia	2015	6.13181	53.4859	47.3541	62.5724	8.87	519.859	36.4882	Shallow water	Other Oil
232	Indonesia	2015	46.5798	53.5135	6.93365	49.5069	0.38	340.765	43.5	Shallow water	Light & Medium
233	Vietnam	2015	46.4054	53.4016	6.99614	44.2341	4.2	274.564	37	Shallow water	Light & Medium
234	Indonesia	2015	47.4523	54.215	6.76264	48.9903	1.06	340.765	45	Shallow water	Light & Medium
235	Indonesia	2015	50.6593	53.5135	2.85412	57.2242	1.88	340.765	37	Onshore	Light & Medium
236	Indonesia	2015	49.441	53.0737	3.63277	62.7602	0.64	340.765	32	Onshore	Light & Medium
237	Indonesia	2015	45.8393	52.622	6.78274	46.2222	5.05	340.765	47	Shallow water	Light & Medium
238	Indonesia	2015	49.9875	53.5135	3.52593	42.8983	4.16	170.215	36	Onshore	Light & Medium
239	Indonesia	2015	46.7031	53.453	6.74986	51.1341	4.81	340.765	30.5	Shallow water	Light & Medium
240	Thailand	2015	45.216	52.2207	7.00462	35.6861	0.22	86.5335	27	Onshore	Light & Medium
241	Malaysia	2015	46.3947	53.4859	7.09118	62.7459	6.35	519.859	44.5	Shallow water	Light & Medium
242	Indonesia	2015	49.3358	52.4067	3.0709	61.018	0.14	340.765	31.9	Onshore	Light & Medium
243	China	2015	45.564	52.7911	7.22705	26.6158	11.24	46.593	35	Shallow water	Light & Medium
244	Indonesia	2015	49.8568	53.5135	3.65669	54.481	9.24	340.765	43.1	Onshore	Light & Medium
245	Pakistan	2015	49.5575	53.4292	3.87164	57.9469	7.1	488.119	47	Onshore	Light & Medium
246	Philippines	2015	46.0231	52.7939	6.77077	66.333	0.07	531.943	43.8	Shallow water	Light & Medium
247	Pakistan	2015	47.4467	53.4292	5.98246	62.4324	8.1	488.119	36.4882	Onshore	Other Oil
248	Thailand	2015	48.9306	53.2032	4.27257	39.5324	11.74	86.5335	40	Onshore	Light & Medium
249	Malaysia	2015	46.5835	53.4859	6.90244	63.1416	0.15	519.859	43	Shallow water	Light & Medium
250	Malaysia	2015	46.4691	53.4859	7.01685	64.2916	1.39	519.859	38	Shallow water	Light & Medium
251	China	2015	45.3286	52.7911	7.46248	25.0929	4.74	46.593	28.2	Shallow water	Light & Medium
252	China	2015	45.9051	52.7911	6.88604	25.3324	16.39	46.593	30	Shallow water	Light & Medium
253	Vietnam	2015	46.5681	53.4016	6.83348	44.2686	8.29	274.564	37	Shallow water	Light & Medium
254	Indonesia	2015	51.0976	53.5135	2.41588	56.0993	0.01	340.765	47.05	Onshore	Light & Medium
255	Indonesia	2015	42.125	52.4067	10.2817	54.9145	0.69	340.765	43	Onshore	Light & Medium
256	Indonesia	2015	44.1534	53.5135	9.36002	57.1315	0.42	340.765	36.4882	Onshore	Other Oil
257	Thailand	2015	48.1758	52.2207	4.04488	56.2536	0.15	86.5335	33	Onshore	Light & Medium
258	Vietnam	2015	46.517	53.3219	6.80493	44.6968	0.93	274.564	36	Shallow water	Light & Medium
259	Malaysia	2015	46.6942	53.4859	6.79168	63.1545	0.62	519.859	43	Shallow water	Light & Medium
260	Indonesia	2015	45.8356	52.622	6.78646	50.8803	0.33	340.765	36	Shallow water	Light & Medium
261	Vietnam	2015	46.6803	53.4016	6.72126	44.4333	25.93	274.564	36.5	Shallow water	Light & Medium
262	Indonesia	2015	45.805	52.622	6.81702	46.4979	2.52	340.765	35	Shallow water	Light & Medium
263	China	2015	45.9126	52.7911	6.8785	28.5491	6.66	46.593	35	Shallow water	Light & Medium
264	China	2015	45.9234	52.7911	6.86771	28.0779	11.02	46.593	37.4	Shallow water	Light & Medium
265	Indonesia	2015	27.0382	53.453	26.4147	46.9745	1.24	340.765	38	Deepwater	Light & Medium
266	China	2015	39.1248	52.2051	13.0803	34.3331	4.38	46.593	54	Onshore	Other Oil
267	Albania	2015	34.8846	40.2718	5.38715	41.5222	0.42	91.1096	24.5	Onshore	Light & Medium
268	Italy	2015	42.1967	48.4991	6.30242	34.311	28.32	1.6856	36.4882	Onshore	Other Oil
269	Italy	2015	37.7535	52.216	14.4625	33.8734	0.18	1.6856	36.4882	Onshore	Other Oil
270	Italy	2015	31.434	44.2421	12.8081	25.4058	2.67	1.6856	36.4882	Onshore	Other Oil
271	United Kingdom	2015	44.2569	51.0003	6.74337	110.423	2.69	568.647	36.5	Shallow water	Light & Medium
272	Colombia	2015	30.5723	49.5293	18.957	32.7904	1.95	33.3387	18.4	Onshore	Heavy
273	Colombia	2015	42.0338	49.671	7.63717	37.0922	0.88	78.8339	26	Onshore	Light & Medium
274	Brazil	2015	44.1853	50.9129	6.72765	27.216	11.87	50.6598	27	Shallow water	Light & Medium
275	Brazil	2015	49.388	53.1002	3.71221	38.1491	14.32	50.8468	42	Onshore	Light & Medium
276	Colombia	2015	41.3795	49.671	8.29142	36.612	5.94	78.8339	44	Onshore	Light & Medium
277	Brazil	2015	45.9665	50.9129	4.94643	24.5195	17.59	39.5473	19	Ultra-deepwater	Heavy
278	Brazil	2015	33.0649	50.9129	17.848	27.7709	8.67	50.8468	22	Shallow water	Heavy
279	Argentina	2015	31.5465	47.6768	16.1303	38.9796	0.09	98.4733	28.0793	Onshore	Shale & Tight Oil
280	Brazil	2015	65.7341	50.9129	0	32.2219	21.31	50.8468	29	Deepwater	Light & Medium
281	Brazil	2015	52.5366	50.9129	0	28.74	11.29	50.8468	25	Deepwater	Light & Medium
282	Colombia	2015	36.3325	49.671	13.3385	34.711	2.35	78.8339	27	Onshore	Light & Medium
283	Venezuela	2015	15.3329	47.4576	32.1247	164.015	8.28	343.775	21.5	Onshore	Heavy
284	Colombia	2015	42.8266	49.671	6.84438	36.2431	2.2	78.8339	24	Onshore	Light & Medium
285	Brazil	2015	43.8833	50.9129	7.02964	26.0512	5.87	50.8468	29	Deepwater	Light & Medium
286	Venezuela	2015	36.8128	47.4576	10.6448	48.9991	11.32	32.7441	36.4882	Onshore	Other Oil
287	Colombia	2015	45.0196	49.671	4.65141	36.8225	1.35	78.8339	32.8	Onshore	Light & Medium
288	Colombia	2015	41.5611	49.671	8.10987	36.7194	0.76	78.8339	13.8	Onshore	Heavy
289	Brazil	2015	44.1557	50.9129	6.75718	27.1358	8.36	50.8468	23.6	Shallow water	Light & Medium
290	Colombia	2015	43.2638	49.671	6.40719	37.6405	3.2	78.8339	34	Onshore	Light & Medium
291	Colombia	2015	43.0667	49.671	6.60431	36.5756	1.61	78.8339	29	Onshore	Light & Medium
292	Colombia	2015	34.922	49.5293	14.6073	48.8856	7.99	78.8339	21.5	Onshore	Heavy
293	Colombia	2015	40.387	49.671	9.28395	36.6081	0.52	78.8339	40	Onshore	Light & Medium
294	Venezuela	2015	40.9329	47.4576	6.52469	56.438	65.26	205.531	24	Shallow water	Light & Medium
295	Colombia	2015	24.7942	49.671	24.8768	35.5868	9.69	78.8339	16	Onshore	Heavy
296	Colombia	2015	39.6326	49.671	10.0384	37.1402	2.85	78.8339	39	Onshore	Light & Medium
297	Argentina	2015	31.8093	47.6768	15.8675	39.0021	0.3	98.4733	38	Onshore	Shale & Tight Oil
298	Colombia	2015	42.1437	49.671	7.52725	37.6904	1.5	78.8339	33.7	Onshore	Light & Medium
299	Colombia	2015	42.6521	49.671	7.01892	34.6478	6.14	73.7446	24	Onshore	Light & Medium
300	Colombia	2015	46.0893	49.671	3.58162	37.2475	0.26	78.8339	33.5	Onshore	Light & Medium
301	Venezuela	2015	44.4702	47.4576	2.98735	85.2084	2.1	343.775	35	Onshore	Light & Medium
302	Colombia	2015	39.5419	49.671	10.1291	35.8944	1.5	78.8339	32	Onshore	Light & Medium
303	Brazil	2015	36.3424	50.9129	14.5705	27.2328	8.17	50.8468	28	Deepwater	Light & Medium
304	Colombia	2015	46.5246	49.671	3.14636	37.5147	0.53	68.6282	33.4	Onshore	Light & Medium
305	Colombia	2015	46.8059	49.671	2.86505	36.5185	0.37	78.8339	22.45	Onshore	Light & Medium
306	Oman	2015	46.3454	51.9728	5.62738	50.6638	3.89	247.215	34	Onshore	Light & Medium
307	New Zealand	2015	47.0578	53.9296	6.8718	41.8988	1.66	248.732	45	Shallow water	Light & Medium
308	Australia	2015	45.8468	53.0146	7.16784	44.5602	1.97	285.797	45.6	Shallow water	Light & Medium
309	New Zealand	2015	51.2311	53.9296	2.69847	49.8443	0.04	248.732	37	Onshore	Light & Medium
310	New Zealand	2015	46.9266	53.9296	7.00296	42.672	4.49	248.732	34.6	Shallow water	Light & Medium
311	Australia	2015	46.811	53.7432	6.93214	44.8604	5.94	285.797	38.5	Shallow water	Light & Medium
312	Russian Federation	2015	38.9033	48.6004	9.6971	50.5707	2.7	165.503	36.4882	Onshore	Other Oil
313	Russian Federation	2015	44.4376	48.6004	4.1628	31.6629	0.56	37.0154	23	Onshore	Light & Medium
314	Russian Federation	2015	44.1524	48.6004	4.44795	47.2312	1.11	187.195	23.5	Onshore	Light & Medium
315	Russian Federation	2015	47.3562	51.0493	3.6931	42.5915	5.47	141.795	30.19	Onshore	Light & Medium
316	Russian Federation	2015	48.576	51.0493	2.47328	43.8298	0.72	183.599	28.65	Onshore	Light & Medium
317	Russian Federation	2015	39.9421	51.0493	11.1072	34.7787	0.28	68.8293	36.4882	Onshore	Other Oil
318	Russian Federation	2015	44.365	51.0493	6.6843	32.7629	5.42	66.4837	37.55	Onshore	Light & Medium
319	Kazakhstan	2015	45.2173	50.7894	5.57212	52.5541	0.57	214.167	46	Onshore	Light & Medium
320	Kazakhstan	2015	48.2501	53.4101	5.15995	52.918	3.61	214.167	31.33	Onshore	Light & Medium
321	Kazakhstan	2015	50.5845	52.9238	2.33928	45.1192	0.01	214.167	42	Onshore	Light & Medium
322	Nigeria	2015	50.4487	53.0296	2.58081	160.367	1.34	1584.71	36.6	Onshore	Light & Medium
323	Brazil	2015	42.3555	50.9129	8.55742	65.7576	67.52	50.8468	21	Deepwater	Heavy
324	Nigeria	2015	49.496	53.0296	3.53359	66.0141	36.5	388.969	31.5	Deepwater	Light & Medium
325	Peru	2015	45.9133	52.6983	6.78504	40.2226	1.42	194.179	30.5	Shallow water	Light & Medium
326	Brazil	2015	36.8085	51.508	14.6995	25.1505	7.39	50.8468	34	Deepwater	Light & Medium
327	Nigeria	2015	50.2759	53.0296	2.75366	148.038	4.74	1304.45	35	Onshore	Light & Medium
328	Nigeria	2015	49.7731	53.0296	3.25643	148.038	5.91	1304.45	37.19	Onshore	Light & Medium
329	Nigeria	2015	44.7858	53.0296	8.24372	75.973	2.74	532.629	17	Onshore	Heavy
330	Nigeria	2015	45.405	52.1638	6.75884	103.376	10.58	364.456	38.2	Shallow water	Light & Medium
331	Tunisia	2015	42.7351	49.4955	6.76035	90.8041	1.68	766.493	30	Shallow water	Light & Medium
332	Gabon	2015	43.8914	50.6585	6.7671	77.9146	0.44	648.093	36.6	Shallow water	Light & Medium
333	Angola	2015	45.3973	52.1746	6.77732	47.5799	1.12	221.742	39	Shallow water	Light & Medium
334	Mauritania	2015	50.3228	50.478	0.1552	87.5673	1.85	774.526	26.9	Deepwater	Light & Medium
335	Gabon	2015	45.8589	51.8059	5.94698	83.5767	0.18	648.093	33	Onshore	Light & Medium
336	Tunisia	2015	43.4426	50.2924	6.84982	84.9838	0.97	766.493	34.5	Shallow water	Light & Medium
337	Cameroon	2015	44.3113	51.3899	7.07863	81.2461	3.02	714.51	35	Shallow water	Light & Medium
338	Egypt	2015	43.8134	50.5756	6.76213	53.1705	0.66	378.303	39.9	Shallow water	Light & Medium
339	Gabon	2015	47.6953	52.1255	4.43019	81.5327	1.04	648.093	37	Onshore	Light & Medium
340	Tunisia	2015	48.6494	52.4009	3.75147	93.3494	0.18	766.493	41	Onshore	Light & Medium
341	Tunisia	2015	49.8761	52.4697	2.59362	67.5724	2.88	433.85	42	Onshore	Light & Medium
342	Tunisia	2015	49.0433	51.7469	2.70365	40.2895	0.16	137.5	38.9	Onshore	Light & Medium
343	Nigeria	2015	44.0837	50.8895	6.80583	197.168	0.29	1833.22	48	Shallow water	Light & Medium
344	Angola	2015	45.1615	51.9268	6.76532	47.699	0.58	221.742	35.4	Shallow water	Light & Medium
345	Ghana	2015	50.9627	51.8346	0.871869	33.2046	17.09	121.867	37.6	Ultra-deepwater	Light & Medium
346	Ghana	2015	50.8468	51.6482	0.801353	33.2874	20.36	121.867	36.5	Ultra-deepwater	Light & Medium
347	Egypt	2015	29.8528	45.8766	16.0238	161.457	0.15	378.303	17	Onshore	Heavy
348	Gabon	2015	45.4838	52.2425	6.75869	77.5727	0.24	648.093	38.7	Shallow water	Light & Medium
349	Angola	2015	51.9898	50.3616	0	46.6321	4.56	221.742	31	Deepwater	Light & Medium
350	Gabon	2015	47.263	51.919	4.65596	80.8272	0.45	648.093	34	Onshore	Light & Medium
351	Egypt	2015	54.8463	46.3665	0	50.8293	0.88	378.303	20.9	Shallow water	Heavy
352	Gabon	2015	47.2974	51.7813	4.48389	79.6182	1.99	648.093	32	Onshore	Light & Medium
353	Egypt	2015	44.2323	51.0331	6.80082	53.0026	0.09	378.303	34	Shallow water	Light & Medium
354	Angola	2015	45.0026	51.8304	6.82777	47.0867	1.57	221.742	34	Shallow water	Light & Medium
355	Algeria	2015	47.3216	52.4009	5.07926	78.219	15.46	557.116	41	Onshore	Light & Medium
356	Algeria	2015	47.4168	52.4009	4.98403	78.3819	2.37	557.116	41	Onshore	Light & Medium
357	Algeria	2015	47.4465	52.4009	4.95439	107.483	23.43	557.116	41	Onshore	Light & Medium
358	Nigeria	2015	45.0333	51.8819	6.8486	207.377	1.57	2256.65	37	Shallow water	Light & Medium
359	Angola	2015	45.3401	52.1058	6.76567	47.5924	7.66	221.742	38	Shallow water	Light & Medium
360	Angola	2015	45.2008	51.9705	6.76968	47.9214	2.63	221.742	37	Shallow water	Light & Medium
361	Angola	2015	45.263	52.0369	6.77396	47.2973	0.32	221.742	37	Shallow water	Light & Medium
362	Gabon	2015	48.1066	52.0282	3.92166	80.9605	5.2	648.093	34.3	Onshore	Light & Medium
363	Egypt	2015	46.1407	48.843	2.70233	60.7211	0.11	378.303	35	Onshore	Light & Medium
364	Algeria	2015	48.233	52.4697	4.23668	84.5776	4.12	557.116	42	Onshore	Light & Medium
365	Algeria	2015	48.7395	53.0892	4.34967	78.4656	3.77	557.116	51	Onshore	Light & Medium
366	Libya	2015	48.9192	51.7514	2.83218	77.2169	0.07	585.106	38	Onshore	Light & Medium
367	Tunisia	2015	49.588	52.3709	2.78296	93.5042	0.28	766.493	39.6	Onshore	Light & Medium
368	Nigeria	2015	45.7453	52.514	6.76873	514.321	0.26	5990.55	42	Shallow water	Light & Medium
369	Egypt	2015	31.2901	46.8851	15.595	59.6298	0.11	378.303	22	Onshore	Heavy
370	Egypt	2015	1.08397	35.7376	34.6536	58.747	0.07	378.303	20.92	Onshore	Heavy
371	Egypt	2015	37.224	44.0405	6.81655	52.1339	1.54	378.303	22.5	Shallow water	Light & Medium
372	Algeria	2015	48.8335	52.6271	3.79358	94.6456	4.83	557.116	43	Onshore	Light & Medium
373	Indonesia	2015	45.8342	52.5804	6.7462	52.3415	2.74	340.765	42	Shallow water	Light & Medium
374	Vietnam	2015	45.8969	52.7181	6.82121	43.3316	1.77	274.564	44	Shallow water	Light & Medium
375	Vietnam	2015	44.8009	51.7346	6.93374	44.8673	3.28	274.564	31	Shallow water	Light & Medium
376	Philippines	2015	41.6875	48.6659	6.97836	64.6335	2.26	531.943	35	Shallow water	Light & Medium
377	China	2015	41.7606	50.4824	8.72183	24.998	4.38	46.593	18.6	Shallow water	Heavy
378	China	2015	44.9835	51.8011	6.8176	29.5377	1.64	46.593	31	Shallow water	Light & Medium
379	Thailand	2015	44.3001	51.5748	7.2747	27.7299	5.11	86.5335	29	Shallow water	Light & Medium
380	Vietnam	2015	45.1601	52.1207	6.96065	45.354	0.89	274.564	35	Shallow water	Light & Medium
381	Philippines	2015	40.4651	47.2293	6.76421	70.5482	0.07	531.943	27	Shallow water	Light & Medium
382	China	2015	46.7355	53.5441	6.80863	34.2918	1.82	46.593	56	Shallow water	Light & Medium
383	Indonesia	2015	45.7551	52.5508	6.79571	30.5293	0.95	340.765	43.5	Shallow water	Light & Medium
384	Vietnam	2015	45.6171	52.4152	6.79815	185.768	4.22	274.564	39.6	Shallow water	Light & Medium
385	India	2015	45.4551	52.2644	6.80929	40.1035	5.15	243.064	35.8	Shallow water	Light & Medium
386	India	2015	45.4458	52.2644	6.81853	40.093	3.43	243.064	35.8	Shallow water	Light & Medium
387	Malaysia	2015	44.9424	52.0756	7.13326	63.4984	2.63	519.859	35.31	Shallow water	Light & Medium
388	China	2015	47.6959	52.3243	4.62832	34.8011	0.57	46.593	46	Onshore	Light & Medium
389	Netherlands	2015	44.4254	51.8155	7.39002	25.3644	4.36	11.9204	37	Shallow water	Light & Medium
390	United Kingdom	2015	42.9814	49.9947	7.01323	29.9227	1.84	132.431	35	Shallow water	Light & Medium
391	United Kingdom	2015	45.2016	51.9516	6.75	244.305	0.09	1819.8	39.3	Shallow water	Light & Medium
392	United Kingdom	2015	43.2602	50.1323	6.87208	34.5684	0.04	132.431	37	Shallow water	Light & Medium
393	Poland	2015	42.202	46.0472	3.84521	37.0693	2.43	47.0669	42	Onshore	Light & Medium
394	United Kingdom	2015	45.0351	51.8203	6.78518	34.5811	2.24	132.431	39	Shallow water	Light & Medium
395	Norway	2015	45.1485	52.0268	6.87822	20.4728	0.18	16.6896	42	Shallow water	Light & Medium
396	United Kingdom	2015	45.1716	52.0268	6.85516	30.0006	0.72	132.431	42	Shallow water	Light & Medium
397	United Kingdom	2015	44.7178	51.6137	6.89595	34.68	0.48	132.431	36	Shallow water	Light & Medium
398	Norway	2015	45.579	52.347	6.76793	42.8483	4.73	28.1948	37	Shallow water	Light & Medium
399	United Kingdom	2015	38.0675	44.877	6.80947	33.8834	0.81	132.431	25	Shallow water	Light & Medium
400	Norway	2015	43.8514	51.6437	7.79221	21.1849	1.8	16.6896	30	Shallow water	Light & Medium
401	United Kingdom	2015	45.0361	51.7981	6.76197	34.9562	0.22	132.431	39	Shallow water	Light & Medium
402	United Kingdom	2015	42.2442	49.2916	7.04746	26.2331	0.57	52.8347	30.9	Shallow water	Light & Medium
403	United Kingdom	2015	42.1947	48.855	6.66028	24.7664	59.48	60.8547	32.6	Shallow water	Light & Medium
404	United Kingdom	2015	44.9719	51.8203	6.84838	35.2566	1.86	132.431	39	Shallow water	Light & Medium
405	United Kingdom	2015	36.4306	49.5921	13.1614	27.6458	9.4	56.5443	19.5	Shallow water	Heavy
406	Spain	2015	44.9092	51.6631	6.75389	30.0538	0.28	26.445	33.5	Shallow water	Light & Medium
407	Turkey	2015	46.8319	50.0246	3.1927	32.3907	0.24	26.5062	29	Onshore	Light & Medium
408	United Kingdom	2015	42.7424	49.6505	6.90804	108.02	1.94	876.84	30	Shallow water	Light & Medium
409	United Kingdom	2015	43.5865	50.3241	6.73761	29.6288	6.12	133.911	23.7	Shallow water	Light & Medium
410	United Kingdom	2015	44.5475	51.4072	6.85969	31.1946	0.55	103.456	33	Shallow water	Light & Medium
411	United Kingdom	2015	34.3686	41.1361	6.76747	35.0985	0.15	132.431	35	Shallow water	Light & Medium
412	United Kingdom	2015	34.4331	41.2049	6.77178	35.1404	0.12	132.431	36	Shallow water	Light & Medium
413	United Kingdom	2015	34.5704	41.3426	6.77214	50.6128	0.08	132.431	38	Shallow water	Light & Medium
414	United Kingdom	2015	44.7687	51.7583	6.98962	29.7895	0.07	132.431	38.1	Shallow water	Light & Medium
415	United Kingdom	2015	45.3559	52.2877	6.93185	20.8387	0.33	25.9355	40	Shallow water	Light & Medium
416	Denmark	2015	44.5301	51.2696	6.73946	32.7551	10.01	63.4532	31	Shallow water	Light & Medium
417	France	2015	47.7646	51.4485	3.68398	36.7067	0.1	37.8789	33.6	Onshore	Light & Medium
418	United Kingdom	2015	44.8072	51.7583	6.95111	45.624	1.97	266.465	38.1	Shallow water	Light & Medium
419	United Kingdom	2015	42.7279	49.8031	7.07525	24.5684	0.51	51.916	29	Shallow water	Light & Medium
420	Norway	2015	45.4714	52.2482	6.7768	28.6002	1.02	16.6896	42	Shallow water	Light & Medium
421	United Kingdom	2015	44.9277	51.6826	6.75485	33.3515	0.02	132.431	37	Shallow water	Light & Medium
422	United Kingdom	2015	43.1514	51.2007	8.04935	31.2688	0.37	132.431	30	Shallow water	Light & Medium
423	United Kingdom	2015	44.9957	51.6826	6.68693	49.2112	15.72	95.0807	37	Shallow water	Light & Medium
424	United Kingdom	2015	45.2292	51.9777	6.7485	231.813	0.69	1647.54	40	Shallow water	Light & Medium
425	Norway	2015	44.9217	51.7795	6.85788	63.259	0.79	16.6896	36.8	Shallow water	Light & Medium
426	Denmark	2015	44.8704	51.6311	6.76066	48.1989	2.85	273.76	34	Shallow water	Light & Medium
427	Norway	2015	36.0653	49.2491	13.1838	79.6258	26.52	14.8617	18.7	Shallow water	Heavy
428	United Kingdom	2015	36.5348	50.404	13.8693	37.7189	3.27	132.431	21	Shallow water	Heavy
429	United Kingdom	2015	44.8004	51.6161	6.81575	34.1266	1.4	132.431	37	Shallow water	Light & Medium
430	United Kingdom	2015	44.3925	51.2965	6.90401	34.0061	0.92	132.431	33	Shallow water	Light & Medium
431	United Kingdom	2015	44.5025	51.2965	6.79401	108.413	0.55	871.943	33	Shallow water	Light & Medium
432	Netherlands	2015	45.0091	51.834	6.82494	21.8118	1.48	11.9204	39.2	Shallow water	Light & Medium
433	United Kingdom	2015	43.8865	50.6591	6.77253	33.7383	1.05	132.431	35	Shallow water	Light & Medium
434	United Kingdom	2015	43.2583	50.0366	6.77823	22.4607	0.67	38.0345	34	Shallow water	Light & Medium
435	Norway	2015	44.9941	51.7514	6.75727	24.8143	0.43	16.6896	38	Shallow water	Light & Medium
436	United Kingdom	2015	44.9507	51.8203	6.86951	34.3364	0.87	132.431	39	Shallow water	Light & Medium
437	United Kingdom	2015	43.2341	49.9923	6.75818	22.1137	0.36	0	34	Shallow water	Light & Medium
438	United Kingdom	2015	43.443	50.5453	7.1023	38.2714	4.55	236.308	43	Shallow water	Light & Medium
439	Norway	2015	44.9569	52.332	7.37512	27.3387	5.77	16.6896	40	Shallow water	Light & Medium
440	Norway	2015	44.5493	51.6137	7.06442	30.8719	0.32	16.6896	36	Shallow water	Light & Medium
441	Turkey	2015	46.5673	50.1955	3.62812	35.2003	0.27	26.5062	34.7	Onshore	Light & Medium
442	United Kingdom	2015	44.9618	51.7514	6.7896	36.401	0.15	132.431	38	Shallow water	Light & Medium
443	United Kingdom	2015	44.3282	51.0924	6.76416	35.0412	0.04	132.431	31	Shallow water	Light & Medium
444	United Kingdom	2015	43.4171	50.7656	7.34853	29.6502	10.66	132.431	46.2	Shallow water	Light & Medium
445	Denmark	2015	44.8069	51.6287	6.82185	26.8248	0.95	64.9926	33	Shallow water	Light & Medium
446	Norway	2015	46.3424	53.1311	6.78873	26.6324	8.73	16.6896	50	Shallow water	Light & Medium
447	Albania	2015	-6.61055	41.7376	48.3481	68.973	0.22	91.1096	18	Onshore	Heavy
448	United Kingdom	2015	45.061	51.9729	6.91193	29.9926	1.75	132.431	38	Shallow water	Light & Medium
449	Ukraine	2015	48.0427	50.4077	2.36499	62.22	0.27	378.695	41	Onshore	Light & Medium
450	Spain	2015	83.542	51.5599	0	26.8448	0.5	26.445	32	Deepwater	Light & Medium
451	United Kingdom	2015	44.8809	51.6826	6.8017	34.7661	0.5	132.431	37	Shallow water	Light & Medium
452	United Kingdom	2015	45.5294	52.3344	6.80502	34.6172	3.13	132.431	41	Shallow water	Light & Medium
453	United Kingdom	2015	43.9888	50.9942	7.00546	30.4473	2.92	132.431	27	Shallow water	Light & Medium
454	United Kingdom	2015	45.2011	52.0268	6.82564	34.7719	1.25	132.431	42	Shallow water	Light & Medium
455	Germany	2015	32.6362	45.4678	12.8316	21.7746	9.21	1.81115	22	Shallow water	Heavy
456	United Kingdom	2015	45.6794	52.4894	6.81009	34.8177	0.35	132.431	41	Shallow water	Light & Medium
457	Spain	2015	84.4869	51.3384	0	26.8336	0.33	26.445	32	Deepwater	Light & Medium
458	Norway	2015	45.742	52.6762	6.93417	24.6267	5.92	16.6896	45	Shallow water	Light & Medium
459	United Kingdom	2015	45.3065	52.0764	6.7699	34.7698	2.04	132.431	35	Shallow water	Light & Medium
460	United Kingdom	2015	38.8542	45.7719	6.91771	37.5656	0.36	132.431	38	Shallow water	Light & Medium
461	United Kingdom	2015	44.7507	51.5246	6.77391	37.5288	0.04	132.431	37.6	Shallow water	Light & Medium
462	United Kingdom	2015	44.8975	51.8203	6.92272	37.2078	0.22	132.431	39	Shallow water	Light & Medium
463	United Kingdom	2015	44.7183	51.4587	6.74037	141.789	3.62	825.632	36	Shallow water	Light & Medium
464	Norway	2015	45.0608	52.086	7.02522	21.7769	0.66	16.6896	39	Shallow water	Light & Medium
465	United Kingdom	2015	44.6859	51.5596	6.87364	31.8283	2.06	132.431	36.5	Shallow water	Light & Medium
466	Albania	2015	23.4201	41.3171	17.897	149.782	7.07	91.1096	13.5	Onshore	Heavy
467	United Kingdom	2015	44.9527	51.7514	6.7987	36.9399	2.33	132.431	38	Shallow water	Light & Medium
468	United Kingdom	2015	44.6	51.4072	6.80721	38.0404	0.26	132.431	33	Shallow water	Light & Medium
469	United Kingdom	2015	45.2911	52.0836	6.79253	62.587	2.92	424.585	38	Shallow water	Light & Medium
470	Netherlands	2015	44.8776	51.664	6.78645	22.8721	0.28	11.9204	34.8	Shallow water	Light & Medium
471	Spain	2015	44.8501	51.7514	6.90135	27.3255	0.31	26.445	38	Shallow water	Light & Medium
472	Denmark	2015	44.5759	51.3803	6.8044	24.9198	0.44	64.9926	31	Shallow water	Light & Medium
473	United Kingdom	2015	45.4419	52.1967	6.75488	383.774	0.07	4049.14	39	Shallow water	Light & Medium
474	United Kingdom	2015	44.2115	51.0631	6.8516	32.7426	0.29	132.431	28	Shallow water	Light & Medium
475	United Kingdom	2015	41.5138	48.2723	6.7585	32.7731	0.38	132.431	32.5	Shallow water	Light & Medium
476	Netherlands	2015	45.8114	49.3063	3.49489	30.0092	1.33	11.9204	25	Onshore	Light & Medium
477	United Kingdom	2015	44.3291	51.087	6.75788	66.9591	3.3	420.388	38	Shallow water	Light & Medium
478	Turkey	2015	42.6229	49.7265	7.10362	39.041	0.97	26.5062	34	Onshore	Light & Medium
479	Denmark	2015	44.3612	51.1319	6.77069	32.1822	3.23	64.9926	29	Shallow water	Light & Medium
480	Norway	2015	45.6472	52.2632	6.61599	45.2353	40.02	15.9913	39	Shallow water	Light & Medium
481	Denmark	2015	45.1605	51.9729	6.81243	26.2789	6.5	59.9349	38	Shallow water	Light & Medium
482	Norway	2015	45.0545	51.8203	6.76576	32.1548	1.8	16.6896	39	Shallow water	Light & Medium
483	Romania	2015	38.7881	50.2295	11.4414	38.7849	2.37	39.0865	15.89	Onshore	Heavy
484	Denmark	2015	45.0259	51.8352	6.80929	28.2933	1.02	64.9926	36	Shallow water	Light & Medium
485	Norway	2015	45.0063	51.7996	6.79329	25.3194	0.88	16.6896	38.7	Shallow water	Light & Medium
486	United Kingdom	2015	43.9607	50.7129	6.75223	332.977	0.18	3273.98	39	Shallow water	Light & Medium
487	United Kingdom	2015	44.774	51.5521	6.77814	44.4928	0.45	132.431	38	Shallow water	Light & Medium
488	United Kingdom	2015	45.4219	52.2081	6.78617	35.3413	1.69	132.431	38.2	Shallow water	Light & Medium
489	United Kingdom	2015	42.4398	49.3614	6.92157	31.5855	1.74	132.431	25.8	Shallow water	Light & Medium
490	Norway	2015	45.442	52.1943	6.75237	43.9465	3.13	74.9222	38	Shallow water	Light & Medium
491	Denmark	2015	45.4224	52.2482	6.82587	25.3479	3.83	64.9926	42	Shallow water	Light & Medium
492	Norway	2015	44.8474	51.5449	6.6975	26.0648	15.73	12.5605	35	Shallow water	Light & Medium
493	Norway	2015	44.2583	51.1708	6.91252	22.8133	4.96	16.6896	36	Shallow water	Light & Medium
494	Norway	2015	40.8594	47.865	7.0056	38.9546	5.61	0	29.8	Shallow water	Light & Medium
495	United Kingdom	2015	44.4935	51.4761	6.98262	30.791	1.41	132.431	34	Shallow water	Light & Medium
496	United Kingdom	2015	45.5303	52.2901	6.7598	49.0164	5.99	132.431	41	Shallow water	Light & Medium
497	Venezuela	2015	44.5847	47.0916	2.50696	61.2514	0.16	343.775	25	Onshore	Light & Medium
498	Brazil	2015	43.8727	49.8701	5.99741	41.3525	21.41	50.8468	20	Ultra-deepwater	Heavy
499	Venezuela	2015	39.3065	46.0681	6.76159	60.9994	0.17	343.775	23	Shallow water	Light & Medium
500	Venezuela	2015	26.1516	45.9993	19.8477	161.212	14.6	85.32	22	Shallow water	Heavy
501	Argentina	2015	46.5358	50.9403	4.40454	53.1679	4.23	98.4733	23	Onshore	Light & Medium
502	Argentina	2015	46.9943	51.2845	4.29026	41.489	6.94	98.4733	28	Onshore	Light & Medium
503	Venezuela	2015	35.8771	41.748	5.8709	57.5451	3.57	343.775	8.5	Onshore	Heavy
504	Venezuela	2015	35.6772	41.748	6.07083	57.43	5.48	343.775	8.5	Onshore	Heavy
505	Argentina	2015	47.879	51.3534	3.47432	49.9965	35.18	98.4733	29	Onshore	Light & Medium
506	Ecuador	2015	43.6304	49.262	5.63163	45.1926	4.69	188.305	25	Onshore	Light & Medium
507	Venezuela	2015	42.9011	49.7223	6.82114	88.0319	11.68	343.775	23	Shallow water	Light & Medium
508	Colombia	2015	48.0828	51.7245	3.64164	37.0453	1.52	78.8339	36	Onshore	Light & Medium
509	Argentina	2015	36.6049	50.8371	14.2322	58.5501	3.88	6.35	21.5	Onshore	Heavy
510	Argentina	2015	47.0207	51.6527	4.63201	38.3274	1.16	98.4733	43	Onshore	Light & Medium
511	Ecuador	2015	36.382	46.7918	10.4097	44.4509	1.35	188.305	20	Onshore	Heavy
512	Venezuela	2015	38.1421	43.7756	5.63348	57.3908	3.05	343.775	9	Onshore	Heavy
513	Venezuela	2015	42.5716	49.3303	6.7587	71.1675	1.45	343.775	35	Shallow water	Light & Medium
514	Argentina	2015	47.7828	52.341	4.5582	38.672	0.31	98.4733	53	Onshore	Light & Medium
515	Venezuela	2015	26.4079	46.4422	20.0343	157.029	29.2	343.775	22	Shallow water	Heavy
516	Ecuador	2015	29.7302	46.9294	17.1992	44.5778	2.24	188.305	22	Onshore	Heavy
517	Argentina	2015	47.6298	51.2845	3.6547	42.2436	5.5	98.4733	28	Onshore	Light & Medium
518	Venezuela	2015	43.5184	50.9948	7.47639	219.09	4.02	343.775	18	Onshore	Heavy
519	Argentina	2015	47.8072	51.4222	3.61495	39.1146	1.63	98.4733	30	Onshore	Light & Medium
520	Venezuela	2015	27.4122	45.4187	18.0064	77.1403	1.2	343.775	20	Shallow water	Heavy
521	Brazil	2015	54.9565	52.2901	0	28.0072	2.23	50.8468	41	Ultra-deepwater	Light & Medium
522	Colombia	2015	45.0355	50.5983	5.56278	37.9441	1.62	78.8339	30.9	Onshore	Light & Medium
523	Argentina	2015	48.1795	51.0331	2.85368	100.24	3.4	98.4733	34	Onshore	Light & Medium
524	Colombia	2015	46.9382	50.3302	3.39191	37.8153	0.08	78.8339	37.3	Onshore	Light & Medium
525	Colombia	2015	46.7329	50.3636	3.63071	39.2755	0.52	78.8339	25.56	Onshore	Light & Medium
526	Ecuador	2015	45.9918	49.6062	3.61438	68.5905	27.34	188.305	30	Onshore	Light & Medium
527	Brazil	2015	50.1017	52.6247	2.52301	38.2833	0.01	50.8468	42	Onshore	Light & Medium
528	Colombia	2015	35.3018	50.6537	15.3519	53.5573	1.1	78.8339	42	Onshore	Shale & Tight Oil
529	Trinidad and Tobago	2015	44.2876	51.0631	6.77549	41.9034	0.36	204.61	28	Shallow water	Light & Medium
530	Colombia	2015	41.2555	48.9286	7.67309	141.069	1.36	78.8339	20.8	Onshore	Heavy
531	Argentina	2015	47.9987	50.9104	2.91173	45.0598	2.99	98.4733	29	Onshore	Light & Medium
532	Brazil	2015	41.9232	49.3805	7.45734	25.5596	0.66	50.8468	19	Deepwater	Heavy
533	Colombia	2015	34.9183	46.7439	11.8255	36.0424	0.8	78.8339	22.2	Onshore	Heavy
534	Syria	2015	48.3077	50.8509	2.54322	184.417	0.24	1866.97	36.5	Onshore	Light & Medium
535	United Arab Emirates	2015	41.5375	48.2918	6.75429	169.054	3.58	23.7554	36	Shallow water	Light & Medium
536	Bahrain	2015	39.2755	45.8167	6.54121	30.9782	54.75	61.6402	29	Shallow water	Light & Medium
537	Qatar	2015	39.2342	46.1564	6.92221	26.701	8.4	56.5813	27.5	Shallow water	Light & Medium
538	Iran	2015	42.2152	44.877	2.66177	53.8069	13.11	298.549	25	Onshore	Light & Medium
539	Iran	2015	45.5911	48.3217	2.73063	489.096	21.41	298.549	30	Onshore	Light & Medium
540	Iraq	2015	41.6908	47.2024	5.51155	38.1608	31.02	94.4	25	Onshore	Light & Medium
541	Yemen	2015	49.5722	52.4846	2.91247	117.756	1.59	1384.11	39	Onshore	Light & Medium
542	Saudi Arabia	2015	44.4726	48.5551	4.08257	36.7251	29.2	17.339	35	Onshore	Light & Medium
543	Qatar	2015	41.2958	48.0164	6.72058	38.6482	33.46	56.5813	32	Shallow water	Light & Medium
544	Qatar	2015	41.7246	48.6515	6.92691	26.363	2.59	56.5813	29	Shallow water	Light & Medium
545	Iraq	2015	45.6637	48.3457	2.68195	80.6437	3.91	389.172	40	Onshore	Light & Medium
546	Iraq	2015	44.7943	47.352	2.55778	62.9974	27.51	48.29	32	Onshore	Light & Medium
547	Iraq	2015	38.455	46.9929	8.53788	66.4	18.25	389.172	30	Onshore	Shale & Tight Oil
548	Iran	2015	46.9276	49.6056	2.67805	104.4	0.32	298.549	39	Onshore	Light & Medium
549	Iran	2015	40.4692	47.9326	7.46344	56.4839	4.98	298.549	34	Shallow water	Light & Medium
550	Iran	2015	41.2623	47.9326	6.67037	122.172	18.98	298.549	34	Shallow water	Light & Medium
551	Iraq	2015	44.1555	50.3388	6.18336	66.2744	1.67	389.172	40	Onshore	Light & Medium
552	United Arab Emirates	2015	44.0202	50.8207	6.80047	29.0755	6.94	23.7554	47	Shallow water	Light & Medium
553	United Arab Emirates	2015	41.5544	48.3561	6.80171	28.5727	5.11	23.7554	30.5	Shallow water	Light & Medium
554	Iran	2015	46.1506	48.8089	2.65833	57.8642	19.47	298.549	30	Onshore	Light & Medium
555	Canada	2015	40.6056	46.7101	6.10452	36.8813	3.57	40.0243	27.5	Onshore	Light & Medium
556	Canada	2015	37.0412	44.0192	6.97805	106.189	0.11	2	9	Onshore	Sands
557	Canada	2015	43.4008	48.5087	5.1079	40.5561	1.05	40.0243	29.5	Onshore	Light & Medium
558	United States	2015	83.0647	50.0635	0	36.5064	2.46	90.267	36	Deepwater	Light & Medium
559	United States	2015	27.4653	48.0468	20.5816	34.4742	0.41	90.267	22.79	Deepwater	Light & Medium
560	United States	2015	19.8144	46.0098	26.1954	35.5644	0.29	90.267	25.37	Deepwater	Light & Medium
561	United States	2015	45.1896	47.488	2.29832	35.4307	37.98	90.267	27.54	Ultra-deepwater	Light & Medium
562	United States	2015	46.1279	51.3339	5.20595	55.4095	0.33	90.267	25.5	Onshore	Light & Medium
563	United States	2015	68.8743	50.753	0	35.9667	0.46	90.267	29.93	Deepwater	Light & Medium
564	United States	2015	32.2804	50.7578	18.4774	32.9588	2.53	90.267	30	Ultra-deepwater	Light & Medium
565	Mexico	2015	44.2696	51.102	6.83239	44.7571	7.95	186.833	35	Shallow water	Light & Medium
566	Canada	2015	39.604	44.3952	4.79111	35.7746	0.01	40.0243	18	Onshore	Heavy
567	United States	2015	34.8369	51.0331	16.1963	37.4765	0.54	90.267	34	Deepwater	Light & Medium
568	United States	2015	31.05	49.3057	18.2557	36.4126	2.7	90.267	34	Deepwater	Light & Medium
569	United States	2015	22.245	48.304	26.059	37.9372	1.24	90.267	32.96	Deepwater	Light & Medium
570	United States	2015	43.5246	43.5632	0.0385465	27.6516	2.44	90.267	22	Ultra-deepwater	Heavy
571	United States	2015	43.2658	50.0249	6.75914	66.7344	0.12	90.267	35.44	Shallow water	Light & Medium
572	United States	2015	43.5893	43.5632	0	27.2238	3.89	90.267	22	Ultra-deepwater	Heavy
573	United States	2015	97.5862	49.5059	0	43.4868	2.16	90.267	27.9	Deepwater	Light & Medium
574	United States	2015	42.9334	49.6849	6.75153	49.3151	0.51	90.267	30.5	Shallow water	Light & Medium
575	United States	2015	34.3455	48.6388	14.2933	35.3431	0.95	90.267	31.39	Ultra-deepwater	Light & Medium
576	United States	2015	22.3119	47.5937	25.2818	37.1744	0.43	90.267	29.72	Deepwater	Light & Medium
577	United States	2015	39.4272	48.4055	8.97826	34.798	1.86	90.267	28	Ultra-deepwater	Light & Medium
578	United States	2015	61.5747	50.3388	0	35.2287	4.16	90.267	40	Deepwater	Light & Medium
579	United States	2015	24.2176	50.0662	25.8487	34.0409	0.14	90.267	36.04	Deepwater	Light & Medium
580	Canada	2015	44.9003	48.0028	3.1025	41.4501	4.07	40.0243	29.55	Onshore	Light & Medium
581	Canada	2015	42.0325	46.6447	4.61217	40.7921	2.29	40.0243	26.55	Onshore	Light & Medium
582	United States	2015	46.7016	45.0835	0	36.4079	5.06	90.267	28	Deepwater	Light & Medium
583	United States	2015	36.2112	45.4277	9.21651	39.3087	0.18	90.267	33	Deepwater	Light & Medium
584	United States	2015	57.4502	49.7193	0	35.508	0.51	90.267	31	Deepwater	Light & Medium
585	Canada	2015	34.1502	40.5569	6.40668	84.3806	47.7	1.6275	10.5	Onshore	Sands
586	United States	2015	62.4119	51.3833	0	33.5141	0.37	90.267	23	Deepwater	Light & Medium
587	United States	2015	21.6112	45.2515	23.6403	37.0594	1.7	90.267	30.44	Deepwater	Light & Medium
588	United States	2015	59.9991	49.857	0	28.0524	1.22	90.267	33	Deepwater	Light & Medium
589	United States	2015	61.032	47.4358	0	36.4176	0.61	90.267	30	Deepwater	Light & Medium
590	United States	2015	67.4207	48.7235	0	32.7409	4.58	90.267	32.62	Deepwater	Light & Medium
591	United States	2015	45.7235	52.4918	6.76832	40.1681	1.27	90.267	42	Shallow water	Light & Medium
592	United States	2015	26.0641	48.7462	22.6822	39.2022	0.49	90.267	32.95	Deepwater	Light & Medium
593	Canada	2015	33.9553	37.1317	3.17638	106.955	2.01	2	9	Onshore	Sands
594	Canada	2015	44.5152	51.157	6.6418	30.9718	28.73	64.8635	35.8	Shallow water	Light & Medium
595	United States	2015	30.3635	51.611	21.2476	34.3076	3.16	90.267	34.03	Ultra-deepwater	Light & Medium
596	United States	2015	43.9944	49.6505	5.65609	32.5069	0.88	90.267	30	Ultra-deepwater	Light & Medium
597	United States	2015	32.4962	48.5432	16.047	32.8809	0.39	90.267	30	Deepwater	Light & Medium
598	United States	2015	40.3757	46.0382	5.66254	27.7138	9.1	90.267	29	Ultra-deepwater	Light & Medium
599	Canada	2015	36.375	42.7371	6.36213	98.0331	6.37	2	10	Onshore	Sands
600	Canada	2015	43.1544	46.8925	3.73806	40.5338	6.72	40.0243	30.15	Onshore	Light & Medium
601	Canada	2015	45.1086	50.8157	5.70707	34.3326	1.61	40.0243	32.45	Onshore	Light & Medium
602	Canada	2015	41.3622	46.7996	5.43734	31.5757	0.75	40.0243	28.8	Onshore	Light & Medium
603	United States	2015	27.2834	47.3326	20.0492	36.3766	0.28	90.267	28.5	Deepwater	Light & Medium
604	United States	2015	44.3625	47.4657	3.10326	76.3175	30.1	90.267	24	Onshore	Light & Medium
605	United States	2015	30.1413	49.7881	19.6468	38.864	0.06	90.267	32	Deepwater	Light & Medium
606	United States	2015	40.9773	49.5564	8.57901	40.8041	4.83	90.267	31.85	Deepwater	Light & Medium
607	Canada	2015	30.9624	37.1317	6.16929	92.0863	11.21	2	9	Onshore	Sands
608	United States	2015	31.1353	50.285	19.1497	39.9649	0.35	90.267	36	Deepwater	Light & Medium
609	United States	2015	33.3903	51.0918	17.7015	41.2999	1.1	90.267	40	Deepwater	Light & Medium
610	United States	2015	28.1822	48.4055	20.2232	43.8104	0.11	90.267	28	Deepwater	Light & Medium
611	United States	2015	44.8872	51.53	6.64279	36.9764	0.74	90.267	38	Deepwater	Light & Medium
612	United States	2015	32.5732	51.3016	18.7284	41.086	0.78	90.267	37.9	Deepwater	Light & Medium
613	United States	2015	45.0327	51.7813	6.74865	33.1051	1.59	90.267	32	Shallow water	Light & Medium
614	Canada	2015	37.1223	44.0192	6.89698	106.261	0.73	2	9	Onshore	Sands
615	United States	2015	26.4446	48.5616	22.117	32.9072	0.04	90.267	27.05	Deepwater	Light & Medium
616	United States	2015	47.1208	51.1708	4.05006	44.8458	0.47	90.267	36	Onshore	Light & Medium
617	United States	2015	45.4036	52.1599	6.75628	35.099	0.64	90.267	37.5	Shallow water	Light & Medium
618	United States	2015	20.0507	48.184	28.1333	35.283	0.15	90.267	28	Deepwater	Light & Medium
619	United States	2015	38.3896	48.4055	10.0159	32.4923	0.31	90.267	28	Deepwater	Light & Medium
620	United States	2015	41.4301	44.9363	3.50611	33.416	3.15	90.267	22	Ultra-deepwater	Heavy
621	United States	2015	43.8425	47.9042	4.06166	30.0943	8.96	90.267	17.5	Shallow water	Heavy
622	Canada	2015	48.2308	51.6308	3.40006	51.6166	3.62	40.0243	38.5	Onshore	Light & Medium
623	Mexico	2015	45.6529	51.2397	5.58674	55.2423	3.56	186.833	37	Onshore	Light & Medium
624	United States	2015	40.7988	47.6947	6.89591	36.1439	4.24	90.267	22.5	Shallow water	Light & Medium
625	United States	2015	34.7767	49.8863	15.1096	36.4374	1.04	90.267	36	Deepwater	Light & Medium
626	United States	2015	41.3275	49.5128	8.18529	29.2017	0.18	90.267	28	Deepwater	Light & Medium
627	United States	2015	35.678	49.5885	13.9106	37.8499	0.09	90.267	29.1	Deepwater	Light & Medium
628	Canada	2015	36.9701	43.8445	6.87432	108.566	1.76	2	10	Onshore	Sands
629	United States	2015	82.7231	49.8191	0	33.7454	1.4	90.267	32.45	Deepwater	Light & Medium
630	Canada	2015	29.4353	44.1542	14.7189	33.5946	18.55	40.0243	14.5	Onshore	Heavy
631	Canada	2015	28.5701	44.1886	15.6186	32.9998	8.91	40.0243	15	Onshore	Heavy
632	Canada	2015	38.3795	46.2695	7.88999	37.0059	0.22	40.0243	21.1	Onshore	Heavy
633	United States	2015	51.0454	48.3072	0	34.6792	0.67	90.267	29.79	Deepwater	Light & Medium
634	United States	2015	38.9389	47.8788	8.9399	37.8373	11.07	90.267	30	Deepwater	Light & Medium
635	United States	2015	24.3019	51.1858	26.8839	66.4456	1.67	90.267	33	Deepwater	Light & Medium
636	United States	2015	43.4755	50.4825	7.00701	31.4389	0.53	90.267	26	Shallow water	Light & Medium
637	Mexico	2015	43.6108	48.7497	5.13884	52.0162	1.65	186.833	33	Onshore	Light & Medium
638	Canada	2015	17.7122	43.9133	26.2011	110.413	2.08	40.0243	11	Onshore	Heavy
639	United States	2015	61.2162	47.5047	0	35.186	30.82	90.267	31	Deepwater	Light & Medium
640	United States	2015	72.3425	50.1323	0	30.8755	2.95	90.267	37	Ultra-deepwater	Light & Medium
641	Mexico	2015	44.0384	50.8266	6.78826	45.4853	6.36	186.833	31	Shallow water	Light & Medium
642	United States	2015	40.026	49.5128	9.48684	27.7308	12.12	90.267	28	Ultra-deepwater	Light & Medium
643	United States	2015	49.0573	51.6437	2.58631	56.7199	0.88	90.267	30	Onshore	Light & Medium
644	United States	2015	44.6941	51.2279	6.53383	43.4173	2.09	90.267	36.83	Deepwater	Light & Medium
645	United States	2015	31.459	47.2817	15.8227	37.918	0.54	90.267	16.5	Onshore	Heavy
646	United States	2015	47.3047	49.675	2.3703	35.4989	22.05	90.267	31	Deepwater	Light & Medium
647	United States	2015	47.3689	51.2397	3.87073	45.2133	2.69	90.267	37	Onshore	Light & Medium
648	Canada	2015	44.2797	51.0568	6.77708	33.2833	13.06	156.882	33.7	Shallow water	Light & Medium
649	United States	2015	35.8074	49.7881	13.9808	35.2169	0.85	90.267	32	Ultra-deepwater	Light & Medium
650	United States	2015	38.6704	50.8074	12.137	33.8547	0.77	90.267	30.72	Ultra-deepwater	Light & Medium
651	United States	2015	24.564	50.1323	25.5683	47.6318	0.19	90.267	37	Ultra-deepwater	Light & Medium
652	United States	2015	44.3208	51.1023	6.7814	44.5803	1.34	90.267	23.1	Shallow water	Light & Medium
653	United States	2015	17.7902	48.8116	31.0214	39.6273	0.24	90.267	33.9	Deepwater	Light & Medium
654	United States	2015	68.1686	52.4158	0	38.7141	9.46	90.267	38	Deepwater	Light & Medium
655	Canada	2015	37.7187	43.8445	6.12576	144.6	4.18	2	10	Onshore	Sands
656	United States	2015	45.0611	50.4825	5.42135	39.5157	0.14	90.267	26	Deepwater	Light & Medium
657	United States	2015	28.2972	47.613	19.3158	36.4969	9.33	90.267	30	Deepwater	Light & Medium
658	United States	2015	43.7772	50.6477	6.87051	31.7854	0.68	90.267	28.4	Shallow water	Light & Medium
659	United States	2015	37.6134	47.1216	9.50814	37.2718	5.88	90.267	19	Onshore	Heavy
660	Canada	2015	44.49	51.2268	6.73674	42.5298	9.43	135.828	30.7	Shallow water	Light & Medium
661	Canada	2015	44.4358	51.2268	6.791	28.6736	7.14	40.0243	30.7	Shallow water	Light & Medium
662	United States	2015	22.5294	46.3547	23.8253	37.9336	0.07	90.267	30.38	Deepwater	Light & Medium
663	Australia	2015	49.5665	52.2844	2.71793	56.76	1.69	285.797	37.7	Onshore	Light & Medium
664	Papua New Guinea	2015	49.1506	51.9292	2.77856	41.5932	0.3	135.701	43.8	Onshore	Light & Medium
665	Papua New Guinea	2015	49.0921	51.943	2.85088	41.9946	0.46	135.701	44	Onshore	Light & Medium
666	Australia	2015	44.2567	50.1508	5.89412	44.615	2.6	285.797	17	Shallow water	Heavy
667	Azerbaijan	2015	47.1898	51.8166	4.62685	67.7648	1.35	22.2133	33.8	Onshore	Light & Medium
668	Russian Federation	2015	49.3462	51.691	2.34482	54.2435	0.28	187.195	32.94	Onshore	Light & Medium
669	Azerbaijan	2015	45.7251	51.039	5.31382	40.1545	1.02	22.2133	27.65	Onshore	Light & Medium
670	Russian Federation	2015	40.9778	48.5449	7.56712	59.5257	4.92	187.195	17.8	Onshore	Heavy
671	Russian Federation	2015	41.26	45.6072	4.34725	61.6902	3.43	187.195	26.6	Onshore	Light & Medium
672	Russian Federation	2015	44.3554	48.9145	4.5591	51.2402	0.55	187.195	40.22	Onshore	Light & Medium
673	Kazakhstan	2015	45.0145	49.6654	4.65092	53.6149	1.01	214.167	27	Onshore	Light & Medium
674	Russian Federation	2015	49.0905	52.0292	2.93863	51.0684	0.35	187.195	43	Onshore	Light & Medium
675	Russian Federation	2015	49.6047	52.0476	2.44295	64.6679	2.54	187.195	36.19	Onshore	Light & Medium
676	Kazakhstan	2015	46.838	51.5551	4.71707	39.7377	1.77	146.8	30	Onshore	Light & Medium
677	Russian Federation	2015	45.8999	48.9542	3.05431	61.8224	30.78	187.195	26.32	Onshore	Light & Medium
678	Russian Federation	2015	46.1456	49.6346	3.48893	43.5436	3.77	187.195	35.56	Onshore	Light & Medium
679	Russian Federation	2015	46.2283	49.7337	3.50541	42.6454	1.17	174.3	35.07	Onshore	Light & Medium
680	Kazakhstan	2015	46.6898	52.465	5.77521	46.2804	4.44	214.167	39.68	Onshore	Light & Medium
681	Russian Federation	2015	44.2627	49.5379	5.27525	45.1938	1.3	187.195	20	Onshore	Heavy
682	Russian Federation	2015	48.7471	51.8078	3.06066	51.9964	0.42	187.195	37.21	Onshore	Light & Medium
683	Kazakhstan	2015	47.0928	52.3901	5.29724	45.2483	4.99	214.167	40.2	Onshore	Light & Medium
684	Russian Federation	2015	48.0513	50.7338	2.6824	45.4279	0.56	187.195	35.12	Onshore	Light & Medium
685	Russian Federation	2015	46.9062	50.7353	3.8291	45.231	16.36	187.195	38.36	Onshore	Light & Medium
686	Kazakhstan	2015	27.6643	46.8657	19.2014	48.2527	14.29	214.167	18.5	Onshore	Heavy
687	Kazakhstan	2015	17.3923	46.8851	29.4928	47.4827	12.15	214.167	22	Onshore	Heavy
688	Russian Federation	2015	48.5665	51.6597	3.09318	44.0769	1.7	174.78	40.85	Onshore	Light & Medium
689	Russian Federation	2015	37.652	45.6	7.948	43.3712	0.72	187.195	18.13	Onshore	Heavy
690	Kazakhstan	2015	45.7998	49.356	3.5562	47.2322	0.39	214.167	25.4	Onshore	Light & Medium
691	Turkmenistan	2015	46.2266	51.307	5.08038	85.1843	1.94	683.658	30.9	Onshore	Light & Medium
692	Georgia	2015	48.6331	51.9531	3.32003	62.6862	0.27	374.128	39	Onshore	Light & Medium
693	Russian Federation	2015	45.8917	49.137	3.24533	34.0894	3.2	76.44	33.48	Onshore	Light & Medium
694	Russian Federation	2015	47.5381	50.4362	2.8981	29.301	3.11	23.03	34.98	Onshore	Light & Medium
695	Russian Federation	2015	50.3036	53.1066	2.803	52.6619	0.26	187.195	49	Onshore	Light & Medium
696	Russian Federation	2015	48.3738	52.1993	3.82549	71.5406	8.88	187.195	37.75	Onshore	Light & Medium
697	Kazakhstan	2015	45.2219	52.177	6.95512	45.0131	1.72	214.167	47.4	Shallow water	Light & Medium
698	Russian Federation	2015	49.7855	52.1203	2.33478	59.0508	0.4	187.195	39.82	Onshore	Light & Medium
699	Russian Federation	2015	44.3143	48.7349	4.42058	28.8132	3.18	15.202	24.42	Onshore	Light & Medium
700	Russian Federation	2015	50.0143	52.3354	2.32113	47.3339	0.01	187.195	41.98	Onshore	Light & Medium
701	Russian Federation	2015	47.0734	50.0043	2.93088	43.9641	0.77	187.195	35.14	Onshore	Light & Medium
702	Russian Federation	2015	42.76	47.6229	4.8629	43.9862	0.01	187.195	18.24	Onshore	Heavy
703	Russian Federation	2015	47.404	50.2516	2.84763	42.4161	2.51	187.195	34.55	Onshore	Light & Medium
704	Russian Federation	2015	48.6043	51.8357	3.23136	54.3543	2.26	187.195	36.65	Onshore	Light & Medium
705	Russian Federation	2015	47.9613	50.9881	3.02683	42.4853	1.17	168.271	35.92	Onshore	Light & Medium
706	Russian Federation	2015	45.6668	49.1953	3.52848	44.0996	3.06	187.195	34.97	Onshore	Light & Medium
707	Russian Federation	2015	44.7352	48.898	4.16279	50.098	1.34	187.195	34.19	Onshore	Light & Medium
708	Russian Federation	2015	39.5938	46.3584	6.76458	22.4683	5.87	33.19	24	Shallow water	Light & Medium
709	Kazakhstan	2015	46.7503	52.1076	5.35723	53.3187	1.87	214.167	40.6	Onshore	Light & Medium
710	Russian Federation	2015	46.3695	49.2813	2.91181	34.0622	0.47	73.4322	28.82	Onshore	Light & Medium
711	Russian Federation	2015	48.223	52.4457	4.22273	48.0004	12.19	187.195	39.4	Onshore	Light & Medium
712	Kazakhstan	2015	45.0914	49.5978	4.50639	47.584	0.57	214.167	22.8	Onshore	Light & Medium
713	Kazakhstan	2015	45.8248	49.8959	4.07112	53.3891	0.87	214.167	40	Onshore	Light & Medium
714	Russian Federation	2015	39.7049	45.0917	5.38681	46.1512	0.16	187.195	26.51	Onshore	Light & Medium
715	Kazakhstan	2015	48.382	51.7185	3.33646	53.6688	0.24	214.167	37.2	Onshore	Light & Medium
716	Russian Federation	2015	47.6672	50.4101	2.74288	51.1118	0.17	187.195	42	Onshore	Light & Medium
717	Russian Federation	2015	46.9399	50.611	3.67109	32.5385	2.09	50.37	30.12	Onshore	Light & Medium
718	Russian Federation	2015	46.2167	51.9507	5.73399	43.064	3.12	187.195	38	Onshore	Light & Medium
719	Russian Federation	2015	44.7783	51.5914	6.8131	48.2075	12.86	187.195	42.11	Shallow water	Light & Medium
720	Russian Federation	2015	47.2708	50.8051	3.53431	43.3012	0.35	187.195	34.87	Onshore	Light & Medium
721	Kazakhstan	2015	45.9415	52.9653	7.02382	52.3613	2.2	214.167	49.2	Onshore	Light & Medium
722	Kazakhstan	2015	44.2409	50.0724	5.83157	47.0717	1.28	214.167	26.8	Onshore	Light & Medium
723	Russian Federation	2015	46.0162	50.3769	4.36071	51.4292	0.07	187.195	39.91	Onshore	Light & Medium
724	Russian Federation	2015	48.6015	51.3904	2.7889	51.2672	0.07	187.195	39.19	Onshore	Light & Medium
725	Russian Federation	2015	39.7368	49.135	9.39821	49.6441	0.26	187.195	31.52	Onshore	Light & Medium
726	United Kingdom	2015	44.5929	51.6482	7.0553	36.5643	0.5	132.431	36.5	Shallow water	Light & Medium
727	United Kingdom	2015	44.4226	51.6826	7.25994	33.231	0.69	132.431	37	Shallow water	Light & Medium
728	United Kingdom	2015	44.9384	51.8891	6.95073	50.2831	1.57	277.116	40	Shallow water	Light & Medium
729	United Kingdom	2015	43.4508	50.2311	6.78031	49.0605	1.1	285.736	32	Shallow water	Light & Medium
730	United Kingdom	2015	40.8373	47.5885	6.75119	37.8437	3.06	152.045	29	Shallow water	Light & Medium
731	United Kingdom	2015	31.8022	50.7039	18.9017	30.5387	7.1	97.7177	26	Deepwater	Light & Medium
732	Norway	2015	44.9481	51.7514	6.80329	25.6528	1.62	16.6896	38	Shallow water	Light & Medium
733	Norway	2015	44.173	51.8203	7.64725	30.7979	1.78	16.6896	39	Shallow water	Light & Medium
734	Norway	2015	44.8894	51.6556	6.76629	22.557	0.1	16.6896	35	Shallow water	Light & Medium
735	Norway	2015	45.2278	52.1082	6.88039	23.6638	3.99	16.6896	39	Shallow water	Light & Medium
736	Norway	2015	45.1891	51.9507	6.76161	20.8805	0.22	16.6896	38	Shallow water	Light & Medium
737	Norway	2015	46.6585	53.61	6.95145	31.5716	1.73	16.6896	65	Shallow water	Light & Medium
738	United States	2015	37.4263	50.6986	13.2723	43.4109	29.58	90.267	33	Ultra-deepwater	Light & Medium
739	Angola	2015	43.4729	49.8119	6.33906	51.5695	5.11	112.685	22.05	Deepwater	Heavy
740	Brazil	2015	44.2636	49.6487	5.38502	29.0248	8.37	10	20	Deepwater	Heavy
741	Brazil	2015	34.6181	50.941	16.3229	174.938	119.37	38.9166	28.8	Ultra-deepwater	Light & Medium
742	Brazil	2015	49.5187	50.0569	0.538228	58.0997	122.06	50.8468	24	Ultra-deepwater	Light & Medium
743	China	2015	33.1725	50.1895	17.017	132.001	20.08	46.593	15.31	Onshore	Heavy
744	China	2015	46.9993	51.3659	4.36661	38.6791	25.88	46.593	25	Onshore	Light & Medium
745	China	2015	46.8444	50.233	3.38862	34.1292	18.25	29.2038	15.62	Shallow water	Heavy
746	China	2015	39.9908	49.8932	9.90239	26.9089	21.9	46.593	13.9	Shallow water	Heavy
747	Colombia	2015	16.4933	48.2908	31.7975	43.1618	59.74	78.8339	12.5	Onshore	Heavy
748	Iran	2015	46.613	49.0813	2.46827	143.055	49.04	298.549	34.6	Onshore	Light & Medium
749	Iran	2015	46.0828	48.7221	2.63937	37.6678	143.35	33.91	32.6	Onshore	Light & Medium
750	Iran	2015	46.7905	50.7129	3.9224	95.2474	46.84	298.549	39	Onshore	Light & Medium
751	Iran	2015	45.795	48.3905	2.59557	101.812	116.3	298.549	31	Onshore	Light & Medium
752	Iraq	2015	47.8405	44.2419	0	66.6924	65.31	389.172	28	Onshore	Shale & Tight Oil
753	Iraq	2015	44.46	47.4897	3.02975	68.541	32.12	389.172	34	Onshore	Light & Medium
754	Iraq	2015	44.7494	47.352	2.60265	73.4269	33	378.64	32	Onshore	Light & Medium
755	Iraq	2015	57.6356	47.0228	0	66.4781	75.19	389.172	24	Onshore	Shale & Tight Oil
756	Iraq	2015	44.2006	47.7112	3.51054	77.6821	212.51	499.617	34	Onshore	Light & Medium
757	Iraq	2015	43.8547	47.2263	3.37164	139.965	62.48	992.106	35	Onshore	Light & Medium
758	Libya	2015	40.8176	47.5439	6.7263	64.4699	14.6	500.65	26.1	Shallow water	Light & Medium
759	Oman	2015	21.7379	48.6179	26.88	78.4925	44.38	10	15	Onshore	Heavy
760	Qatar	2015	40.2458	46.6164	6.37063	34.9958	113.2	133.333	30	Shallow water	Light & Medium
761	Qatar	2015	47.0427	50.1174	3.07472	43.4177	92.61	119.579	40	Onshore	Light & Medium
762	Russian Federation	2015	45.5458	48.4939	2.94817	53.5222	61.59	187.195	30.25	Onshore	Light & Medium
763	Russian Federation	2015	44.0154	50.6023	6.58684	47.5581	44.71	187.195	33.21	Onshore	Light & Medium
764	Russian Federation	2015	44.3152	46.9293	2.6141	34.3558	113.24	6.56826	26.18	Onshore	Light & Medium
765	Russian Federation	2015	46.3794	51.4909	5.11143	43.2819	62.91	187.195	35.18	Onshore	Light & Medium
766	Saudi Arabia	2015	45.6936	48.4049	2.71133	31.1401	118.08	5.26316	37	Onshore	Light & Medium
767	Saudi Arabia	2015	39.2796	45.8167	6.53709	21.6042	54.75	5.26316	29	Shallow water	Light & Medium
768	Saudi Arabia	2015	43.1749	49.5026	6.32772	21.9456	84.72	5.26316	33	Shallow water	Light & Medium
769	Saudi Arabia	2015	39.4934	44.7932	5.29982	22.0374	293.46	0	27	Shallow water	Light & Medium
770	Saudi Arabia	2015	43.6882	49.5371	5.84884	23.1839	182.5	5.26316	33.5	Shallow water	Light & Medium
771	Saudi Arabia	2015	39.6053	44.7932	5.18794	19.972	297.69	5.26316	27	Shallow water	Light & Medium
772	Saudi Arabia	2015	48.5827	51.3348	2.75209	33.8184	295.65	5.26316	41.6	Onshore	Light & Medium
773	Saudi Arabia	2015	40.8959	46.6876	5.79173	19.1801	186.15	5.26316	32	Shallow water	Light & Medium
774	United Arab Emirates	2015	42.5321	48.1541	5.62201	30.5595	222.65	23.7554	34	Shallow water	Light & Medium
775	Venezuela	2015	21.5167	38.3078	16.7912	81.3545	37.69	280.529	10	Onshore	Heavy
776	Venezuela	2015	45.9507	49.4685	3.51784	74.0257	72.27	343.775	28	Onshore	Light & Medium
777	Venezuela	2015	22.0971	44.9036	22.8065	160.286	37.07	343.775	9.3	Onshore	Heavy
778	Venezuela	2015	23.0601	42.6201	19.56	159.765	43.8	343.775	8.3	Onshore	Heavy
779	Venezuela	2015	22.8543	41.748	18.8937	156.836	43.8	343.775	8.5	Onshore	Heavy
780	Venezuela	2015	18.5822	41.9252	23.343	127.514	56.55	10	8.5	Onshore	Heavy
781	Ecuador	2015	44.9813	49.4685	4.48726	43.2671	27.03	188.305	28	Onshore	Light & Medium
782	Saudi Arabia	2015	47.2735	48.1984	0.92488	31.0622	1801.79	5.26316	34	Onshore	Light & Medium
783	Congo	2015	48.6472	51.5012	2.85396	61.7149	0.01	410.266	26	Onshore	Light & Medium
784	Congo	2015	45.7267	52.4894	6.76273	51.4595	10.6	410.266	41	Shallow water	Light & Medium
785	Congo	2015	44.1375	50.946	6.80858	55.41	1.24	410.266	26.3	Shallow water	Light & Medium
786	Congo	2015	40.2898	47.0641	6.77429	55.3015	1.73	410.266	24.6	Shallow water	Light & Medium
787	Congo	2015	48.2618	52.4305	4.16872	61.8316	0.13	410.266	39.5	Onshore	Light & Medium
788	Congo	2015	44.6903	51.5449	6.85463	59.0811	9.56	410.266	35	Shallow water	Light & Medium
789	Nigeria	2015	53.1363	51.4174	0	66.9399	8.06	360.828	28	Deepwater	Light & Medium
790	Nigeria	2015	45.5246	52.332	6.80744	160.297	3.83	1679.97	40	Shallow water	Light & Medium
791	Egypt	2015	42.6265	49.4745	6.84806	48.1502	3.25	378.303	41.6	Shallow water	Light & Medium
792	Equatorial Guinea	2015	42.3965	51.1959	8.79944	36.8765	7.81	193.339	28	Onshore	Light & Medium
793	Angola	2015	45.2607	52.0369	6.77626	47.3017	1.36	221.742	37	Shallow water	Light & Medium
794	Libya	2015	49.1286	52.1501	3.02149	76.5548	9.12	585.106	38	Onshore	Light & Medium
795	Angola	2015	44.9264	51.6927	6.76631	47.7625	0.05	221.742	32	Shallow water	Light & Medium
796	Cameroon	2015	44.4092	51.2181	6.80892	118.849	0.77	1125.27	28	Shallow water	Light & Medium
797	United Kingdom	2015	31.1909	48.3672	17.1763	40.7461	4.47	173.689	19.4	Shallow water	Heavy
798	United Kingdom	2015	44.9466	51.6874	6.74082	37.8603	3.43	325.674	39	Shallow water	Light & Medium
799	United Kingdom	2015	44.2582	51.0885	6.83032	34.5372	2.98	132.431	30.3	Shallow water	Light & Medium
800	Spain	2015	44.9038	51.7514	6.84765	27.2371	0.22	26.445	38	Shallow water	Light & Medium
801	United Kingdom	2015	44.9969	51.8891	6.89221	38.8067	0.73	132.431	40	Shallow water	Light & Medium
802	United Kingdom	2015	45.1919	52.0142	6.82226	34.5571	1.41	132.431	38.6	Shallow water	Light & Medium
803	United Kingdom	2015	43.8943	50.6567	6.76238	96.3909	0.47	504.991	34	Shallow water	Light & Medium
804	United Kingdom	2015	44.2865	51.1858	6.89931	31.6257	0.22	132.431	33	Shallow water	Light & Medium
805	United Kingdom	2015	44.6395	51.4072	6.76775	39.2017	0.07	132.431	33	Shallow water	Light & Medium
806	United Kingdom	2015	45.3795	52.1351	6.75559	41.0866	3.1	137.193	41	Shallow water	Light & Medium
807	United Kingdom	2015	45.1897	52.01	6.8203	30.0229	1.8	132.431	35	Shallow water	Light & Medium
808	United Kingdom	2015	44.4568	51.2202	6.76338	45.7902	1.87	225.475	33.5	Shallow water	Light & Medium
809	Argentina	2015	47.9793	50.9104	2.93117	41.3481	2.88	98.4733	29	Onshore	Light & Medium
810	Venezuela	2015	47.6669	51.3384	3.67154	65.9275	1.82	343.775	32	Shallow water	Light & Medium
811	Colombia	2015	38.4912	44.9862	6.49496	131.023	0.23	78.8339	10.5	Onshore	Heavy
812	Brazil	2015	39.5747	48.6742	9.09954	24.866	3.06	50.8468	20	Shallow water	Heavy
813	Venezuela	2015	17.4412	43.219	25.7778	58.7816	10.22	343.775	17	Onshore	Heavy
814	Qatar	2015	43.6384	50.4152	6.77673	35.3748	2.25	56.5813	39.5	Shallow water	Light & Medium
815	United Arab Emirates	2015	43.6384	50.4152	6.77673	33.3641	2.25	23.7554	39.5	Shallow water	Light & Medium
816	Iraq	2015	43.1229	45.6043	2.48138	65.7903	5.11	389.172	42	Onshore	Light & Medium
817	Iraq	2015	42.8094	45.721	2.91153	60.2834	11.68	389.172	26	Onshore	Light & Medium
818	United States	2015	42.0751	48.9579	6.88287	58.9075	0.14	90.267	23.8	Shallow water	Light & Medium
819	Canada	2015	35.7274	41.6642	5.93683	106.578	2.83	2	10.5	Onshore	Sands
820	Mexico	2015	31.6747	47.8892	16.2145	59.9496	17.33	186.833	20.5	Onshore	Heavy
821	Australia	2015	35.5141	50.8383	15.3242	44.0726	1.23	285.797	18.3	Shallow water	Heavy
822	Russian Federation	2015	47.1915	51.53	4.33846	42.9568	10.59	187.195	38	Onshore	Light & Medium
823	United Kingdom	2015	42.0084	49.3063	7.29793	37.0774	1.46	275.054	25	Shallow water	Light & Medium
824	Venezuela	2015	29.3082	45.896	16.5878	60.8887	1.49	219.32	20.5	Shallow water	Heavy
825	Angola	2015	56.9811	50.3463	0	43.3541	74.58	221.742	23.7	Deepwater	Light & Medium
826	Azerbaijan	2015	45.6043	51.2546	5.65029	37.3478	231.44	3.0105	34	Shallow water	Light & Medium
827	Colombia	2015	48.5534	51.07	2.51652	37.2205	1.15	78.8339	35.5	Onshore	Light & Medium
828	Qatar	2015	37.584	44.4341	6.85003	26.9014	2.56	56.5813	25	Shallow water	Light & Medium
829	United Kingdom	2015	44.2507	50.9984	6.74774	436.097	2.47	4720.87	38	Shallow water	Light & Medium
830	United Kingdom	2015	44.3192	51.0673	6.74805	436.097	0.17	4720.87	39	Shallow water	Light & Medium
831	United Kingdom	2015	43.8575	50.7135	6.85601	436.097	2.97	4720.87	30	Shallow water	Light & Medium
832	United Kingdom	2015	44.2337	51.0379	6.80428	55.9362	0.94	269.029	36	Shallow water	Light & Medium
833	United Kingdom	2015	43.9526	50.7057	6.75311	55.9362	3.58	269.029	36	Shallow water	Light & Medium
834	United Kingdom	2015	44.1976	51.5449	7.34729	55.9362	0.57	269.029	35	Shallow water	Light & Medium
835	Denmark	2015	44.7679	51.5599	6.79197	25.3652	0.06	64.9926	32	Shallow water	Light & Medium
836	Denmark	2015	44.7679	51.5599	6.79197	25.3652	0.06	64.9926	32	Shallow water	Light & Medium
837	Nigeria	2015	54.6503	53.0349	0	45.1844	53.36	69.3936	48.28	Deepwater	Light & Medium
838	Nigeria	2015	54.3321	53.0349	0	45.1844	32.05	69.3936	48.28	Deepwater	Light & Medium
839	Venezuela	2015	29.4331	49.0998	19.6667	44.2543	26.28	10	22	Shallow water	Heavy
840	Angola	2015	53.7749	51.4072	0	46.3634	20.7	221.742	33	Deepwater	Light & Medium
841	Iran	2015	49.52	51.8651	2.34508	53.0483	0.4	298.549	30	Onshore	Light & Medium
842	Nigeria	2015	44.5466	51.3555	6.80893	156.598	8.33	1635.56	41.9	Shallow water	Light & Medium
843	Canada	2015	36.469	47.9895	11.5205	42.5273	1.9	40.0243	30	Onshore	Other Oil
844	Canada	2015	44.6813	48.3435	3.66221	42.5273	6.95	40.0243	34.5	Onshore	Light & Medium
845	Canada	2015	44.6029	47.7968	3.19384	42.5273	1.4	40.0243	27.2	Onshore	Light & Medium
846	Canada	2015	44.8516	47.934	3.08238	42.5273	6.79	40.0243	28.55	Onshore	Light & Medium
847	Canada	2015	44.3894	51.157	6.76761	42.5273	1.73	40.0243	35.8	Shallow water	Light & Medium
848	Canada	2015	48.8087	51.4668	2.65809	42.5273	0.34	40.0243	32.9	Onshore	Light & Medium
849	Canada	2015	46.0279	49.4042	3.37627	42.5273	1.6	40.0243	33.5	Onshore	Light & Medium
850	Canada	2015	45.0274	47.9168	2.88941	42.5273	6.27	40.0243	28.3	Onshore	Light & Medium
851	Canada	2015	44.6347	48.2506	3.61595	42.5273	9.06	40.0243	33.15	Onshore	Light & Medium
852	Canada	2015	32.4972	46.7101	14.2129	42.5273	0.2	40.0243	27.5	Onshore	Other Oil
853	Canada	2015	45.7284	48.2545	2.52614	42.5273	0.81	40.0243	33.85	Onshore	Light & Medium
854	Canada	2015	34.1963	43.8445	9.64814	41.2528	0.18	40.0243	10	Onshore	Heavy
855	Canada	2015	36.1662	48.7531	12.5869	42.5273	0.57	40.0243	33.05	Onshore	Other Oil
856	Cameroon	2015	34.3029	50.0069	15.704	92.9919	5.91	818.107	20.7	Shallow water	Heavy
857	Nigeria	2015	44.7498	51.5404	6.79061	46.9157	0.97	311.03	28.5	Shallow water	Light & Medium
858	Nigeria	2015	45.6836	52.1836	6.49995	56.4905	56.56	309.619	37.2	Shallow water	Light & Medium
859	Nigeria	2015	48.9757	52.0567	3.08097	83.6646	27.17	584.328	36	Onshore	Light & Medium
860	Egypt	2015	39.7583	46.3701	6.61183	59.9038	35.06	378.303	26.1	Shallow water	Light & Medium
861	Egypt	2015	43.0392	46.6607	3.62149	58.9303	16.22	378.303	30	Onshore	Light & Medium
862	Algeria	2015	49.7912	52.5729	2.78178	71.044	63.93	436.25	43.5	Onshore	Light & Medium
863	Nigeria	2015	44.999	51.7532	6.75423	69.3651	5.62	581.731	33.2	Shallow water	Light & Medium
864	Egypt	2015	45.6502	51.078	5.42782	60.6079	2.13	378.303	25	Onshore	Light & Medium
865	Egypt	2015	14.8014	45.1751	30.3737	62.3265	2.3	378.303	20	Onshore	Heavy
866	Equatorial Guinea	2015	44.8424	51.6901	6.84763	38.7708	14.71	193.339	35.5	Shallow water	Light & Medium
867	Egypt	2015	41.7279	49.1872	7.45928	59.7666	2.75	378.303	40	Onshore	Light & Medium
868	Libya	2015	40.7916	47.5232	6.73165	70.3124	13.63	585.106	25.8	Shallow water	Light & Medium
869	Egypt	2015	45.3882	50.0389	4.65076	63.0796	1.41	378.303	35	Onshore	Light & Medium
870	Egypt	2015	46.8037	52.4523	5.64862	41.4447	15.94	158.183	44	Onshore	Light & Medium
871	Egypt	2015	46.4909	52.7106	6.21968	60.622	10.57	378.303	45.5	Onshore	Light & Medium
872	Gabon	2015	43.7158	50.4876	6.77178	82.9667	6.44	648.093	30.9	Shallow water	Light & Medium
873	Nigeria	2015	46.5969	51.2546	4.65775	37.265	5.31	89.7892	34	Onshore	Light & Medium
874	Egypt	2015	48.4321	51.53	3.09786	59.8896	7.28	378.303	38	Onshore	Light & Medium
875	Libya	2015	49.5301	52.0836	2.55347	66.4167	4.33	455.4	38	Onshore	Light & Medium
876	Nigeria	2015	45.6086	52.0567	6.44812	59.6927	66.71	242.57	36	Shallow water	Light & Medium
877	Egypt	2015	43.0955	49.8666	6.77103	53.3734	0.7	378.303	37	Shallow water	Light & Medium
878	Nigeria	2015	45.1793	51.9465	6.76724	138.815	1.41	1218.35	34.4	Shallow water	Light & Medium
879	Gabon	2015	45.2816	52.1315	6.84989	66.0832	6.81	549.807	35.8	Shallow water	Light & Medium
880	Nigeria	2015	45.4787	52.2464	6.7677	64.4631	16.06	159.976	39.4	Shallow water	Light & Medium
881	Egypt	2015	42.9632	49.2561	6.29282	59.8805	1.97	378.303	41	Onshore	Light & Medium
882	Algeria	2015	48.1179	52.6762	4.5583	92.1626	36.23	557.116	45	Onshore	Light & Medium
883	Algeria	2015	43.8914	52.4009	8.50944	78.7123	0.46	557.116	41	Onshore	Light & Medium
884	Algeria	2015	47.8879	52.6762	4.78833	78.6788	9.42	557.116	45	Onshore	Light & Medium
885	Algeria	2015	47.5058	52.5385	5.03269	78.4166	10.27	557.116	43	Onshore	Light & Medium
886	Algeria	2015	46.5039	52.4697	5.96584	78.3588	14.63	557.116	42	Onshore	Light & Medium
887	Cameroon	2015	44.7505	51.5449	6.79441	115.955	1.24	1125.27	35	Shallow water	Light & Medium
888	Chad	2015	45.0779	51.289	6.21116	53.2589	7.7	294.671	34.5	Onshore	Light & Medium
889	Egypt	2015	48.2522	51.114	2.86172	57.8245	4.46	378.303	40	Onshore	Light & Medium
890	Egypt	2015	42.4159	49.0474	6.63157	54.3152	26.3	378.303	32.5	Shallow water	Light & Medium
891	Sudan	2015	46.3665	51.0159	4.64939	69.9975	22.33	501.968	33.75	Onshore	Light & Medium
892	Angola	2015	43.1742	49.8226	6.64835	40.1279	28.49	169.292	32.5	Shallow water	Light & Medium
893	Gabon	2015	40.8244	47.5789	6.75448	80.8616	4.41	648.093	25	Shallow water	Light & Medium
894	Angola	2015	47.235	50.9281	3.69312	41.9739	26.32	221.742	29.9	Deepwater	Light & Medium
895	Angola	2015	46.8679	50.8266	3.95875	44.4478	17.7	221.742	31	Deepwater	Light & Medium
896	Chad	2015	28.6093	50.85	22.2407	52.1916	26.73	294.671	20.4	Onshore	Heavy
897	Angola	2015	45.2773	52.0034	6.72615	42.175	13.86	221.742	37.8	Shallow water	Light & Medium
898	Angola	2015	42.7384	50.1895	7.45103	40.4016	27.21	221.742	28.5	Deepwater	Light & Medium
899	Tunisia	2015	46.5056	50.4765	3.97094	82.9574	1.68	766.493	42	Onshore	Light & Medium
900	Libya	2015	49.1768	51.5105	2.33366	44.6902	1.21	29.5703	34.5	Onshore	Light & Medium
901	Angola	2015	48.7151	50.7874	2.07234	46.6889	32.97	221.742	28.5	Deepwater	Light & Medium
902	Algeria	2015	46.9595	53.0204	6.06085	86.4312	43.25	557.116	50	Onshore	Light & Medium
903	Egypt	2015	47.4332	50.9197	3.48657	62.8301	7.86	378.303	37.5	Onshore	Light & Medium
904	Nigeria	2015	49.2462	51.9534	2.70726	82.0439	15.32	478.653	34.5	Onshore	Light & Medium
905	Algeria	2015	49.3381	52.8139	3.47579	57.582	12.61	261.328	47	Onshore	Light & Medium
906	Libya	2015	48.8662	51.53	2.66373	72.0231	72.84	443.923	38	Onshore	Light & Medium
907	Nigeria	2015	49.1762	51.7813	2.60511	233.979	5.53	2409.14	32	Onshore	Light & Medium
908	Cameroon	2015	44.1927	51.0457	6.85298	115.061	0.8	1125.27	30	Shallow water	Light & Medium
909	Nigeria	2015	48.9456	51.5021	2.55646	81.4014	9.15	206.564	29.23	Onshore	Light & Medium
910	Egypt	2015	48.251	51.761	3.51003	60.6354	10.03	368.375	42	Onshore	Light & Medium
911	Algeria	2015	46.5321	52.5385	6.00638	78.143	4.56	557.116	43	Onshore	Light & Medium
912	Sudan	2015	24.9268	50.6225	25.6958	103.647	25.96	501.968	21.6	Onshore	Heavy
913	Nigeria	2015	45.321	52.0621	6.74111	160.197	1.94	1659.15	36.4	Shallow water	Light & Medium
914	Democratic Republic of Congo	2015	44.8481	51.6323	6.78423	162.425	4.47	1663.59	30.8	Shallow water	Light & Medium
915	Egypt	2015	42.8793	49.6505	6.77113	54.7866	2.62	378.303	30	Shallow water	Light & Medium
916	Gabon	2015	48.8172	51.4216	2.60436	87.3413	1.24	648.093	31.6	Onshore	Light & Medium
917	Algeria	2015	49.7412	52.745	3.00385	140.132	159.51	551.384	46	Onshore	Light & Medium
918	Algeria	2015	51.0595	53.7087	2.64922	124.087	12.08	557.116	60	Onshore	Light & Medium
919	Egypt	2015	37.783	44.6005	6.81743	53.4199	1.92	378.303	24.2	Shallow water	Light & Medium
920	Angola	2015	50.5986	50.6321	0.0334639	39.8373	3.47	221.742	33	Deepwater	Light & Medium
921	Nigeria	2015	48.9569	51.3647	2.4078	71.2339	6.54	295.585	35.6	Onshore	Light & Medium
922	Libya	2015	49.514	51.8891	2.37507	80.6479	2.02	585.106	40	Onshore	Light & Medium
923	Nigeria	2015	45.2839	51.9878	6.70395	204.304	12.15	1989.31	35	Shallow water	Light & Medium
924	Egypt	2015	46.1654	51.8065	5.64108	58.2945	6.08	378.303	38.8	Onshore	Light & Medium
925	Angola	2015	41.5595	51.3115	9.75197	36.5579	35.19	153.757	30	Deepwater	Light & Medium
926	Algeria	2015	48.1707	52.6865	4.51585	78.3992	5.84	557.116	45.15	Onshore	Light & Medium
927	Angola	2015	44.815	51.5772	6.76219	50.0713	0.43	221.742	30	Shallow water	Light & Medium
928	Democratic Republic of Congo	2015	47.4398	51.7218	4.28196	170.829	3.43	1663.59	32.1	Onshore	Light & Medium
929	Angola	2015	44.8316	51.5428	6.71119	45.2588	14.85	221.742	29.5	Shallow water	Light & Medium
930	Angola	2015	44.3976	51.3085	6.91086	45.779	15.29	221.742	38	Shallow water	Light & Medium
931	Libya	2015	49.5019	51.904	2.40217	83.8955	19.78	585.106	37	Onshore	Light & Medium
932	Cote d'Ivoire	2015	45.364	52.1204	6.75647	41.6805	0.25	226.91	39.5	Shallow water	Light & Medium
933	Gabon	2015	47.4595	51.919	4.45953	82.2845	7.8	648.093	34	Onshore	Light & Medium
934	Nigeria	2015	45.5094	52.1393	6.62992	80.605	30.79	93.8791	37.2	Shallow water	Light & Medium
935	Libya	2015	48.6708	51.8891	3.21832	56.5539	3.47	357.181	40	Onshore	Light & Medium
936	Egypt	2015	41.2981	48.2924	6.99426	52.4439	1.28	378.303	27	Shallow water	Light & Medium
937	Angola	2015	45.2185	51.9705	6.75198	46.6806	15.87	221.742	37	Shallow water	Light & Medium
938	Nigeria	2015	45.1336	52.0124	6.87875	65.7578	6.39	405.455	36	Shallow water	Light & Medium
939	Gabon	2015	46.8524	49.4634	2.61101	89.214	0.59	648.093	30.5	Onshore	Light & Medium
940	Algeria	2015	48.75	52.7175	3.96751	78.1571	3.88	557.116	45.6	Onshore	Light & Medium
941	Nigeria	2015	44.4324	51.3085	6.87605	96.4525	4.02	874.53	38	Shallow water	Light & Medium
942	Equatorial Guinea	2015	44.6495	51.3085	6.65901	39.62	35.5	193.339	30.6	Shallow water	Light & Medium
943	Nigeria	2015	49.5746	52.8827	3.30812	62.569	0.08	315.006	48	Onshore	Light & Medium
944	Algeria	2015	46.4907	52.332	5.84132	78.5022	1.93	557.116	40	Onshore	Light & Medium
945	Egypt	2015	41.9169	46.9597	5.04274	59.8665	2.26	378.303	26.3	Onshore	Light & Medium
946	Egypt	2015	38.4025	45.1823	6.77979	53.4186	0.78	378.303	23	Shallow water	Light & Medium
947	Gabon	2015	41.6963	48.5372	6.84094	74.0495	7.48	648.093	46	Shallow water	Light & Medium
948	Gabon	2015	44.0647	50.8507	6.78605	79.1648	2.3	648.093	31.35	Shallow water	Light & Medium
949	Egypt	2015	49.2322	51.8203	2.58805	59.9411	0.33	378.303	39	Onshore	Light & Medium
950	Egypt	2015	25.7747	42.8793	17.1046	62.3284	1.95	378.303	18.5	Onshore	Heavy
951	Egypt	2015	46.5173	49.2974	2.78008	55.1148	0.66	378.303	41.6	Onshore	Light & Medium
952	Indonesia	2015	45.8882	52.6517	6.76347	57.7453	1.44	340.765	44	Shallow water	Light & Medium
953	Indonesia	2015	49.0368	52.2141	3.17725	76.0649	8.44	340.765	37	Onshore	Light & Medium
954	India	2015	47.4544	51.6137	4.15932	53.7843	32.85	243.064	36	Onshore	Shale & Tight Oil
955	India	2015	45.2936	50.8368	5.54324	44.0691	62.16	205.919	26	Onshore	Light & Medium
956	China	2015	45.5186	50.1766	4.65798	39.078	9.12	46.593	37	Onshore	Light & Medium
957	Afghanistan	2015	43.39	46.3973	3.00735	42.3083	0.59	154.717	31	Onshore	Light & Medium
958	China	2015	47.4505	51.773	4.32248	36.6043	275.9	43.4235	32.2	Onshore	Light & Medium
959	India	2015	45.7821	51.9729	6.19081	46.1227	119.98	243.064	38	Shallow water	Light & Medium
960	India	2015	47.9973	51.0655	3.06814	50.9449	10.58	243.064	29	Onshore	Light & Medium
961	China	2015	44.5005	49.6056	5.10509	37.8258	192.36	46.593	24.2	Onshore	Light & Medium
962	China	2015	32.2568	50.7512	18.4944	38.0059	27.05	46.593	18	Onshore	Heavy
963	India	2015	49.4541	52.1058	2.65169	49.8058	2.3	243.064	38	Onshore	Light & Medium
964	India	2015	47.7955	51.4761	3.68061	57.126	23.72	243.064	34	Onshore	Light & Medium
965	Indonesia	2015	48.2874	51.7852	3.49784	58.0001	1.11	340.765	32.7	Onshore	Light & Medium
966	Indonesia	2015	48.8709	51.7709	2.89999	58.754	1.57	340.765	34.1	Onshore	Light & Medium
967	China	2015	44.2399	50.9494	6.70948	27.022	48.82	46.593	36	Shallow water	Light & Medium
968	China	2015	46.1235	50.5689	4.44546	24.7634	6.73	46.593	20.5	Shallow water	Heavy
969	Thailand	2015	46.6251	52.5385	5.91346	38.1683	0.19	86.5335	43	Onshore	Light & Medium
970	Pakistan	2015	50.1797	52.6813	2.50154	62.5455	0.29	488.119	42.5	Onshore	Light & Medium
971	China	2015	44.7776	51.6532	6.8756	25.1151	9.34	46.593	34	Shallow water	Light & Medium
972	Pakistan	2015	50.0892	52.7363	2.64711	59.6844	1.94	377.06	43.3	Onshore	Light & Medium
973	China	2015	43.2564	47.8123	4.55588	38.8682	4.38	46.593	30	Onshore	Light & Medium
974	China	2015	46.8447	51.8083	4.96355	38.4645	8.76	46.593	34	Onshore	Light & Medium
975	Malaysia	2015	45.4808	52.2386	6.7578	64.6496	4.92	519.859	38	Shallow water	Light & Medium
976	China	2015	45.4521	52.4	6.9479	27.3313	2.96	46.593	39.7	Shallow water	Light & Medium
977	China	2015	45.4609	52.2141	6.75321	58.7539	2.92	404.035	37	Shallow water	Light & Medium
978	Pakistan	2015	49.6011	52.7363	3.13524	64.4736	0.15	471.042	43.3	Onshore	Light & Medium
979	China	2015	40.3693	50.665	10.2957	25.013	6.75	46.593	19	Shallow water	Heavy
980	China	2015	42.0182	50.6111	8.59296	44.1657	15.47	46.593	15	Shallow water	Heavy
981	Indonesia	2015	48.8303	52.0962	3.26591	56.9396	0.46	340.765	34	Onshore	Light & Medium
982	Indonesia	2015	47.7022	51.2226	3.52042	43.805	1.35	192.974	34.5	Onshore	Light & Medium
983	India	2015	45.2032	51.9729	6.76964	45.5588	8.32	243.064	38	Shallow water	Light & Medium
984	Indonesia	2015	45.4482	52.1477	6.69943	50.8203	14.6	332.068	37	Shallow water	Light & Medium
985	Indonesia	2015	33.4444	41.1076	7.6632	56.3214	1.22	340.765	18.5	Onshore	Heavy
986	Thailand	2015	45.6078	52.332	6.72424	36.6083	13.7	86.5335	40	Shallow water	Light & Medium
987	Malaysia	2015	45.4771	52.3937	6.91654	63.2865	3.28	519.859	38	Shallow water	Light & Medium
988	China	2015	39.9165	50.4435	10.527	24.7385	25.18	46.593	19	Shallow water	Heavy
989	Indonesia	2015	49.6477	52.1501	2.50239	57.5358	2.67	340.765	38	Onshore	Light & Medium
990	Vietnam	2015	45.5816	52.4673	6.88574	41.341	11.25	274.564	41	Shallow water	Light & Medium
991	China	2015	45.4515	52.3051	6.85357	28.1583	6.2	46.593	38	Shallow water	Light & Medium
992	Norway	2015	44.3663	51.1708	6.80456	25.64	16.24	16.6896	36	Shallow water	Light & Medium
993	Norway	2015	43.9918	50.8955	6.90368	24.8193	4.56	16.6896	32	Shallow water	Light & Medium
994	Norway	2015	43.0962	49.8773	6.78115	25.6093	16.1	20.799	23	Shallow water	Light & Medium
995	Norway	2015	45.2198	51.8598	6.63992	32.5788	26.4	16.6896	37	Shallow water	Light & Medium
996	Norway	2015	44.7803	51.5497	6.76942	31.0188	12.3	16.6896	37	Shallow water	Light & Medium
997	Norway	2015	44.9846	51.7023	6.71772	27.3819	17.44	16.6896	36	Shallow water	Light & Medium
998	Norway	2015	45.4181	52.2333	6.81519	18.5495	21.68	16.6896	45	Shallow water	Light & Medium
999	Norway	2015	44.5022	51.6508	7.14869	22.7317	5.98	16.6896	33	Shallow water	Light & Medium
1000	Romania	2015	48.8667	51.4072	2.54058	40.4718	22.05	38.7132	33	Onshore	Light & Medium
1001	Austria	2015	48.3175	50.8565	2.53904	45.2531	6.2	2.28162	25	Onshore	Light & Medium
1002	Germany	2015	45.0727	47.7112	2.63844	107.053	3.54	1.81115	34	Onshore	Light & Medium
1003	Germany	2015	49.2805	51.7125	2.432	32.4418	0.27	1.81115	31	Onshore	Light & Medium
1004	Germany	2015	33.7519	48.2274	14.4756	39.9222	1.36	1.81115	41.5	Onshore	Other Oil
1005	United Kingdom	2015	45.4634	52.2189	6.75551	63.0447	1.41	435.984	39	Shallow water	Light & Medium
1006	Hungary	2015	47.3254	49.857	2.5316	43.117	4.03	14.9468	33	Onshore	Light & Medium
1007	Austria	2015	49.016	51.717	2.70098	38.4265	1.23	2.28162	37.5	Onshore	Light & Medium
1008	United Kingdom	2015	44.7665	51.53	6.76349	48.8945	0.77	217.256	38	Shallow water	Light & Medium
1009	Poland	2015	39.3942	46.2537	6.85953	23.4095	2.46	47.0669	45	Shallow water	Light & Medium
1010	France	2015	47.9031	50.7681	2.86507	35.4523	0.19	37.8789	30.15	Onshore	Light & Medium
1011	United Kingdom	2015	44.8245	51.8203	6.99572	32.9526	9.34	132.431	39	Shallow water	Light & Medium
1012	Romania	2015	49.2936	51.7858	2.49225	41.5372	1.08	39.0865	38.5	Onshore	Light & Medium
1013	Bulgaria	2015	49.385	51.7514	2.36638	48.118	0.06	154.717	38	Onshore	Light & Medium
1014	Croatia	2015	48.9301	51.4611	2.53102	37.7322	0.83	65.6592	37	Onshore	Light & Medium
1015	Netherlands	2015	47.0802	49.444	2.36374	30.5298	0.98	11.9204	27	Onshore	Light & Medium
1016	Poland	2015	48.5869	50.9763	2.38944	59.6318	0.28	46.0289	38	Onshore	Light & Medium
1017	Poland	2015	31.1859	45.5654	14.3794	42.7854	0.62	47.0669	35	Onshore	Other Oil
1018	Germany	2015	45.0083	47.3498	2.34145	41.8081	0.82	1.81115	28.75	Onshore	Light & Medium
1019	Norway	2015	45.3516	52.1255	6.77388	24.1417	7.22	16.6896	37	Shallow water	Light & Medium
1020	Norway	2015	44.8898	51.6826	6.79276	25.9601	12.9	16.6896	37	Shallow water	Light & Medium
1021	France	2015	47.39	50.6372	3.2472	33.9508	1.97	37.8789	30.5	Onshore	Light & Medium
1022	United Kingdom	2015	44.2374	51.0086	6.77117	40.1767	1.06	205.152	33	Shallow water	Light & Medium
1023	Croatia	2015	49.002	51.6826	2.68059	38.9714	2.85	65.7326	37	Onshore	Light & Medium
1024	France	2015	42.2196	44.8447	2.62509	42.1834	1.52	37.8789	30	Onshore	Light & Medium
1025	Denmark	2015	45.1079	51.9729	6.86495	34.1621	0.26	64.9926	38	Shallow water	Light & Medium
1026	France	2015	48.3463	51.4	3.05373	40.0842	0.4	37.8789	30	Onshore	Light & Medium
1027	United Kingdom	2015	44.7678	51.53	6.76216	79.9509	0.89	543.414	38	Shallow water	Light & Medium
1028	France	2015	49.1072	51.6631	2.55596	37.9458	0.06	37.8789	33.5	Onshore	Light & Medium
1029	France	2015	47.2872	50.6614	3.37418	33.0272	0.35	37.8789	28.6	Onshore	Light & Medium
1030	France	2015	48.6587	51.7388	3.08016	37.9259	0.72	37.8789	34.6	Onshore	Light & Medium
1031	Netherlands	2015	45.4525	52.2704	6.81785	24.9545	0.58	11.9204	42	Shallow water	Light & Medium
1032	Croatia	2015	47.8845	50.8416	2.95711	35.9631	0.23	65.7326	28	Onshore	Light & Medium
1033	United Kingdom	2015	44.9918	51.7514	6.75961	111.941	3.26	754.427	38	Shallow water	Light & Medium
1034	United Kingdom	2015	45.61	52.3661	6.75615	47.2917	2.04	269.399	45	Shallow water	Light & Medium
1035	Norway	2015	45.4354	52.1716	6.73619	25.8583	11.46	10.7061	39.6	Shallow water	Light & Medium
1036	Germany	2015	49.5703	52.1462	2.57583	38.0988	0.17	1.81115	37.3	Onshore	Light & Medium
1037	Norway	2015	45.4307	51.9501	6.51946	23.6014	57.45	9.26518	39.6	Shallow water	Light & Medium
1038	Norway	2015	44.9627	51.7245	6.76177	26.1558	0.61	16.6896	36	Shallow water	Light & Medium
1039	Norway	2015	45.0068	51.8203	6.81345	27.4591	9.78	16.6896	39	Shallow water	Light & Medium
1040	United Kingdom	2015	44.5012	51.3085	6.80727	32.8804	2.76	132.431	38	Shallow water	Light & Medium
1041	United Kingdom	2015	45.3495	52.1106	6.7611	35.0683	5.81	152.058	40	Shallow water	Light & Medium
1042	United Kingdom	2015	44.5017	51.4955	6.99387	21.6044	19.65	35.9634	37.5	Shallow water	Light & Medium
1043	Poland	2015	41.5624	46.0472	4.48478	37.5517	2.92	47.0669	42	Onshore	Light & Medium
1044	Norway	2015	45.5143	52.5793	7.06501	34.6963	22.09	16.6896	60	Shallow water	Light & Medium
1045	Norway	2015	45.5788	52.332	6.75321	27.1565	0.62	16.6896	40	Shallow water	Light & Medium
1046	Denmark	2015	44.8233	51.5599	6.73655	22.47	21.06	10.0665	32	Shallow water	Light & Medium
1047	United Kingdom	2015	34.5091	50.5606	16.0514	28.2101	3.87	71.0518	20.7	Shallow water	Heavy
1048	Netherlands	2015	32.2708	49.9856	17.7148	24.6389	0.84	11.9204	22	Shallow water	Heavy
1049	Norway	2015	43.6739	50.3693	6.69542	26.2654	19.44	16.6896	25	Shallow water	Light & Medium
1050	Ukraine	2015	48.2044	50.8895	2.68516	62.3241	0.32	378.695	48	Onshore	Light & Medium
1051	Germany	2015	49.1723	51.8846	2.71231	37.3964	0.08	1.81115	33.5	Onshore	Light & Medium
1052	Croatia	2015	50.1647	52.9216	2.75696	40.8471	0.13	65.7326	55	Onshore	Light & Medium
1053	France	2015	45.1451	47.4622	2.31707	35.8318	0.12	37.8789	33.6	Onshore	Light & Medium
1054	Romania	2015	44.9284	51.6826	6.7542	29.1507	1.92	39.0865	37	Shallow water	Light & Medium
1055	United Kingdom	2015	45.1222	51.8645	6.74235	32.7711	4.23	158.428	39	Shallow water	Light & Medium
1056	United Kingdom	2015	42.7645	49.7193	6.95481	52.1173	0.74	132.431	31	Shallow water	Light & Medium
1057	United Kingdom	2015	44.7523	51.5024	6.75008	34.5826	0.03	132.431	37.6	Shallow water	Light & Medium
1058	Norway	2015	44.7975	51.55	6.75245	99.9896	4.36	63.2654	32.5	Shallow water	Light & Medium
1059	Greece	2015	34.8583	41.6239	6.76555	35.5534	0.84	154.717	26	Shallow water	Light & Medium
1060	Germany	2015	48.2757	50.6201	2.34444	44.0328	0.05	1.81115	28	Onshore	Light & Medium
1061	Ukraine	2015	43.177	49.9258	6.74884	62.2886	0.49	378.695	34	Shallow water	Light & Medium
1062	Norway	2015	44.7841	51.532	6.74794	34.8913	24.86	16.6896	36.1	Shallow water	Light & Medium
1063	Norway	2015	46.462	53.0608	6.59883	27.8757	39.45	16.6896	49.3	Shallow water	Light & Medium
1064	Norway	2015	44.8243	51.6749	6.85069	26.2745	1.63	16.6896	33.35	Shallow water	Light & Medium
1065	Denmark	2015	45.1043	51.904	6.79971	52.4606	1.28	118.548	37	Shallow water	Light & Medium
1066	Norway	2015	67.7515	50.4435	0	21.7903	12.78	16.6896	19	Shallow water	Heavy
1067	United Kingdom	2015	44.1165	50.8805	6.76397	119.193	1.08	1089.66	35	Shallow water	Light & Medium
1068	Norway	2015	44.7789	51.2672	6.48822	23.4023	52.59	16.6896	30	Shallow water	Light & Medium
1069	Norway	2015	45.668	52.4398	6.77178	24.0424	20.14	16.6896	48	Shallow water	Light & Medium
1070	Norway	2015	45.0338	51.8553	6.82142	63.6393	2.11	36.4293	37.9	Shallow water	Light & Medium
1071	Norway	2015	45.6909	52.5559	6.865	28.9256	14.15	16.6896	41	Shallow water	Light & Medium
1072	Norway	2015	44.893	51.6604	6.76745	27.1043	4.01	16.6896	37	Shallow water	Light & Medium
1073	Norway	2015	44.7629	51.5105	6.74761	31.1639	19.54	16.6896	34.5	Shallow water	Light & Medium
1074	Argentina	2015	47.1256	50.8266	3.701	42.4685	4.78	98.4733	31	Onshore	Light & Medium
1075	Colombia	2015	14.9735	47.3385	32.365	107.966	13.36	78.8339	12.5	Onshore	Heavy
1076	Colombia	2015	46.0299	49.4146	3.38478	44.1895	18.97	78.8339	24	Onshore	Light & Medium
1077	Venezuela	2015	45.3537	47.7141	2.36049	63.9432	0.03	343.775	26	Onshore	Light & Medium
1078	Venezuela	2015	37.8978	46.4721	8.57436	63.2163	4.27	343.775	16	Onshore	Heavy
1079	Argentina	2015	40.9792	50.8611	9.88182	43.3611	10.76	98.4733	31.5	Onshore	Shale & Tight Oil
1080	Argentina	2015	50.5482	53.1671	2.6189	42.2189	0.6	98.4733	65	Onshore	Light & Medium
1081	Argentina	2015	47.9405	50.8129	2.87233	42.4246	2.92	98.4733	30.8	Onshore	Light & Medium
1082	Ecuador	2015	29.2476	46.9363	17.6888	45.4533	10.72	188.305	22.1	Onshore	Heavy
1083	Venezuela	2015	46.6462	49.1627	2.51644	66.6674	0.4	343.775	39	Onshore	Light & Medium
1084	Venezuela	2015	41.6427	48.4055	6.76277	60.9849	0.97	343.775	28	Shallow water	Light & Medium
1085	Ecuador	2015	29.5259	46.4476	16.9217	45.3018	8.92	188.305	15	Onshore	Heavy
1086	Argentina	2015	47.8193	51.4462	3.6269	39.5108	1.21	98.4733	40	Onshore	Light & Medium
1087	Trinidad and Tobago	2015	43.2619	49.9168	6.65494	101.517	4.65	204.61	21	Onshore	Heavy
1088	Ecuador	2015	37.2866	46.4476	9.16097	44.2363	2.53	188.305	15	Onshore	Heavy
1089	Colombia	2015	13.4251	46.502	33.077	48.8503	78.87	78.8339	10	Onshore	Heavy
1090	Colombia	2015	47.8853	50.9365	3.05119	41.2313	15.05	155.136	29.7	Onshore	Light & Medium
1091	Colombia	2015	45.22	52.074	6.85407	37.719	0.36	78.8339	34	Onshore	Light & Medium
1092	Colombia	2015	45.0707	48.4007	3.32995	33.5905	3.03	35.4379	26	Onshore	Light & Medium
1093	Argentina	2015	47.3457	50.8685	3.52286	45.8363	1.87	98.4733	30	Onshore	Light & Medium
1094	Argentina	2015	46.7458	50.8955	4.14962	41.9263	4.4	98.4733	32	Onshore	Light & Medium
1095	Colombia	2015	46.5132	50.6201	4.10694	39.5641	2.5	78.8339	28	Onshore	Light & Medium
1096	Argentina	2015	47.5616	51.078	3.51646	46.2313	9.91	92.9196	25	Onshore	Light & Medium
1097	Venezuela	2015	38.2278	48.2438	10.016	62.9843	14.8	286.258	16	Onshore	Heavy
1098	Argentina	2015	48.8491	51.4117	2.56267	42.81	1.45	98.4733	39.5	Onshore	Light & Medium
1099	Brazil	2015	44.806	50.0227	5.21672	24.2855	8.78	50.8468	19	Deepwater	Heavy
1100	Venezuela	2015	44.9681	47.5735	2.6054	68.4858	0.59	312.015	32	Onshore	Light & Medium
1101	Colombia	2015	13.3185	48.0206	34.702	42.5233	21.59	78.8339	13.4	Onshore	Heavy
1102	Suriname	2015	28.7624	49.5307	20.7683	43.6376	6.19	154.717	17	Onshore	Heavy
1103	Argentina	2015	47.064	51.4222	4.35818	49.6647	9.21	75.6077	30	Onshore	Light & Medium
1104	Argentina	2015	48.7599	51.6527	2.89274	39.7162	2.04	98.4733	43	Onshore	Light & Medium
1105	Colombia	2015	21.7335	50.237	28.5035	36.8158	1.03	78.8339	16	Onshore	Heavy
1106	Colombia	2015	47.2284	50.806	3.57763	37	2	78.8339	30.7	Onshore	Light & Medium
1107	Peru	2015	35.4812	50.0494	14.5682	47.4526	3.47	194.179	18.1	Onshore	Shale & Tight Oil
1108	Peru	2015	36.6603	50.7371	14.0768	47.4496	2.81	194.179	29.7	Onshore	Shale & Tight Oil
1109	Colombia	2015	20.5241	49.4739	28.9498	35.6043	6.49	78.8339	21	Onshore	Heavy
1110	Brazil	2015	38.9043	50.2266	11.3223	25.5496	13.55	50.8468	25.5	Deepwater	Light & Medium
1111	Argentina	2015	28.9707	50.0006	21.0299	135.066	9.57	98.4733	19	Onshore	Heavy
1112	Argentina	2015	48.21	51.102	2.89197	41.0004	2.71	98.4733	35	Onshore	Light & Medium
1113	Argentina	2015	47.9732	51.102	3.12883	41.4673	6.97	98.4733	35	Onshore	Light & Medium
1114	Trinidad and Tobago	2015	33.1013	49.9168	16.8155	50.4688	7.83	204.61	21	Shallow water	Heavy
1115	Colombia	2015	46.0529	49.69	3.63703	41.1772	1.18	78.8339	28	Onshore	Light & Medium
1116	Venezuela	2015	46.7102	50.0784	3.36829	63.8597	6.27	343.775	33	Onshore	Light & Medium
1117	Venezuela	2015	50.3916	52.7648	2.37316	83.7303	0.1	310.77	45	Onshore	Light & Medium
1118	Argentina	2015	48.2089	51.102	2.89306	67.3856	4.5	98.4733	35	Onshore	Light & Medium
1119	Venezuela	2015	37.2509	46.7475	9.49661	69.886	5.83	343.775	20	Onshore	Heavy
1120	Argentina	2015	48.0604	51.0092	2.94881	76.8105	4.12	98.4733	24	Onshore	Light & Medium
1121	Argentina	2015	47.6073	51.0092	3.40183	61.1093	5.35	98.4733	24	Onshore	Light & Medium
1122	Brazil	2015	29.7889	50.8416	21.0527	22.9267	4.7	33.39	28	Deepwater	Light & Medium
1123	Ecuador	2015	42.8285	49.1932	6.36472	44.248	8.84	188.305	24	Onshore	Light & Medium
1124	Colombia	2015	41.0622	49.4347	8.37251	37.2011	0.1	78.8339	18.5	Onshore	Heavy
1125	Colombia	2015	45.9531	50.6507	4.69756	35.4281	4.3	78.8339	27.8	Onshore	Light & Medium
1126	Colombia	2015	43.8917	49.7998	5.90811	35.0404	0.42	78.8339	26.7	Onshore	Light & Medium
1127	Argentina	2015	45.053	51.7903	6.73732	30.847	3.58	98.4733	45	Shallow water	Light & Medium
1128	Ecuador	2015	23.8996	48.849	24.9493	45.119	2.55	188.305	19	Onshore	Heavy
1129	Colombia	2015	46.1768	49.6336	3.45677	69.63	14.55	78.8339	25.25	Onshore	Light & Medium
1130	Brazil	2015	49.4561	50.1278	0.671721	25.2459	38.45	50.8468	23.1	Deepwater	Light & Medium
1131	Brazil	2015	42.6136	49.7962	7.18259	30.7878	61.45	50.8468	21.5	Deepwater	Heavy
1132	Argentina	2015	40.1807	50.8715	10.6908	39.0037	2.2	98.4733	22	Onshore	Heavy
1133	Ecuador	2015	32.3168	48.9109	16.5942	44.8911	1.33	188.305	19.9	Onshore	Heavy
1134	Colombia	2015	40.2742	46.2333	5.95909	37.0477	1.08	78.8339	25.4	Onshore	Light & Medium
1135	Peru	2015	48.07	50.689	2.61892	58.2691	0.45	194.179	29	Onshore	Light & Medium
1136	Peru	2015	49.3668	52.6612	3.29441	45.2499	1.49	194.179	42.53	Onshore	Light & Medium
1137	Colombia	2015	31.4897	47.2173	15.7277	37.952	1.74	78.8339	22	Onshore	Heavy
1138	Argentina	2015	48.3226	50.9793	2.65671	40.4885	2.12	17.6589	30	Onshore	Light & Medium
1139	Argentina	2015	50.6578	53.0294	2.37163	42.0295	0.26	98.4733	63	Onshore	Light & Medium
1140	Peru	2015	44.4881	51.2397	6.7516	42.1917	4	194.179	37	Shallow water	Light & Medium
1141	Argentina	2015	42.2811	52.1345	9.85346	39.3811	8.2	98.4733	50	Onshore	Shale & Tight Oil
1142	Argentina	2015	37.0046	51.3085	14.3039	39.1877	0.88	98.4733	38	Onshore	Other Oil
1143	Argentina	2015	49.8457	52.2722	2.42651	40.3832	1.05	98.4733	52	Onshore	Light & Medium
1144	Argentina	2015	48.8875	51.515	2.62752	39.3883	1.05	98.4733	41	Onshore	Light & Medium
1145	Venezuela	2015	47.2233	49.6505	2.42714	80.4352	0.07	343.775	30	Onshore	Light & Medium
1146	Argentina	2015	46.8837	50.961	4.0773	63.5165	7.62	87.8198	23.3	Onshore	Light & Medium
1147	Colombia	2015	47.1023	50.1993	3.09704	36.0778	0.24	78.8339	28	Onshore	Light & Medium
1148	Colombia	2015	46.2841	50.4163	4.13227	35.8991	1.57	78.8339	28.9	Onshore	Light & Medium
1149	Argentina	2015	47.6733	51.3384	3.66508	41.6184	2	98.4733	32	Onshore	Light & Medium
1150	Peru	2015	36.5362	51.2397	14.7034	48.0211	3.9	194.179	37	Onshore	Shale & Tight Oil
1151	Brazil	2015	46.1239	50.3693	4.24544	47.5201	28.6	50.8468	25	Deepwater	Light & Medium
1152	Ecuador	2015	16.5204	46.8606	30.3402	43.5469	7.3	188.305	21	Onshore	Heavy
1153	Ecuador	2015	44.1425	49.4685	5.32606	44.0468	5.53	188.305	28	Onshore	Light & Medium
1154	Peru	2015	31.9578	47.5794	15.6217	44.8064	0.55	194.179	16	Onshore	Shale & Tight Oil
1155	Trinidad and Tobago	2015	44.4611	51.2007	6.73962	43.6424	4.52	204.61	30	Shallow water	Light & Medium
1156	Argentina	2015	48.1006	51.102	3.0014	40.9864	0.34	98.4733	35	Onshore	Light & Medium
1157	Argentina	2015	49.0201	51.5838	2.56371	39.1885	0.32	98.4733	42	Onshore	Light & Medium
1158	Brazil	2015	42.6157	52.0321	9.41642	32.7992	5.44	50.8468	35	Deepwater	Light & Medium
1159	Ecuador	2015	31.988	46.0762	14.0882	43.7798	4.17	188.305	19.9	Onshore	Heavy
1160	Colombia	2015	34.9473	49.031	14.0836	46.5207	6.51	78.8339	21	Onshore	Heavy
1161	Qatar	2015	43.1597	50.1174	6.95767	28.4524	1.94	56.5813	40	Shallow water	Light & Medium
1162	Iran	2015	41.839	45.0147	3.17566	56.2765	77.77	266.539	27	Onshore	Light & Medium
1163	Iran	2015	43.1189	46.8478	3.72885	50.5216	67.2	162.721	29.5	Onshore	Light & Medium
1164	Kuwait	2015	42.1711	45.3244	3.15338	36.4908	274.77	27.8146	31.5	Onshore	Light & Medium
1165	Kuwait	2015	42.3411	46.2842	3.94307	35.0814	179.22	27.8146	30	Onshore	Light & Medium
1166	Iraq	2015	41.1926	45.0985	3.90587	63.5698	15.08	389.172	25	Onshore	Light & Medium
1167	Syria	2015	35.8182	50.8853	15.0671	185.791	2.92	1866.97	37	Onshore	Shale & Tight Oil
1168	Saudi Arabia	2015	45.4545	48.4737	3.01924	28.8158	442.39	6.92879	38	Onshore	Light & Medium
1169	Kuwait	2015	43.853	46.3973	2.54434	29.5973	578.83	19.0626	31	Onshore	Light & Medium
1170	Oman	2015	42.2264	45.4277	3.20133	59.5241	215.11	237.829	33	Onshore	Light & Medium
1171	Syria	2015	35.1738	50.8509	15.6771	186.004	0.66	1866.97	36.5	Onshore	Shale & Tight Oil
1172	Syria	2015	48.4047	51.023	2.61826	161.598	2.76	1569.65	39	Onshore	Light & Medium
1173	Yemen	2015	49.6488	52.5828	2.93399	144.653	3.75	1384.11	43	Onshore	Light & Medium
1174	Oman	2015	47.6635	52.0268	4.36325	75.842	31.77	247.215	42	Onshore	Light & Medium
1175	Yemen	2015	49.6196	52.2165	2.59692	145.995	4.89	1384.11	38	Onshore	Light & Medium
1176	Syria	2015	42.1992	44.5867	2.38751	166.035	3.27	1591.08	24	Onshore	Light & Medium
1177	Iran	2015	43.2247	49.4434	6.21873	50.2879	104.46	240.788	36	Shallow water	Light & Medium
1178	Iraq	2015	43.3835	46.6338	3.25027	73.9545	44.76	389.172	28	Onshore	Light & Medium
1179	Yemen	2015	45.3034	47.7061	2.4027	145.229	0.07	1384.11	29.1	Onshore	Light & Medium
1180	Iran	2015	45.1155	47.9608	2.84523	58.8342	21.55	298.19	32.8	Onshore	Light & Medium
1181	Oman	2015	44.8181	50.27	5.45194	32.3654	17.5	35.0673	39	Onshore	Light & Medium
1182	Yemen	2015	48.021	50.5884	2.56737	146.04	4.12	1384.11	31.4	Onshore	Light & Medium
1183	Iraq	2015	44.7327	47.1994	2.46667	59.52	0.91	389.172	25.6	Onshore	Light & Medium
1184	Iran	2015	39.2091	45.8557	6.64656	99.8205	25.18	298.549	36	Shallow water	Light & Medium
1185	Iraq	2015	42.3541	44.6974	2.34329	61.3019	3.65	389.172	24	Onshore	Light & Medium
1186	Saudi Arabia	2015	46.4075	49.5445	3.13704	30.4598	212.75	7.2618	32	Onshore	Light & Medium
1187	Oman	2015	44.0422	51.087	7.04478	49.286	11.71	247.215	38	Onshore	Light & Medium
1188	United Arab Emirates	2015	42.5649	49.2215	6.65656	45.0212	20.98	168.507	33.42	Shallow water	Light & Medium
1189	Saudi Arabia	2015	50.1923	53.463	3.27073	30.9861	85.98	12.2125	54.5	Onshore	Light & Medium
1190	Iran	2015	47.2936	50.0437	2.75015	75.4688	44.9	286.773	37	Onshore	Light & Medium
1191	Saudi Arabia	2015	39.9362	46.3285	6.39226	27.1506	73	17.339	30	Shallow water	Light & Medium
1192	Yemen	2015	48.3893	50.7752	2.38584	108.648	0.09	1384.11	28	Onshore	Light & Medium
1193	Kuwait	2015	36.0915	42.6773	6.58581	110.807	9.86	27.8146	22	Onshore	Heavy
1194	Saudi Arabia	2015	36.0741	42.6773	6.60317	109.792	9.86	17.339	22	Onshore	Heavy
1195	Yemen	2015	47.4306	50.5609	3.13029	145.382	2.09	1384.11	31	Onshore	Light & Medium
1196	Syria	2015	40.2747	43.4396	3.16488	90.5315	1.42	723.621	30.5	Onshore	Light & Medium
1197	Iran	2015	45.8385	48.4151	2.57654	125.032	150.48	363.925	32	Onshore	Light & Medium
1198	Oman	2015	47.7325	50.3733	2.64075	50.8608	30.26	247.215	40.5	Onshore	Light & Medium
1199	Qatar	2015	42.7206	49.3793	6.65879	39.5416	21.99	115.304	37	Shallow water	Light & Medium
1200	United Arab Emirates	2015	43.3534	50.1174	6.76394	29.8551	7.79	23.7554	40	Shallow water	Light & Medium
1201	Oman	2015	47.3314	50.595	3.26365	49.6653	0.54	247.215	36	Onshore	Light & Medium
1202	Iraq	2015	42.9087	45.2721	2.3634	69.6411	5.48	389.172	42	Onshore	Light & Medium
1203	Iran	2015	46.7904	49.5769	2.78645	109.584	79.44	298.549	34.4	Onshore	Light & Medium
1204	Iran	2015	41.7032	44.488	2.78479	80.4057	56.81	298.549	29	Onshore	Light & Medium
1205	Oman	2015	47.9986	50.7519	2.75324	51.2805	0.35	247.215	46	Onshore	Light & Medium
1206	Iran	2015	46.6648	49.1088	2.44395	54.2297	19.9	298.549	35	Onshore	Light & Medium
1207	Mexico	2015	42.4255	48.6808	6.25531	42.1582	108.59	168.019	32	Shallow water	Light & Medium
1208	Mexico	2015	41.0968	44.7393	3.6425	65.4222	21.1	156.324	23	Onshore	Light & Medium
1209	Mexico	2015	48.0669	51.515	3.44805	57.4898	22.44	186.833	41	Onshore	Light & Medium
1210	Mexico	2015	42.2338	45.2212	2.98738	63.1077	15.29	186.833	30	Onshore	Light & Medium
1211	Mexico	2015	24.0679	43.7182	19.6503	38.4637	84.57	174.049	22	Shallow water	Heavy
1212	Canada	2015	30.6669	37.1317	6.46482	106.446	5.31	2	9	Onshore	Sands
1213	United States	2015	27.4979	49.8473	22.3494	38.3281	0.88	90.267	32.86	Deepwater	Light & Medium
1214	United States	2015	47.4074	51.3085	3.90109	44.2252	17.7	90.267	38	Onshore	Light & Medium
1215	United States	2015	33.4781	49.8818	16.4036	37.6266	1.52	90.267	33.36	Deepwater	Light & Medium
1216	United States	2015	37.9703	50.689	12.7187	38.9919	11.2	90.267	29	Ultra-deepwater	Light & Medium
1217	Mexico	2015	43.6737	48.6808	5.00709	51.6736	26.68	186.001	32	Onshore	Light & Medium
1218	United States	2015	37.8446	50.9494	13.1048	48.4845	12.68	90.267	36	Deepwater	Light & Medium
1219	United States	2015	46.7697	49.3973	2.6276	41.1311	110.11	90.267	26	Onshore	Light & Medium
1220	Mexico	2015	47.5785	51.1708	3.59233	49.9862	38.66	186.833	36	Onshore	Light & Medium
1221	Mexico	2015	26.4668	43.5093	17.0425	31.7865	314.28	102.874	18	Shallow water	Heavy
1222	United States	2015	29.8578	51.155	21.2972	39.5016	2.85	90.267	35.77	Deepwater	Light & Medium
1223	Mexico	2015	42.4958	45.4965	3.00069	64.1512	3.93	157.889	34	Onshore	Light & Medium
1224	United States	2015	41.7144	51.1101	9.3957	37.1356	11.42	90.267	31.9	Deepwater	Light & Medium
1225	Mexico	2015	47.4913	51.2397	3.74837	59.0326	9.04	186.833	37	Onshore	Light & Medium
1226	Mexico	2015	45.2079	48.8873	3.67948	56.7185	36.32	186.833	35	Onshore	Light & Medium
1227	Canada	2015	34.2871	40.4537	6.16657	77.9346	54.73	2	9	Onshore	Sands
1228	Canada	2015	31.5522	37.2349	5.68271	119.921	57.64	1.33621	10.5	Onshore	Sands
1229	United States	2015	49.9313	50.2311	0.299747	33.9558	1.8	90.267	32	Ultra-deepwater	Light & Medium
1230	United States	2015	35.2975	50.1454	14.8479	41.5433	0.34	90.267	37.19	Deepwater	Light & Medium
1231	United States	2015	29.7301	49.5472	19.8171	35.7771	0.62	90.267	28.5	Deepwater	Light & Medium
1232	United States	2015	33.4236	48.6958	15.2722	34.7312	1.07	90.267	29	Deepwater	Light & Medium
1233	United States	2015	51.5017	49.6297	0	74.2422	23.35	90.267	37.42	Ultra-deepwater	Light & Medium
1234	United States	2015	23.7889	47.5047	23.7158	61.794	0.8	90.267	31	Deepwater	Light & Medium
1235	United States	2015	32.7077	47.0617	14.354	33.6207	4.35	90.267	31	Deepwater	Light & Medium
1236	United States	2015	26.7454	49.6863	22.9408	35.1092	2.23	90.267	30.52	Deepwater	Light & Medium
1237	Canada	2015	45.0249	51.8083	6.78333	163.934	52.26	0	34	Onshore	Sands
1238	United States	2015	19.7096	50.1213	30.4117	43.6611	0.15	90.267	36.84	Deepwater	Light & Medium
1239	United States	2015	31.9399	50.689	18.7491	34.7444	3.68	90.267	29	Deepwater	Light & Medium
1240	Mexico	2015	43.7302	50.1323	6.40211	45.0665	95.42	186.833	37	Shallow water	Light & Medium
1241	United States	2015	36.6365	49.9809	13.3444	36.0292	4.23	90.267	34.8	Ultra-deepwater	Light & Medium
1242	Canada	2015	43.5289	50.3163	6.78737	242.042	14.22	2	7.5	Onshore	Sands
1243	United States	2015	23.6492	47.2293	23.5801	28.6633	12.04	90.267	27	Ultra-deepwater	Light & Medium
1244	United States	2015	32.9863	49.4894	16.5031	33.7815	0.75	90.267	29.59	Deepwater	Light & Medium
1245	United States	2015	29.5923	47.2982	17.7059	36.4	30.2	90.267	28	Deepwater	Light & Medium
1246	United States	2015	45.1924	48.5237	3.33127	46.6719	6.84	90.267	26.5	Onshore	Light & Medium
1247	United States	2015	73.9084	49.3648	0	35.4761	1.54	90.267	25.85	Deepwater	Light & Medium
1248	United States	2015	20.5849	48.4695	27.8846	36.5007	0.42	90.267	28.93	Deepwater	Light & Medium
1249	United States	2015	28.2106	49.7083	21.4977	35.5436	2.91	90.267	30.84	Deepwater	Light & Medium
1250	United States	2015	43.3128	48.7799	5.46711	38.2768	2.77	90.267	33.44	Deepwater	Light & Medium
1251	United States	2015	32.325	50.9643	18.6393	36.1748	4.46	90.267	33	Deepwater	Light & Medium
1252	Canada	2015	31.4726	37.1317	5.65912	119.267	36.65	2	9	Onshore	Sands
1253	United States	2015	81.2165	49.5816	0	35.4442	7.21	90.267	29	Ultra-deepwater	Light & Medium
1254	Canada	2015	44.8292	51.582	6.75279	129.241	68.22	2	32	Onshore	Sands
1255	Canada	2015	37.9744	44.883	6.90857	95.8547	10.19	2	9	Onshore	Sands
1256	Canada	2015	44.8825	51.737	6.85454	182.873	106.62	0	32	Onshore	Sands
1257	United States	2015	35.5409	49.4109	13.87	33.1075	1.42	90.267	26.52	Ultra-deepwater	Light & Medium
1258	Australia	2015	45.5662	52.3188	6.75264	43.319	0.4	285.797	38.2	Shallow water	Light & Medium
1259	Papua New Guinea	2015	49.2573	52.8381	3.58085	41.9127	6.32	135.701	45.1	Onshore	Light & Medium
1260	Australia	2015	42.3555	52.9291	10.5735	51.614	4.41	285.797	46.1	Onshore	Light & Medium
1261	Australia	2015	46.1103	52.7524	6.64207	35.0233	22.27	144.823	46.75	Shallow water	Light & Medium
1262	Australia	2015	26.913	53.8072	26.8942	45.0818	1.35	285.797	59.5	Deepwater	Light & Medium
1263	Australia	2015	45.5475	50.4435	4.89601	35.5766	11.49	183.801	19	Shallow water	Heavy
1264	Australia	2015	47.1196	50.8835	3.76384	42.2637	11.41	254.45	19.6	Deepwater	Heavy
1265	Australia	2015	45.9201	52.7073	6.78718	44.9615	0.62	285.797	43.2	Shallow water	Light & Medium
1266	Australia	2015	42.4748	51.7903	9.31551	51.8577	1.38	285.797	45	Onshore	Light & Medium
1267	Australia	2015	46.2607	53.0294	6.76862	43.6566	7.5	255.261	48.2	Shallow water	Light & Medium
1268	Papua New Guinea	2015	47.5698	51.943	4.37313	41.2655	3.13	135.701	44	Onshore	Light & Medium
1269	Russian Federation	2015	49.8963	52.2721	2.37578	62.5141	2.77	187.195	41.06	Onshore	Light & Medium
1270	Russian Federation	2015	48.8879	51.3549	2.46698	75.9883	6.34	183.132	28.7	Onshore	Light & Medium
1271	Azerbaijan	2015	45.4323	50.9263	5.49401	94.8191	1.04	21.6428	27.3	Onshore	Light & Medium
1272	Russian Federation	2015	45.3959	48.6428	3.2469	42.3283	85.99	100.266	33.7	Onshore	Light & Medium
1273	Russian Federation	2015	48.4047	51.097	2.69236	49.9866	8.47	181.821	27.85	Onshore	Light & Medium
1274	Kazakhstan	2015	46.3245	51.103	4.77851	52.1379	20.81	214.167	35.98	Onshore	Light & Medium
1275	Azerbaijan	2015	46.439	51.6877	5.24866	60.1741	0.25	22.2133	34.5	Onshore	Light & Medium
1276	Russian Federation	2015	42.3761	45.5303	3.15426	50.7403	74.93	187.195	28.7	Onshore	Light & Medium
1277	Georgia	2015	48.9122	51.2917	2.3795	126.811	0.18	374.128	31	Onshore	Light & Medium
1278	Kazakhstan	2015	44.9908	49.7825	4.79169	145.353	2.74	214.167	28.7	Onshore	Light & Medium
1279	Russian Federation	2015	50.3533	52.69	2.33664	78.3462	0.17	187.195	45.2	Onshore	Light & Medium
1280	Azerbaijan	2015	46.405	51.3384	4.93342	49.0735	0.68	22.2133	32	Onshore	Light & Medium
1281	Russian Federation	2015	42.1122	45.5303	3.4181	54.2738	58.74	187.195	28.7	Onshore	Light & Medium
1282	Russian Federation	2015	44.8343	47.9312	3.09682	53.3679	11.88	160.978	32.37	Onshore	Light & Medium
1283	Russian Federation	2015	44.2881	47.178	2.8898	50.5146	4.4	187.195	33.01	Onshore	Light & Medium
1284	Russian Federation	2015	38.9166	42.1893	3.27272	43.5289	105.24	125.406	31.64	Onshore	Light & Medium
1285	Russian Federation	2015	48.7534	51.3734	2.61996	52.4579	5.18	171.376	40.23	Onshore	Light & Medium
1286	Russian Federation	2015	42.0644	45.5743	3.50988	47.0588	49.11	158.097	25.8	Onshore	Light & Medium
1287	Kazakhstan	2015	45.3799	50.9254	5.54551	47.9909	2.79	214.167	26	Onshore	Light & Medium
1288	Russian Federation	2015	43.7459	46.5224	2.77658	54.3453	35.44	168.593	29.6	Onshore	Light & Medium
1289	Russian Federation	2015	48.9283	51.6062	2.67787	51.3232	6.98	183.605	35.89	Onshore	Light & Medium
1290	Russian Federation	2015	29.0254	40.486	11.4606	45.0587	6	181.077	20.73	Onshore	Heavy
1291	Russian Federation	2015	43.1771	46.6287	3.4516	43.6134	14.61	138.933	28.57	Onshore	Light & Medium
1292	Azerbaijan	2015	45.318	52.0836	6.7656	33.8724	0.5	22.2133	38	Shallow water	Light & Medium
1293	Russian Federation	2015	47.0117	52.1988	5.18714	53.0845	1.75	187.195	39.03	Onshore	Light & Medium
1294	Russian Federation	2015	48.9573	51.6717	2.71433	52.7239	6.18	179.178	38.45	Onshore	Light & Medium
1295	Russian Federation	2015	42.0259	46.3975	4.37158	49.9678	115.6	177.753	38.08	Onshore	Light & Medium
1296	Azerbaijan	2015	48.0366	50.5236	2.48705	42.244	0.02	22.2133	36.25	Onshore	Light & Medium
1297	Azerbaijan	2015	47.1588	51.4443	4.28559	38.1801	0.82	22.2133	30	Onshore	Light & Medium
1298	Russian Federation	2015	46.7432	49.6331	2.88988	49.5498	456.73	179.216	32	Onshore	Light & Medium
1299	Russian Federation	2015	32.9079	43.4255	10.5176	46.7224	3.65	187.195	20	Onshore	Heavy
1300	Russian Federation	2015	42.1344	45.9843	3.84993	41.0414	9.23	107.177	25	Onshore	Light & Medium
1301	Kazakhstan	2015	46.935	51.2935	4.35854	95.3308	38.9	196.635	41	Onshore	Light & Medium
1302	Russian Federation	2015	48.7403	51.4462	2.70589	58.8162	1.08	187.195	40	Onshore	Light & Medium
1303	Russian Federation	2015	46.8531	50.287	3.43391	44.2013	24.61	147.473	34.1	Onshore	Light & Medium
1304	Azerbaijan	2015	47.5905	51.0571	3.4666	35.0839	1.28	22.2133	44	Onshore	Light & Medium
1305	Kazakhstan	2015	44.0099	49.0528	5.04292	44.2824	3.46	163.663	25.5	Onshore	Light & Medium
1306	Russian Federation	2015	47.0663	50.1335	3.06721	51.4506	33.88	187.195	33.8	Onshore	Light & Medium
1307	Russian Federation	2015	39.5143	42.9635	3.4492	41.7097	8.1	136.16	22.94	Onshore	Light & Medium
1308	Russian Federation	2015	45.6669	50.0616	4.39471	42.1292	5.8	136.502	39.19	Onshore	Light & Medium
1309	Russian Federation	2015	41.4303	44.7209	3.29056	42.3083	46.95	125.539	27.88	Onshore	Light & Medium
1310	Russian Federation	2015	46.9397	49.8428	2.90307	47.3568	65.15	165.496	37.62	Onshore	Light & Medium
1311	Russian Federation	2015	47.3331	49.8717	2.53856	55.0964	148.23	65.7367	32.57	Onshore	Light & Medium
1312	Russian Federation	2015	46.4142	50.7375	4.32331	51.9741	11.36	187.195	40	Onshore	Light & Medium
1313	Russian Federation	2015	46.3901	49.8866	3.49649	45.4927	118.73	153.38	31.5	Onshore	Light & Medium
1314	Kazakhstan	2015	44.9269	49.7343	4.8074	49.9904	44.71	191.925	28	Onshore	Light & Medium
1315	Russian Federation	2015	45.4723	49.7038	4.23149	44.2303	104.81	187.195	35.6	Onshore	Light & Medium
1316	Russian Federation	2015	44.9054	47.8792	2.97373	52.5599	44.13	187.195	41.91	Onshore	Light & Medium
1317	Russian Federation	2015	45.3108	48.4417	3.13094	43.7554	72.26	141.625	36.57	Onshore	Light & Medium
1318	Russian Federation	2015	46.4613	49.9658	3.50449	43.906	104.05	145.574	38.12	Onshore	Light & Medium
1319	Russian Federation	2015	42.9095	47.0321	4.12256	45.568	1.31	137.227	32.5	Onshore	Light & Medium
1320	Russian Federation	2015	47.0706	50.1927	3.12205	50.7458	263.51	187.195	36.59	Onshore	Light & Medium
1321	Russian Federation	2015	47.6055	50.7443	3.13885	79.4224	53.15	136.299	34.63	Onshore	Light & Medium
1322	Kazakhstan	2015	47.1415	51.7694	4.62783	47.9536	40.52	214.167	34.4	Onshore	Light & Medium
1323	Russian Federation	2015	48.0953	51.8798	3.78453	46.3145	3.03	151.492	38.9	Onshore	Light & Medium
1324	Kazakhstan	2015	46.3116	51.8043	5.49262	50.7822	1.23	214.167	33.62	Onshore	Light & Medium
1325	Russian Federation	2015	45.9714	51.4729	5.50151	50.0733	2.18	187.195	38.78	Onshore	Light & Medium
1326	Kazakhstan	2015	46.7227	50.7135	3.9908	47.8799	1.8	214.167	30	Onshore	Light & Medium
1327	Russian Federation	2015	44.3012	47.4064	3.10519	53.4996	20.5	169.966	40.19	Onshore	Light & Medium
1328	Russian Federation	2015	45.1757	50.0312	4.85551	39.183	44.79	115.231	33.6	Onshore	Light & Medium
1329	Turkmenistan	2015	48.0009	51.7221	3.7212	87.4984	5.45	683.658	35	Onshore	Light & Medium
1330	Russian Federation	2015	49.0027	51.9411	2.93849	52.3405	12.05	187.195	34	Onshore	Light & Medium
1331	Russian Federation	2015	47.6984	51.8396	4.14122	39.9781	5.85	122.487	38.96	Onshore	Light & Medium
1332	Russian Federation	2015	30.3933	43.5964	13.203	40.455	4.73	138.288	20.23	Onshore	Heavy
1333	Russian Federation	2015	48.6225	51.4468	2.8243	56.0988	33.28	187.195	36.47	Onshore	Light & Medium
1334	Turkmenistan	2015	44.5892	51.2718	6.68259	91.097	33.47	683.658	34.25	Shallow water	Light & Medium
1335	Russian Federation	2015	45.9316	49.3031	3.37149	51.9573	7.31	187.195	41.04	Onshore	Light & Medium
1336	Russian Federation	2015	48.2714	51.1708	2.89947	53.9403	104.12	187.195	36	Onshore	Light & Medium
1337	Russian Federation	2015	41.6903	45.4669	3.77655	46.0634	6.7	187.195	28.1	Onshore	Light & Medium
1338	Russian Federation	2015	47.3404	51.2735	3.93307	51.3836	0.67	187.195	31.7	Onshore	Light & Medium
1339	Russian Federation	2015	41.7866	46.0574	4.27083	51.3437	3.08	187.195	27.67	Onshore	Light & Medium
1340	Russian Federation	2015	46.7353	51.7116	4.97629	49.4849	40.88	171.017	44.5	Onshore	Light & Medium
1341	Russian Federation	2015	39.4588	44.3406	4.88177	40.3166	20.49	128.674	25.25	Onshore	Light & Medium
1342	Russian Federation	2015	45.0926	47.8414	2.74888	54.4513	6.72	187.195	31.71	Onshore	Light & Medium
1343	Russian Federation	2015	44.5862	48.3384	3.75222	48.2798	18.86	187.195	33.46	Onshore	Light & Medium
1344	Russian Federation	2015	44.5705	49.6307	5.06027	44.4201	80.29	176.457	31	Onshore	Light & Medium
1345	Russian Federation	2015	48.4958	51.9752	3.47944	41.6456	2.85	145.344	44.79	Onshore	Light & Medium
1346	Russian Federation	2015	48.1809	51.4239	3.243	41.4814	16.78	129.281	38.39	Onshore	Light & Medium
1347	Russian Federation	2015	48.7711	51.7348	2.96372	45.2959	2.07	149.39	41.62	Onshore	Light & Medium
1348	Russian Federation	2015	48.863	51.515	2.65202	56.6394	15.38	187.195	41	Onshore	Light & Medium
1349	Russian Federation	2015	47.165	51.1395	3.97456	51.5941	0.75	187.195	34.58	Onshore	Light & Medium
1350	Russian Federation	2015	48.5938	51.5525	2.95873	51.2474	2.98	187.195	40.58	Onshore	Light & Medium
1351	Russian Federation	2015	41.3662	46.6475	5.28135	41.4731	3.57	125.16	39.46	Onshore	Light & Medium
1352	Russian Federation	2015	49.1103	51.96	2.84964	38.5314	1.5	128.779	41.03	Onshore	Light & Medium
1353	Russian Federation	2015	49.4076	52.2788	2.8711	50.6912	0.74	187.195	41.8	Onshore	Light & Medium
1354	Russian Federation	2015	44.7619	48.6347	3.87272	50.7364	12.81	187.195	35.19	Onshore	Light & Medium
1355	Russian Federation	2015	44.886	47.4372	2.5512	49.2204	0.07	187.195	31.95	Onshore	Light & Medium
1356	Russian Federation	2015	46.3571	49.4401	3.08299	45.2869	4.85	181.167	35.63	Onshore	Light & Medium
1357	Russian Federation	2015	48.7934	51.4834	2.69002	52.2183	8.92	187.195	34.75	Onshore	Light & Medium
1358	Russian Federation	2015	49.1935	52.1035	2.91001	46.9517	8.17	187.195	42.15	Onshore	Light & Medium
1359	Russian Federation	2015	42.4869	45.015	2.52816	79.4359	0.47	187.195	44.7	Onshore	Light & Medium
1360	Russian Federation	2015	46.8232	50.5777	3.75445	45.1446	20.45	187.195	38	Onshore	Light & Medium
1361	Russian Federation	2015	44.9735	51.4693	6.49581	42.5764	60.96	139.349	31.65	Shallow water	Light & Medium
1362	Russian Federation	2015	44.8788	48.9124	4.03358	45.8413	1.76	158.882	28.93	Onshore	Light & Medium
1363	Russian Federation	2015	48.8303	51.8107	2.98038	47.9339	6.19	167.143	35	Onshore	Light & Medium
1364	Russian Federation	2015	44.1749	48.5581	4.38318	47.2999	1.57	187.195	30.86	Onshore	Light & Medium
1365	Russian Federation	2015	51.2864	53.6399	2.35347	62.9027	1.35	187.195	59	Onshore	Light & Medium
1366	Kazakhstan	2015	44.0411	49.2734	5.23227	48.2414	6.69	214.167	39	Onshore	Light & Medium
1367	Russian Federation	2015	48.9614	51.9531	2.99175	35.1292	2.16	80.5812	39	Onshore	Light & Medium
1368	Kazakhstan	2015	48.1811	52.0268	3.84563	50.8353	6.69	214.167	42	Onshore	Light & Medium
1369	Kazakhstan	2015	46.6473	51.0302	4.38292	44.2467	14.32	142.765	42	Onshore	Light & Medium
1370	Russian Federation	2015	42.8346	46.7511	3.9165	37.3432	23.66	107.787	25.2	Onshore	Light & Medium
1371	Russian Federation	2015	45.6105	49.0495	3.43901	51.605	2.31	187.195	38	Onshore	Light & Medium
1372	Russian Federation	2015	46.6169	49.9824	3.36552	38.1191	2.35	124.09	30.64	Onshore	Light & Medium
1373	Russian Federation	2015	45.5312	50.2836	4.75237	51.281	13.51	187.195	37.91	Onshore	Light & Medium
1374	Kazakhstan	2015	47.4392	51.4263	3.98708	38.3708	231.73	43.7901	43.25	Onshore	Light & Medium
1375	Russian Federation	2015	45.0375	51.6227	6.58527	54.0735	38.9	187.195	34.2	Shallow water	Light & Medium
1376	Russian Federation	2015	46.5553	51.0185	4.46323	51.1631	5.49	187.195	39.9	Onshore	Light & Medium
1377	Russian Federation	2015	46.5756	50.7428	4.1672	39.462	1.31	140.775	33	Onshore	Light & Medium
1378	Russian Federation	2015	45.842	50.2534	4.41143	39.851	3.77	139.462	37.15	Onshore	Light & Medium
1379	Kazakhstan	2015	46.3029	51.8424	5.53953	49.1107	24.24	213.59	39	Onshore	Light & Medium
1380	Russian Federation	2015	45.6393	48.7909	3.15169	35.4446	10.22	100.561	26.2	Onshore	Light & Medium
1381	Russian Federation	2015	48.8705	52.3155	3.44501	41.1948	1.08	151.034	41.69	Onshore	Light & Medium
1382	Russian Federation	2015	48.4414	51.3052	2.86378	29.2959	1.32	12.0159	35.7	Onshore	Light & Medium
1383	Russian Federation	2015	46.2782	50.3337	4.05549	50.0118	0.82	187.195	35.1	Onshore	Light & Medium
1384	Uzbekistan	2015	51.0798	53.554	2.4742	168.982	1.06	1679.78	57.43	Onshore	Light & Medium
1385	Russian Federation	2015	47.9631	51.7293	3.7662	38.7069	27.49	123.655	38	Onshore	Light & Medium
1386	Uzbekistan	2015	47.9416	50.586	2.64438	120.629	1.22	1679.78	32.33	Onshore	Light & Medium
1387	Russian Federation	2015	46.5423	51.41	4.86766	49.9877	62.56	187.195	34.97	Onshore	Light & Medium
1388	Kazakhstan	2015	45.167	52.0884	6.92137	43.8833	7.4	201.32	40	Onshore	Light & Medium
1389	Kazakhstan	2015	46.4619	51.8203	5.35836	52.5945	3.53	214.167	39	Onshore	Light & Medium
1390	Russian Federation	2015	48.3706	52.008	3.63741	48.198	0.77	171.833	47.84	Onshore	Light & Medium
1391	Russian Federation	2015	46.7239	51.7298	5.00586	54.1294	158.93	187.195	32.86	Onshore	Light & Medium
1392	Kazakhstan	2015	47.1447	51.8891	4.74436	49.5106	1.98	214.167	40	Onshore	Light & Medium
1393	Kazakhstan	2015	49.9178	53.0377	3.11991	52.245	1.24	214.167	48	Onshore	Light & Medium
1394	Russian Federation	2015	43.7569	49.6379	5.88098	54.0384	2.61	187.195	34	Onshore	Light & Medium
1395	Russian Federation	2015	48.0643	51.3085	3.24419	48.5972	4.31	187.195	38	Onshore	Light & Medium
1396	Nigeria	2015	30.2694	51.5928	21.3234	61.3063	33.47	125.052	32.8	Deepwater	Light & Medium
1397	United Kingdom	2015	44.4132	51.1636	6.7504	45.7219	1.08	179.614	33	Shallow water	Light & Medium
1398	United Kingdom	2015	44.8241	51.6628	6.83875	62.0404	1.58	418.898	38	Shallow water	Light & Medium
1399	Denmark	2015	45.0888	51.9729	6.88406	26.3054	1.74	64.9926	38	Shallow water	Light & Medium
1400	Brazil	2015	44.4796	49.8722	5.39264	40.2492	69.54	50.8468	18.1	Deepwater	Heavy
1401	Iraq	2015	40.4431	46.4273	5.98413	37.7502	49.23	85.21	25	Onshore	Light & Medium
1402	Nigeria	2015	40.8076	51.4054	10.5979	29.4149	70.08	31.3539	30.4	Deepwater	Light & Medium
1403	Nigeria	2015	45.3537	52.101	6.74732	133.109	0.13	1081	36	Shallow water	Light & Medium
1404	South Sudan	2015	46.4916	51.2865	4.79487	73.0147	57.85	501.968	26.42	Onshore	Light & Medium
1405	Congo	2015	44.6608	51.6437	6.98291	55.0755	2.14	410.266	30	Shallow water	Light & Medium
1406	Congo	2015	44.3028	51.2696	6.96679	55.4179	2.11	410.266	31	Shallow water	Light & Medium
1407	Congo	2015	44.9217	51.6963	6.77466	55.595	0.55	410.266	37.2	Shallow water	Light & Medium
1408	Congo	2015	44.2247	51.1319	6.90723	54.0873	6.78	410.266	29	Shallow water	Light & Medium
1409	Congo	2015	45.46	52.3174	6.85739	55.1771	1.39	410.266	38.5	Shallow water	Light & Medium
1410	Congo	2015	40.448	47.2293	6.78131	57.2128	4.32	410.266	27	Shallow water	Light & Medium
1411	Congo	2015	46.0656	52.8489	6.78333	51.7352	0.92	410.266	45.9	Shallow water	Light & Medium
1412	Congo	2015	44.3637	51.1319	6.76818	56.3991	4.82	410.266	29	Shallow water	Light & Medium
1413	Congo	2015	37.5224	44.3027	6.7803	56.3534	4.64	410.266	24.7	Shallow water	Light & Medium
1414	Libya	2015	49.6698	52.0004	2.33059	83.9598	0.36	585.106	38.4	Onshore	Light & Medium
1415	Nigeria	2015	43.2639	50.0635	6.79961	53.7403	0.28	315.006	36	Shallow water	Light & Medium
1416	Tunisia	2015	49.1765	52.9491	3.77266	92.657	0.44	766.493	48	Onshore	Light & Medium
1417	Nigeria	2015	45.3263	52.1132	6.78689	92.5123	14.02	73.8391	36.5	Shallow water	Light & Medium
1418	United Kingdom	2015	45.2029	51.943	6.74002	21.9581	4.11	0	44	Shallow water	Light & Medium
1419	United Kingdom	2015	45.2743	52.0268	6.75245	35.4737	0.21	132.431	42	Shallow water	Light & Medium
1420	Brazil	2015	30.6568	50.7737	20.1169	26.8122	18.15	50.8468	28.3	Deepwater	Light & Medium
1421	Norway	2015	44.7593	51.5497	6.79038	26.4135	2.43	16.6896	37	Shallow water	Light & Medium
1422	United Arab Emirates	2015	43.8688	49.453	5.58416	24.8723	237.74	23.7554	40	Shallow water	Light & Medium
1423	Canada	2015	37.0558	43.7068	6.651	47.1666	10.74	34.7342	8	Onshore	Sands
1424	Canada	2015	38.3492	43.7068	5.35763	94.7846	31.59	2	8	Onshore	Sands
1425	Gabon	2015	41.9139	48.709	6.79505	77.2374	1.2	648.093	35	Shallow water	Light & Medium
1426	Gabon	2015	41.8439	48.709	6.86514	75.3519	0.22	648.093	31	Shallow water	Light & Medium
1427	Egypt	2015	41.7693	48.709	6.93969	58.7801	0.48	378.303	30	Onshore	Light & Medium
1428	Tunisia	2015	43.2373	48.709	5.47175	88.4277	0.33	766.493	41.5	Onshore	Light & Medium
1429	Thailand	2015	41.7682	48.709	6.94081	28.2251	4.16	86.5335	27	Shallow water	Light & Medium
1430	China	2015	36.8532	48.709	11.8558	27.6499	2.23	46.593	17	Shallow water	Heavy
1431	India	2015	43.8597	48.709	4.84929	51.9308	0.66	243.064	27	Onshore	Light & Medium
1432	China	2015	44.3035	48.709	4.4055	37.4931	0.59	46.593	31	Onshore	Light & Medium
1433	China	2015	44.2856	48.709	4.42337	25.9971	5.29	46.593	16	Shallow water	Heavy
1434	China	2015	41.9399	48.709	6.76912	27.2453	4.02	46.593	34	Shallow water	Light & Medium
1435	China	2015	11.7555	48.709	36.9535	127.177	2.66	46.593	20	Onshore	Heavy
1436	United States	2015	38.2577	48.709	10.4513	36.3931	0.57	90.267	28.0793	Onshore	Shale & Tight Oil
1437	United States	2015	39.8063	48.709	8.90268	36.2398	15.2	90.267	28.0793	Onshore	Shale & Tight Oil
1438	Canada	2015	25.1885	48.709	23.5205	34.0924	7.43	40.0243	11	Onshore	Heavy
1439	United States	2015	38.9317	48.709	9.77734	35.4135	1.32	90.267	28.0793	Onshore	Shale & Tight Oil
1440	United States	2015	34.1307	48.709	14.5783	35.5367	2.25	90.267	28.0793	Onshore	Shale & Tight Oil
1441	United States	2015	36.4692	48.709	12.2398	36.24	3.38	90.267	28.0793	Onshore	Shale & Tight Oil
1442	United States	2015	38.6202	48.709	10.0888	35.8072	9.81	90.267	28.0793	Onshore	Shale & Tight Oil
1443	United States	2015	33.8255	48.709	14.8835	35.4126	0.71	90.267	28.0793	Onshore	Shale & Tight Oil
1444	United States	2015	35.7358	48.709	12.9732	35.6717	5.65	90.267	28.0793	Onshore	Shale & Tight Oil
1445	United States	2015	34.0539	48.709	14.6551	36.2407	4.21	90.267	28.0793	Onshore	Shale & Tight Oil
1446	United States	2015	33.5839	48.709	15.1251	35.2659	0.09	90.267	28.0793	Onshore	Shale & Tight Oil
1447	United States	2015	33.0127	48.709	15.6963	35.4023	0.43	90.267	28.0793	Onshore	Shale & Tight Oil
1448	United States	2015	32.6583	48.709	16.0507	35.273	0.22	90.267	28.0793	Onshore	Shale & Tight Oil
1449	United States	2015	33.1131	48.709	15.5959	35.6727	0.66	90.267	28.0793	Onshore	Shale & Tight Oil
1450	United States	2015	34.9058	48.709	13.8032	36.2431	1.38	90.267	28.0793	Onshore	Shale & Tight Oil
1451	United States	2015	37.0357	48.709	11.6733	35.8088	4.35	90.267	28.0793	Onshore	Shale & Tight Oil
1452	United States	2015	36.406	48.709	12.303	35.6709	6.96	90.267	28.0793	Onshore	Shale & Tight Oil
1453	United States	2015	32.9491	48.709	15.7599	35.6796	0.45	90.267	28.0793	Onshore	Shale & Tight Oil
1454	United States	2015	38.668	48.709	10.041	36.5717	0.13	90.267	28.0793	Onshore	Shale & Tight Oil
1455	United States	2015	34.2839	48.709	14.4251	35.9459	2.35	90.267	28.0793	Onshore	Shale & Tight Oil
1456	United States	2015	33.1788	48.709	15.5302	35.2794	0.77	90.267	28.0793	Onshore	Shale & Tight Oil
1457	United States	2015	38.9697	48.709	9.73929	36.2411	4.96	90.267	28.0793	Onshore	Shale & Tight Oil
1458	United States	2015	42.0247	48.709	6.68426	35.6707	2.85	90.267	28.0793	Onshore	Shale & Tight Oil
1459	United States	2015	36.284	48.709	12.425	35.2839	2.11	90.267	28.0793	Onshore	Shale & Tight Oil
1460	United States	2015	35.4136	48.709	13.2954	35.5371	4.65	90.267	28.0793	Onshore	Shale & Tight Oil
1461	United States	2015	34.9546	48.709	13.7544	35.2902	0.76	90.267	28.0793	Onshore	Shale & Tight Oil
1462	United States	2015	33.2948	48.709	15.4142	35.6768	0.37	90.267	28.0793	Onshore	Shale & Tight Oil
1463	United States	2015	33.9601	48.709	14.7489	35.683	0.11	90.267	28.0793	Onshore	Shale & Tight Oil
1464	United States	2015	33.5222	48.709	15.1868	35.9489	1.94	90.267	28.0793	Onshore	Shale & Tight Oil
1465	United States	2015	34.1409	48.709	14.5681	35.537	3.62	90.267	28.0793	Onshore	Shale & Tight Oil
1466	United States	2015	35.2267	48.709	13.4823	36.2407	3.99	90.267	28.0793	Onshore	Shale & Tight Oil
1467	United States	2015	37.0229	48.709	11.6861	35.8079	6.27	90.267	28.0793	Onshore	Shale & Tight Oil
1468	United States	2015	33.0796	48.709	15.6294	35.4023	0.46	90.267	28.0793	Onshore	Shale & Tight Oil
1469	United States	2015	36.7017	48.709	12.0073	35.6723	3.2	90.267	28.0793	Onshore	Shale & Tight Oil
1470	United States	2015	33.2038	48.709	15.5052	36.2417	1.98	90.267	28.0793	Onshore	Shale & Tight Oil
1471	United States	2015	32.5985	48.709	16.1105	35.414	0.27	90.267	28.0793	Onshore	Shale & Tight Oil
1472	United States	2015	33.8771	48.709	14.8319	35.6726	2.55	90.267	28.0793	Onshore	Shale & Tight Oil
1473	United States	2015	34.1181	48.709	14.5909	35.5392	2.92	90.267	28.0793	Onshore	Shale & Tight Oil
1474	United States	2015	32.9787	48.709	15.7303	35.8473	0.52	90.267	28.0793	Onshore	Shale & Tight Oil
1475	Canada	2015	36.2531	48.709	12.4559	36.6691	2.89	40.0243	28.0793	Onshore	Shale & Tight Oil
1476	Canada	2015	36.7346	48.709	11.9744	37.1844	0.36	40.0243	28.0793	Onshore	Shale & Tight Oil
1477	Canada	2015	34.262	48.709	14.447	35.4527	0.74	40.0243	36	Onshore	Other Oil
1478	United States	2015	46.8265	48.709	1.88254	35.2769	0.11	90.267	28.0793	Onshore	Shale & Tight Oil
1479	United States	2015	34.9533	48.709	13.7557	35.5388	1.43	90.267	28.0793	Onshore	Shale & Tight Oil
1480	United States	2015	57.5053	48.709	0	35.4826	1.49	90.267	28.0793	Onshore	Shale & Tight Oil
1481	United States	2015	34.4049	48.709	14.3041	35.2789	0.96	90.267	28.0793	Onshore	Shale & Tight Oil
1482	United States	2015	37.5981	48.709	11.1109	35.4073	4.2	90.267	28.0793	Onshore	Shale & Tight Oil
1483	United States	2015	32.8151	48.709	15.8939	35.2925	0.17	90.267	28.0793	Onshore	Shale & Tight Oil
1484	United States	2015	36.7343	48.709	11.9747	35.6702	5.69	90.267	28.0793	Onshore	Shale & Tight Oil
1485	United States	2015	33.0859	48.709	15.6231	35.4213	0.49	90.267	28.0793	Onshore	Shale & Tight Oil
1486	United States	2015	34.2955	48.709	14.4135	35.5421	0.76	90.267	28.0793	Onshore	Shale & Tight Oil
1487	Canada	2015	44.9821	48.709	3.72693	35.7245	0.34	40.0243	29.4	Onshore	Light & Medium
1488	United States	2015	42.4354	48.709	6.2736	37.0439	3.23	90.267	36.4882	Onshore	Other Oil
1489	United States	2015	40.6211	48.709	8.0879	37.0588	0.11	90.267	36.4882	Onshore	Other Oil
1490	United States	2015	48.675	48.709	0.0339594	37.0438	5.48	90.267	36.4882	Onshore	Other Oil
1491	United States	2015	35.8361	48.709	12.8729	37.0428	1.14	90.267	36.4882	Onshore	Other Oil
1492	United States	2015	40.9025	48.709	7.80649	37.0468	0.91	90.267	36.4882	Onshore	Other Oil
1493	United States	2015	40.8707	48.709	7.83831	37.0433	4.23	90.267	36.4882	Onshore	Other Oil
1494	United States	2015	41.2317	48.709	7.47725	37.0448	1.86	90.267	36.4882	Onshore	Other Oil
1495	United States	2015	42.77	48.709	5.939	37.0446	2.51	90.267	36.4882	Onshore	Other Oil
1496	United States	2015	41.7557	48.709	6.95328	37.0438	7.53	90.267	36.4882	Onshore	Other Oil
1497	United States	2015	38.6297	48.709	10.0793	37.0433	9.65	90.267	36.4882	Onshore	Other Oil
1498	United States	2015	47.8368	48.709	0.872224	35.8071	1.71	90.267	36.4882	Onshore	Other Oil
1499	United States	2015	42.6973	48.709	6.01166	36.549	11.03	90.267	36.4882	Onshore	Other Oil
1500	United States	2015	38.8313	48.709	9.87772	37.0438	3.65	90.267	36.4882	Onshore	Other Oil
1501	United States	2015	43.0382	48.709	5.6708	37.0432	2.92	90.267	36.4882	Onshore	Other Oil
1502	United States	2015	35.0005	48.709	13.7085	37.147	0.05	90.267	36.4882	Onshore	Other Oil
1503	United States	2015	47.7471	48.709	0.961913	35.5576	0.33	90.267	36.4882	Onshore	Other Oil
1504	United States	2015	39.5724	48.709	9.13662	37.0539	0.33	90.267	36.4882	Onshore	Other Oil
1505	United States	2015	50.609	48.709	0	35.7194	0.1	90.267	36.4882	Onshore	Other Oil
1506	United States	2015	49.3335	48.709	0	35.808	2.33	90.267	36.4882	Onshore	Other Oil
1507	United States	2015	42.1827	48.709	6.52634	37.0433	11.9	90.267	36.4882	Onshore	Other Oil
1508	United States	2015	40.5196	48.709	8.18939	36.5512	0.51	90.267	36.4882	Onshore	Other Oil
1509	United States	2015	41.8628	48.709	6.84617	36.9868	2.19	90.267	36.4882	Onshore	Other Oil
1510	United States	2015	41.6315	48.709	7.07746	35.5376	3.33	90.267	36.4882	Onshore	Other Oil
1511	United States	2015	42.5208	48.709	6.18817	37.0437	4.27	90.267	36.4882	Onshore	Other Oil
1512	United States	2015	45.6364	48.709	3.07261	35.8078	4.66	90.267	36.4882	Onshore	Other Oil
1513	United States	2015	41.4395	48.709	7.26955	36.0932	3.56	90.267	36.4882	Onshore	Other Oil
1514	United States	2015	43.4095	48.709	5.2995	35.6699	3.76	90.267	36.4882	Onshore	Other Oil
1515	United States	2015	44.0867	48.709	4.62225	37.0434	19.88	90.267	36.4882	Onshore	Other Oil
1516	United States	2015	42.417	48.709	6.292	35.6723	0.26	90.267	36.4882	Onshore	Other Oil
1517	United States	2015	41.3876	48.709	7.32138	37.0447	0.6	90.267	36.4882	Onshore	Other Oil
1518	United States	2015	41.9616	48.709	6.74743	37.05	0.5	90.267	36.4882	Onshore	Other Oil
1519	United States	2015	37.7965	48.709	10.9125	37.0441	1.02	90.267	36.4882	Onshore	Other Oil
1520	United States	2015	49.831	48.709	0	35.6689	1.5	90.267	36.4882	Onshore	Other Oil
1521	United States	2015	39.474	48.709	9.23503	35.5384	3.74	90.267	36.4882	Onshore	Other Oil
1522	United States	2015	40.8294	48.709	7.87956	35.538	5.56	90.267	36.4882	Onshore	Other Oil
1523	United States	2015	44.4301	48.709	4.27888	36.7099	3.93	90.267	36.4882	Onshore	Other Oil
1524	United States	2015	55.3193	48.709	0	45.6961	0.64	90.267	36.4882	Onshore	Other Oil
1525	United States	2015	39.5513	48.709	9.15768	37.045	0.82	90.267	36.4882	Onshore	Other Oil
1526	United States	2015	43.7402	48.709	4.9688	44.559	2.2	90.267	36.4882	Onshore	Other Oil
1527	United States	2015	51.0062	48.709	0	37.0435	6.2	90.267	36.4882	Onshore	Other Oil
1528	United States	2015	48.2225	48.709	0.486468	35.8076	8	90.267	36.4882	Onshore	Other Oil
1529	United States	2015	34.4766	48.709	14.2324	37.108	0.05	90.267	36.4882	Onshore	Other Oil
1530	United States	2015	37.9277	48.709	10.7813	37.0463	0.99	90.267	36.4882	Onshore	Other Oil
1531	Canada	2015	44.7208	48.709	3.98819	38.266	2.92	40.0243	35.5	Onshore	Light & Medium
1532	Canada	2015	37.7691	48.709	10.9399	35.3414	0.62	40.0243	28.0793	Onshore	Shale & Tight Oil
1533	Canada	2015	34.4765	48.709	14.2325	35.6698	0.87	40.0243	36.4882	Onshore	Other Oil
1534	United States	2015	41.1027	48.709	7.60634	37.0436	1.92	90.267	36.4882	Onshore	Other Oil
1535	United States	2015	45.338	48.709	3.37103	45.6634	2.82	90.267	36.4882	Onshore	Other Oil
1536	United States	2015	39.1702	48.709	9.53875	36.5526	0.37	90.267	36.4882	Onshore	Other Oil
1537	United States	2015	39.5348	48.709	9.17418	36.9868	2.19	90.267	36.4882	Onshore	Other Oil
1538	United States	2015	42.5021	48.709	6.20685	45.8348	2.09	90.267	36.4882	Onshore	Other Oil
1539	United States	2015	44.4252	48.709	4.28379	35.8072	3.91	90.267	36.4882	Onshore	Other Oil
1540	United States	2015	38.1174	48.709	10.5916	45.5199	12.04	90.267	36.4882	Onshore	Other Oil
1541	United States	2015	34.9468	48.709	13.7622	34.2148	0.21	90.267	28.63	Deepwater	Light & Medium
1542	Canada	2015	34.3483	48.709	14.3607	32.0275	0.04	40.0243	18	Onshore	Heavy
1543	United States	2015	35.3118	48.709	13.3972	35.4116	1.11	90.267	28.0793	Onshore	Shale & Tight Oil
1544	Canada	2015	42.4966	48.709	6.21242	82.0777	3.79	2	11	Onshore	Sands
1545	Canada	2015	39.8236	48.709	8.88535	35.5598	1.63	40.0243	36.4882	Onshore	Other Oil
1546	United States	2015	55.8321	48.709	0	32.2352	1.03	90.267	37.9	Deepwater	Light & Medium
1547	United States	2015	46.9816	48.709	1.72741	35.6721	2.04	90.267	28.0793	Onshore	Shale & Tight Oil
1548	United States	2015	45.1239	48.709	3.5851	34.7618	3.08	90.267	25	Deepwater	Light & Medium
1549	United States	2015	43.5096	48.709	5.19938	35.5389	3.67	90.267	28.0793	Onshore	Shale & Tight Oil
1550	United States	2015	34.6679	48.709	14.0411	35.5358	0.58	90.267	28.0793	Onshore	Shale & Tight Oil
1551	Canada	2015	42.1399	48.709	6.56912	39.3193	0.01	40.0243	36.4882	Onshore	Other Oil
1552	Canada	2015	40.9714	48.709	7.73761	42.6447	55.87	40.0243	36.4882	Onshore	Other Oil
1553	Canada	2015	34.1445	48.709	14.5645	35.6698	0.3	40.0243	36.4882	Onshore	Other Oil
1554	Canada	2015	34.8355	48.709	13.8735	37.4793	0.06	40.0243	36.4882	Onshore	Other Oil
1555	Canada	2015	35.3071	48.709	13.4019	35.2471	1.89	40.0243	36.4882	Onshore	Other Oil
1556	Canada	2015	46.1407	48.709	2.56832	37.1096	0.11	40.0243	26.05	Onshore	Light & Medium
1557	United States	2015	44.3016	48.709	4.4074	37.044	5.29	90.267	36.4882	Onshore	Other Oil
1558	United States	2015	40.3076	48.709	8.40141	36.9855	3.75	90.267	36.4882	Onshore	Other Oil
1559	United States	2015	41.6787	48.709	7.03027	36.556	0.5	90.267	36.4882	Onshore	Other Oil
1560	United States	2015	38.3371	48.709	10.3719	37.0477	1.17	90.267	36.4882	Onshore	Other Oil
1561	United States	2015	39.5306	48.709	9.1784	37.041	0.87	90.267	36.4882	Onshore	Other Oil
1562	United States	2015	46.2882	48.709	2.42082	35.9498	1.41	90.267	36.4882	Onshore	Other Oil
1563	United States	2015	39.0014	48.709	9.70762	37.0439	3.76	90.267	36.4882	Onshore	Other Oil
1564	United States	2015	45.9185	48.709	2.79054	37.0475	3.65	90.267	36.4882	Onshore	Other Oil
1565	United States	2015	39.1481	48.709	9.56087	45.5102	25.92	90.267	36.4882	Onshore	Other Oil
1566	United States	2015	50.3432	48.709	0	37.0443	2.97	90.267	36.4882	Onshore	Other Oil
1567	United States	2015	37.9157	48.709	10.7933	37.0436	2.15	90.267	36.4882	Onshore	Other Oil
1568	United States	2015	41.1643	48.709	7.54474	37.0464	0.82	90.267	36.4882	Onshore	Other Oil
1569	United States	2015	48.6417	48.709	0.0673313	35.808	4.6	90.267	36.4882	Onshore	Other Oil
1570	United States	2015	38.5461	48.709	10.1629	45.5196	13.26	90.267	36.4882	Onshore	Other Oil
1571	Canada	2015	36.5447	48.709	12.1643	34.3491	12.97	40.0243	37.94	Onshore	Other Oil
1572	Canada	2015	34.3404	48.709	14.3686	116.56	1.78	40.0243	44.4	Onshore	Other Oil
1573	Canada	2015	42.8414	48.709	5.86764	31.9045	2.35	40.0243	27.5	Onshore	Light & Medium
1574	United States	2015	33.4529	48.709	15.2561	35.5378	0.73	90.267	28.0793	Onshore	Shale & Tight Oil
1575	United States	2015	34.8843	48.709	13.8247	36.0934	4.07	90.267	28.0793	Onshore	Shale & Tight Oil
1576	United States	2015	34.5418	48.709	14.1672	35.8093	2.14	90.267	28.0793	Onshore	Shale & Tight Oil
1577	United States	2015	36.2317	48.709	12.4773	35.9489	3.37	90.267	28.0793	Onshore	Shale & Tight Oil
1578	United States	2015	36.5239	48.709	12.1851	35.9483	2.26	90.267	28.0793	Onshore	Shale & Tight Oil
1579	United States	2015	36.1378	48.709	12.5712	35.9484	2.09	90.267	28.0793	Onshore	Shale & Tight Oil
1580	United States	2015	54.9145	48.709	0	35.4815	1.88	90.267	28.0793	Onshore	Shale & Tight Oil
1581	United States	2015	35.6637	48.709	13.0453	35.5383	3.53	90.267	28.0793	Onshore	Shale & Tight Oil
1582	United States	2015	38.7836	48.709	9.92538	36.0919	3.23	90.267	28.0793	Onshore	Shale & Tight Oil
1583	United States	2015	36.3935	48.709	12.3155	35.5383	4.9	90.267	28.0793	Onshore	Shale & Tight Oil
1584	United States	2015	34.2312	48.709	14.4778	35.9491	1.8	90.267	28.0793	Onshore	Shale & Tight Oil
1585	United States	2015	38.4506	48.709	10.2584	35.9478	3.19	90.267	28.0793	Onshore	Shale & Tight Oil
1586	United States	2015	35.7458	48.709	12.9632	36.0927	4.4	90.267	28.0793	Onshore	Shale & Tight Oil
1587	United States	2015	39.0179	48.709	9.69113	36.0925	5.54	90.267	28.0793	Onshore	Shale & Tight Oil
1588	United States	2015	67.0438	48.709	0	35.9495	2.83	90.267	28.0793	Onshore	Shale & Tight Oil
1589	United States	2015	45.6884	48.709	3.02065	36.2399	3.69	90.267	28.0793	Onshore	Shale & Tight Oil
1590	United States	2015	36.4191	48.709	12.2899	36.0926	3.88	90.267	28.0793	Onshore	Shale & Tight Oil
1591	United States	2015	36.6817	48.709	12.0273	35.6732	1.13	90.267	28.0793	Onshore	Shale & Tight Oil
1592	United States	2015	41.6882	48.709	7.02084	35.949	4.65	90.267	28.0793	Onshore	Shale & Tight Oil
1593	United States	2015	34.0532	48.709	14.6558	37.4925	0.09	90.267	28.0793	Onshore	Shale & Tight Oil
1594	United States	2015	43.4221	48.709	5.28688	36.3936	7.12	90.267	28.0793	Onshore	Shale & Tight Oil
1595	United States	2015	34.8492	48.709	13.8598	35.9506	2.79	90.267	28.0793	Onshore	Shale & Tight Oil
1596	United States	2015	36.4016	48.709	12.3074	36.0916	4.37	90.267	28.0793	Onshore	Shale & Tight Oil
1597	United States	2015	58.0351	48.709	0	35.9503	1.42	90.267	28.0793	Onshore	Shale & Tight Oil
1598	United States	2015	44.3822	48.709	4.32677	35.6722	2.91	90.267	28.0793	Onshore	Shale & Tight Oil
1599	United States	2015	35.3319	48.709	13.3771	35.5386	4.07	90.267	28.0793	Onshore	Shale & Tight Oil
1600	United States	2015	38.957	48.709	9.752	35.5386	3.08	90.267	28.0793	Onshore	Shale & Tight Oil
1601	United States	2015	40.7581	48.709	7.95086	35.4074	4.59	90.267	28.0793	Onshore	Shale & Tight Oil
1602	United States	2015	73.9892	48.709	0	35.2859	0.33	90.267	28.0793	Onshore	Shale & Tight Oil
1603	United States	2015	44.1008	48.709	4.6082	35.3348	0.08	90.267	28.0793	Onshore	Shale & Tight Oil
1604	United States	2015	33.0834	48.709	15.6256	35.2814	1.26	90.267	28.0793	Onshore	Shale & Tight Oil
1605	United States	2015	38.6397	48.709	10.0693	35.6712	1.59	90.267	28.0793	Onshore	Shale & Tight Oil
1606	Canada	2015	39.6003	48.709	9.10872	38.0903	2.83	40.0243	28.0793	Onshore	Shale & Tight Oil
1607	United States	2015	42.6608	48.709	6.04817	37.0441	3.49	90.267	36.4882	Onshore	Other Oil
1608	Canada	2015	36.2984	48.709	12.4106	36.6414	3.38	40.0243	39	Onshore	Shale & Tight Oil
1609	United States	2015	38.9396	48.709	9.76937	35.807	3.15	90.267	28.0793	Onshore	Shale & Tight Oil
1610	United States	2015	37.7687	48.709	10.9403	35.6713	0.35	90.267	28.0793	Onshore	Shale & Tight Oil
1611	United States	2015	40.4436	48.709	8.26541	35.9525	0.86	90.267	28.0793	Onshore	Shale & Tight Oil
1612	United States	2015	40.9608	48.709	7.7482	36.549	6.01	90.267	28.0793	Onshore	Shale & Tight Oil
1613	United States	2015	39.5165	48.709	9.1925	36.2431	2.74	90.267	28.0793	Onshore	Shale & Tight Oil
1614	United States	2015	47.2505	48.709	1.45847	35.2817	11.81	90.267	28.0793	Onshore	Shale & Tight Oil
1615	United States	2015	41.4728	48.709	7.23617	37.0438	18.32	90.267	28.0793	Onshore	Shale & Tight Oil
1616	United States	2015	36.2674	48.709	12.4416	35.2854	1.12	90.267	28.0793	Onshore	Shale & Tight Oil
1617	United States	2015	41.3202	48.709	7.38879	35.8083	6.76	90.267	28.0793	Onshore	Shale & Tight Oil
1618	United States	2015	37.2771	48.709	11.4319	35.5373	1.15	90.267	28.0793	Onshore	Shale & Tight Oil
1619	United States	2015	38.1298	48.709	10.5792	36.2448	0.73	90.267	28.0793	Onshore	Shale & Tight Oil
1620	United States	2015	33.5881	48.709	15.1209	35.4106	1.17	90.267	28.0793	Onshore	Shale & Tight Oil
1621	United States	2015	34.5001	48.709	14.2089	35.5386	5.32	90.267	28.0793	Onshore	Shale & Tight Oil
1622	United States	2015	32.7073	48.709	16.0017	35.2769	0.1	90.267	28.0793	Onshore	Shale & Tight Oil
1623	United States	2015	51.6528	48.709	0	35.5372	0.27	90.267	28.0793	Onshore	Shale & Tight Oil
1624	United States	2015	34.7741	48.709	13.9349	35.409	3.91	90.267	28.0793	Onshore	Shale & Tight Oil
1625	United States	2015	34.4136	48.709	14.2954	35.2798	3.05	90.267	28.0793	Onshore	Shale & Tight Oil
1626	United States	2015	34.4044	48.709	14.3046	35.2823	1.48	90.267	28.0793	Onshore	Shale & Tight Oil
1627	United States	2015	34.0933	48.709	14.6157	35.2806	3.32	90.267	28.0793	Onshore	Shale & Tight Oil
1628	United States	2015	35.796	48.709	12.913	35.2816	5.51	90.267	28.0793	Onshore	Shale & Tight Oil
1629	United States	2015	36.6588	48.709	12.0502	35.4076	14.51	90.267	28.0793	Onshore	Shale & Tight Oil
1630	United States	2015	33.284	48.709	15.425	35.285	1.17	90.267	28.0793	Onshore	Shale & Tight Oil
1631	United States	2015	33.2276	48.709	15.4814	35.5417	1.11	90.267	28.0793	Onshore	Shale & Tight Oil
1632	United States	2015	36.3936	48.709	12.3154	35.4551	0.07	90.267	28.0793	Onshore	Shale & Tight Oil
1633	United States	2015	38.6356	48.709	10.0734	35.5096	0.13	90.267	28.0793	Onshore	Shale & Tight Oil
1634	United States	2015	33.597	48.709	15.112	35.4097	2.96	90.267	28.0793	Onshore	Shale & Tight Oil
1635	United States	2015	33.5103	48.709	15.1987	35.2856	0.43	90.267	28.0793	Onshore	Shale & Tight Oil
1636	United States	2015	32.9863	48.709	15.7227	35.3979	0.84	90.267	28.0793	Onshore	Shale & Tight Oil
1637	United States	2015	32.5588	48.709	16.1502	35.2765	0.14	90.267	28.0793	Onshore	Shale & Tight Oil
1638	United States	2015	32.772	48.709	15.937	35.5289	0.85	90.267	28.0793	Onshore	Shale & Tight Oil
1639	United States	2015	33.1271	48.709	15.5819	35.4097	0.54	90.267	28.0793	Onshore	Shale & Tight Oil
1640	United States	2015	32.9036	48.709	15.8054	35.2811	0.66	90.267	28.0793	Onshore	Shale & Tight Oil
1641	United States	2015	35.3716	48.709	13.3374	35.5415	2.27	90.267	28.0793	Onshore	Shale & Tight Oil
1642	United States	2015	33.1277	48.709	15.5813	35.5387	1.68	90.267	28.0793	Onshore	Shale & Tight Oil
1643	United States	2015	40.3726	48.709	8.33636	35.5379	8.64	90.267	28.0793	Onshore	Shale & Tight Oil
1644	United States	2015	36.045	48.709	12.664	35.6726	4.24	90.267	28.0793	Onshore	Shale & Tight Oil
1645	United States	2015	39.4558	48.709	9.25322	35.4305	0.14	90.267	28.0793	Onshore	Shale & Tight Oil
1646	United States	2015	54.4266	48.709	0	35.6724	4.29	90.267	28.0793	Onshore	Shale & Tight Oil
1647	United States	2015	34.7915	48.709	13.9175	35.5385	3.69	90.267	28.0793	Onshore	Shale & Tight Oil
1648	United States	2015	33.4907	48.709	15.2183	35.2299	0.34	90.267	28.0793	Onshore	Shale & Tight Oil
1649	United States	2015	33.2263	48.709	15.4827	35.2812	0.3	90.267	28.0793	Onshore	Shale & Tight Oil
1650	United States	2015	36.5638	48.709	12.1452	35.5432	0.51	90.267	28.0793	Onshore	Shale & Tight Oil
1651	United States	2015	35.3538	48.709	13.3552	35.4077	0.28	90.267	28.0793	Onshore	Shale & Tight Oil
1652	United States	2015	35.2505	48.709	13.4585	35.5392	1.64	90.267	28.0793	Onshore	Shale & Tight Oil
1653	United States	2015	33.7493	48.709	14.9597	35.4826	1.81	90.267	28.0793	Onshore	Shale & Tight Oil
1654	United States	2015	39.9554	48.709	8.75365	35.5351	1.44	90.267	28.0793	Onshore	Shale & Tight Oil
1655	United States	2015	33.2077	48.709	15.5013	35.41	1.52	90.267	28.0793	Onshore	Shale & Tight Oil
1656	United States	2015	33.0789	48.709	15.6301	35.4093	1.32	90.267	28.0793	Onshore	Shale & Tight Oil
1657	United States	2015	35.6737	48.709	13.0353	35.4062	1.35	90.267	28.0793	Onshore	Shale & Tight Oil
1658	United States	2015	61.5766	48.709	0	35.5409	1.84	90.267	28.0793	Onshore	Shale & Tight Oil
1659	United States	2015	43.5101	48.709	5.19894	35.539	1.74	90.267	28.0793	Onshore	Shale & Tight Oil
1660	United States	2015	33.1306	48.709	15.5784	35.5424	0.55	90.267	28.0793	Onshore	Shale & Tight Oil
1661	United States	2015	33.7055	48.709	15.0035	35.2299	0.26	90.267	28.0793	Onshore	Shale & Tight Oil
1662	United States	2015	33.1294	48.709	15.5796	35.2842	0.63	90.267	28.0793	Onshore	Shale & Tight Oil
1663	United States	2015	36.3827	48.709	12.3263	35.6718	5.05	90.267	28.0793	Onshore	Shale & Tight Oil
1664	United States	2015	35.0052	48.709	13.7038	35.2873	0.97	90.267	28.0793	Onshore	Shale & Tight Oil
1665	United States	2015	34.5395	48.709	14.1695	35.2811	3.75	90.267	28.0793	Onshore	Shale & Tight Oil
1666	United States	2015	37.1043	48.709	11.6047	35.4083	7.23	90.267	28.0793	Onshore	Shale & Tight Oil
1667	United States	2015	33.9048	48.709	14.8042	35.4086	0.95	90.267	28.0793	Onshore	Shale & Tight Oil
1668	United States	2015	34.2716	48.709	14.4374	35.5384	0.88	90.267	28.0793	Onshore	Shale & Tight Oil
1669	United States	2015	33.0559	48.709	15.6531	35.41	1.34	90.267	28.0793	Onshore	Shale & Tight Oil
1670	United States	2015	33.8422	48.709	14.8668	35.6731	1.34	90.267	28.0793	Onshore	Shale & Tight Oil
1671	United States	2015	32.9303	48.709	15.7787	35.4032	0.77	90.267	28.0793	Onshore	Shale & Tight Oil
1672	United States	2015	33.6398	48.709	15.0692	35.2822	1.44	90.267	28.0793	Onshore	Shale & Tight Oil
1673	United States	2015	33.2487	48.709	15.4603	35.2808	0.42	90.267	28.0793	Onshore	Shale & Tight Oil
1674	United States	2015	32.9937	48.709	15.7153	35.4168	0.74	90.267	28.0793	Onshore	Shale & Tight Oil
1675	United States	2015	33.7781	48.709	14.9309	35.2847	3.08	90.267	28.0793	Onshore	Shale & Tight Oil
1676	United States	2015	33.7508	48.709	14.9582	35.2847	3.08	90.267	28.0793	Onshore	Shale & Tight Oil
1677	Iraq	2015	44.9175	48.709	3.79154	68.278	68.91	389.172	24	Onshore	Light & Medium
1678	Iraq	2015	44.3544	48.709	4.35458	50.8723	140.16	277.614	28.45	Onshore	Light & Medium
1679	Venezuela	2015	44.9023	48.709	3.80673	137.858	74.2	343.775	30	Onshore	Light & Medium
1680	Congo	2015	32.6979	48.709	16.0111	158.421	4.02	410.266	21.8	Shallow water	Heavy
1681	Congo	2015	41.7604	48.709	6.94862	55.2829	1.87	410.266	37	Shallow water	Light & Medium
1682	Congo	2015	43.4258	48.709	5.28324	62.6474	0.29	410.266	39	Onshore	Light & Medium
1683	Congo	2015	46.1256	48.709	2.5834	63.5736	0.31	410.266	34	Onshore	Light & Medium
1684	Congo	2015	41.8075	48.709	6.90149	54.3628	0.74	410.266	27.9	Shallow water	Light & Medium
1685	Congo	2015	41.909	48.709	6.8	55.1186	0.03	410.266	34.6	Shallow water	Light & Medium
1686	Congo	2015	43.8176	48.709	4.89135	55.7365	7.96	410.266	39	Onshore	Light & Medium
1687	United States	2015	33.2445	48.709	15.4645	68.3045	0.56	90.267	28.0793	Onshore	Shale & Tight Oil
1688	United States	2015	37.1252	48.709	11.5838	63.7273	6.02	363	28.0793	Onshore	Shale & Tight Oil
1689	United States	2015	35.6943	48.709	13.0147	63.7273	4.33	363	28.0793	Onshore	Shale & Tight Oil
1690	United States	2015	40.4672	48.709	8.24179	63.7273	5.14	363	28.0793	Onshore	Shale & Tight Oil
1691	United States	2015	35.5218	48.709	13.1872	63.7273	3.72	363	28.0793	Onshore	Shale & Tight Oil
1692	United States	2015	41.3925	48.709	7.31654	63.7273	10.6	363	28.0793	Onshore	Shale & Tight Oil
1693	United States	2015	61.913	48.709	0	63.7273	5.59	363	28.0793	Onshore	Shale & Tight Oil
1694	United States	2015	34.8963	48.709	13.8127	63.7273	0.59	363	28.0793	Onshore	Shale & Tight Oil
1695	United States	2015	38.2874	48.709	10.4216	63.7273	3.24	363	28.0793	Onshore	Shale & Tight Oil
1696	United States	2015	37.4424	48.709	11.2666	63.7273	0.36	363	28.0793	Onshore	Shale & Tight Oil
1697	United States	2015	37.4543	48.709	11.2547	63.7273	1.96	363	28.0793	Onshore	Shale & Tight Oil
1698	United States	2015	39.7654	48.709	8.94358	63.7273	2	363	28.0793	Onshore	Shale & Tight Oil
1699	United States	2015	35.2536	48.709	13.4554	63.7273	0.19	363	28.0793	Onshore	Shale & Tight Oil
1700	United States	2015	36.0362	48.709	12.6728	63.7273	0.19	363	28.0793	Onshore	Shale & Tight Oil
1701	United States	2015	50.4305	48.709	0	63.7273	3.08	363	28.0793	Onshore	Shale & Tight Oil
1702	United States	2015	39.5689	48.709	9.14009	63.7273	6.96	363	28.0793	Onshore	Shale & Tight Oil
1703	United States	2015	61.8844	48.709	0	63.7273	7.34	363	28.0793	Onshore	Shale & Tight Oil
1704	United States	2015	38.9923	48.709	9.71668	63.7273	7.94	363	28.0793	Onshore	Shale & Tight Oil
1705	United States	2015	39.3352	48.709	9.37379	63.7273	3.81	363	28.0793	Onshore	Shale & Tight Oil
1706	United States	2015	37.0086	48.709	11.7004	63.7273	5.99	363	28.0793	Onshore	Shale & Tight Oil
1707	United States	2015	63.2441	48.709	0	63.7273	3.08	363	28.0793	Onshore	Shale & Tight Oil
1708	United States	2015	36.3445	48.709	12.3645	63.7273	3.15	363	28.0793	Onshore	Shale & Tight Oil
1709	United States	2015	36.8045	48.709	11.9045	63.7273	8.51	363	28.0793	Onshore	Shale & Tight Oil
1710	United States	2015	34.6292	48.709	14.0798	63.7273	2.98	363	28.0793	Onshore	Shale & Tight Oil
1711	United States	2015	36.3975	48.709	12.3115	63.7273	6.57	363	28.0793	Onshore	Shale & Tight Oil
1712	United States	2015	33.6505	48.709	15.0585	63.7273	1.06	363	28.0793	Onshore	Shale & Tight Oil
1713	United States	2015	42.9734	48.709	5.73561	63.7273	8.95	363	28.0793	Onshore	Shale & Tight Oil
1714	United States	2015	36.0716	48.709	12.6374	63.7273	2.23	363	28.0793	Onshore	Shale & Tight Oil
1715	United States	2015	40.7624	48.709	7.94656	63.7273	0.67	363	28.0793	Onshore	Shale & Tight Oil
1716	United States	2015	35.3613	48.709	13.3477	63.7273	1.01	363	28.0793	Onshore	Shale & Tight Oil
1717	United States	2015	53.8256	48.709	0	63.7273	0.36	363	28.0793	Onshore	Shale & Tight Oil
1718	United States	2015	42.0503	48.709	6.65866	63.7273	4.91	363	28.0793	Onshore	Shale & Tight Oil
1719	United States	2015	40.6205	48.709	8.08851	63.7273	9.38	363	28.0793	Onshore	Shale & Tight Oil
1720	United States	2015	44.8437	48.709	3.86527	63.7273	4.77	363	28.0793	Onshore	Shale & Tight Oil
1721	United States	2015	39.5721	48.709	9.13689	63.7273	2.78	363	28.0793	Onshore	Shale & Tight Oil
1722	United States	2015	40.0385	48.709	8.67046	63.7273	13.43	363	28.0793	Onshore	Shale & Tight Oil
1723	United States	2015	41.5412	48.709	7.16784	63.7273	3.25	363	28.0793	Onshore	Shale & Tight Oil
1724	United States	2015	45.2483	48.709	3.46069	63.7273	14.63	363	28.0793	Onshore	Shale & Tight Oil
1725	United States	2015	58.2398	48.709	0	63.7273	0.76	363	28.0793	Onshore	Shale & Tight Oil
1726	United States	2015	62.4481	48.709	0	63.7273	3.08	363	28.0793	Onshore	Shale & Tight Oil
1727	United States	2015	34.6245	48.709	14.0845	63.7273	0.65	363	28.0793	Onshore	Shale & Tight Oil
1728	United States	2015	42.9332	48.709	5.77578	63.7273	2.49	363	28.0793	Onshore	Shale & Tight Oil
1729	United States	2015	43.3251	48.709	5.38395	63.7273	2.23	363	28.0793	Onshore	Shale & Tight Oil
1730	United States	2015	40.0278	48.709	8.68123	63.7273	4.99	363	28.0793	Onshore	Shale & Tight Oil
1731	United States	2015	35.0072	48.709	13.7018	63.7273	4.46	363	28.0793	Onshore	Shale & Tight Oil
1732	United States	2015	36.4921	48.709	12.2169	63.7273	7.45	363	28.0793	Onshore	Shale & Tight Oil
1733	United States	2015	35.4603	48.709	13.2487	63.7273	3.59	363	28.0793	Onshore	Shale & Tight Oil
1734	United States	2015	39.529	48.709	9.17996	63.7273	4.98	363	28.0793	Onshore	Shale & Tight Oil
1735	United States	2015	37.4399	48.709	11.2691	63.7273	5.42	363	28.0793	Onshore	Shale & Tight Oil
1736	United States	2015	60.926	48.709	0	63.7273	3.07	363	28.0793	Onshore	Shale & Tight Oil
1737	United States	2015	45.9823	48.709	2.72667	63.7273	4.9	363	28.0793	Onshore	Shale & Tight Oil
1738	United States	2015	42.8022	48.709	5.90676	63.7273	8.27	363	28.0793	Onshore	Shale & Tight Oil
1739	United States	2015	36.6775	48.709	12.0315	63.7273	6.43	363	28.0793	Onshore	Shale & Tight Oil
1740	United States	2015	36.4123	48.709	12.2967	63.7273	2.76	363	28.0793	Onshore	Shale & Tight Oil
1741	United States	2015	56.4315	48.709	0	63.7273	1.37	363	28.0793	Onshore	Shale & Tight Oil
1742	United States	2015	34.9124	48.709	13.7966	63.7273	4.04	363	28.0793	Onshore	Shale & Tight Oil
1743	United States	2015	37.7078	48.709	11.0012	63.7273	2.9	363	28.0793	Onshore	Shale & Tight Oil
1744	United States	2015	34.1105	48.709	14.5985	63.7273	0.64	363	28.0793	Onshore	Shale & Tight Oil
1745	United States	2015	43.1582	48.709	5.55082	63.7273	7.62	363	28.0793	Onshore	Shale & Tight Oil
1746	United States	2015	64.4196	48.709	0	63.7273	2.73	363	28.0793	Onshore	Shale & Tight Oil
1747	United States	2015	47.039	48.709	1.66999	63.7273	1.57	363	28.0793	Onshore	Shale & Tight Oil
1748	United States	2015	41.0106	48.709	7.69843	63.7273	1.42	363	28.0793	Onshore	Shale & Tight Oil
1749	United States	2015	47.8976	48.709	0.811425	63.7273	0.88	363	28.0793	Onshore	Shale & Tight Oil
1750	United States	2015	37.246	48.709	11.463	63.7273	2.29	363	28.0793	Onshore	Shale & Tight Oil
1751	United States	2015	44.7783	48.709	3.93073	63.7273	7.49	363	28.0793	Onshore	Shale & Tight Oil
1752	United States	2015	51.9845	48.709	0	63.7273	3.08	363	28.0793	Onshore	Shale & Tight Oil
1753	United States	2015	32.9869	48.709	15.7221	96.1087	0.61	90.267	28.0793	Onshore	Shale & Tight Oil
1754	United States	2015	37.5803	48.709	11.1287	96.1087	2.33	90.267	28.0793	Onshore	Shale & Tight Oil
1755	United States	2015	44.6497	48.709	4.05934	96.1087	7.49	90.267	28.0793	Onshore	Shale & Tight Oil
1756	United States	2015	41.0662	48.709	7.64281	96.1087	7.49	90.267	28.0793	Onshore	Shale & Tight Oil
1757	United States	2015	39.21	48.709	9.49897	96.1087	12.1	90.267	28.0793	Onshore	Shale & Tight Oil
1758	United States	2015	46.7905	48.709	1.91849	96.1087	35	90.267	28.0793	Onshore	Shale & Tight Oil
1759	United States	2015	34.2093	48.709	14.4997	96.1087	2.23	90.267	28.0793	Onshore	Shale & Tight Oil
1760	United States	2015	36.4889	48.709	12.2201	96.1087	6.66	90.267	28.0793	Onshore	Shale & Tight Oil
1761	United States	2015	33.1769	48.709	15.5321	96.1087	1.17	90.267	28.0793	Onshore	Shale & Tight Oil
1762	United States	2015	34.4157	48.709	14.2933	96.1087	0.93	90.267	28.0793	Onshore	Shale & Tight Oil
1763	United States	2015	34.9364	48.709	13.7726	96.1087	1.17	90.267	28.0793	Onshore	Shale & Tight Oil
1764	United States	2015	44.9112	48.709	3.79785	96.1087	1.11	90.267	28.0793	Onshore	Shale & Tight Oil
1765	United States	2015	45.9849	48.709	2.72408	96.1087	0.61	90.267	28.0793	Onshore	Shale & Tight Oil
1766	United States	2015	36.7887	48.709	11.9203	96.1087	0.02	90.267	28.0793	Onshore	Shale & Tight Oil
1767	United States	2015	46.2029	48.709	2.50611	96.1087	0.02	90.267	28.0793	Onshore	Shale & Tight Oil
1768	United States	2015	48.7211	48.709	0	96.1087	0.12	90.267	28.0793	Onshore	Shale & Tight Oil
1769	United States	2015	38.7761	48.709	9.93287	96.1087	6.24	90.267	28.0793	Onshore	Shale & Tight Oil
1770	United States	2015	36.8186	48.709	11.8904	96.1087	4.15	90.267	28.0793	Onshore	Shale & Tight Oil
1771	United States	2015	36.5327	48.709	12.1763	96.1087	9.49	90.267	28.0793	Onshore	Shale & Tight Oil
1772	United States	2015	63.3182	48.709	0	96.1087	4.46	90.267	28.0793	Onshore	Shale & Tight Oil
1773	United States	2015	35.3822	48.709	13.3268	96.1087	6.26	90.267	28.0793	Onshore	Shale & Tight Oil
1774	United States	2015	38.9823	48.709	9.72671	96.1087	1.59	90.267	28.0793	Onshore	Shale & Tight Oil
1775	United States	2015	35.8968	48.709	12.8122	35.6717	3.72	90.267	28.0793	Onshore	Shale & Tight Oil
1776	United States	2015	42.7966	48.709	5.91242	35.547	0.91	90.267	28.0793	Onshore	Shale & Tight Oil
1777	Canada	2015	34.2399	48.709	14.4691	42.5273	0.01	40.0243	21.3	Onshore	Other Oil
1778	Canada	2015	37.9711	48.709	10.7379	42.5273	3.15	40.0243	36.4882	Onshore	Other Oil
1779	Canada	2015	34.6536	48.709	14.0554	42.5273	2.74	40.0243	36.4882	Onshore	Other Oil
1780	Canada	2015	34.079	48.709	14.63	42.5273	0.02	40.0243	36.4882	Onshore	Other Oil
1781	Canada	2015	34.108	48.709	14.601	42.5273	0.04	40.0243	36.4882	Onshore	Other Oil
1782	Canada	2015	35.9504	48.709	12.7586	42.5273	0.8	40.0243	36.4882	Onshore	Other Oil
1783	Canada	2015	34.6726	48.709	14.0364	42.5273	0.2	40.0243	36.4882	Onshore	Other Oil
1784	Canada	2015	29.3449	48.709	19.3641	41.2528	2.83	40.0243	13.5598	Onshore	Extra Heavy
1785	Canada	2015	30.0979	48.709	18.6111	41.2528	2.16	40.0243	13.5598	Onshore	Extra Heavy
1786	Canada	2015	34.2926	48.709	14.4164	42.5273	0.68	40.0243	36.4882	Onshore	Other Oil
1787	Canada	2015	45.6118	48.709	3.09717	42.5273	0.46	40.0243	30.85	Onshore	Light & Medium
1788	Canada	2015	34.2635	48.709	14.4455	42.5273	0.44	40.0243	36.4882	Onshore	Other Oil
1789	Canada	2015	45.8028	48.709	2.90616	42.5273	20.39	40.0243	28.2	Onshore	Light & Medium
1790	Canada	2015	35.2878	48.709	13.4212	42.5273	2.62	40.0243	43.75	Onshore	Other Oil
1791	Canada	2015	28.1036	48.709	20.6054	41.2528	39.34	40.0243	13.5598	Onshore	Extra Heavy
1792	Canada	2015	29.8536	48.709	18.8554	41.2528	7.39	40.0243	13.5598	Onshore	Extra Heavy
1793	Canada	2015	35.8692	48.709	12.8398	42.5273	3.83	40.0243	36.4882	Onshore	Other Oil
1794	Canada	2015	36.9892	48.709	11.7198	42.5273	3.58	40.0243	36.4882	Onshore	Other Oil
1795	Canada	2015	45.0391	48.709	3.66988	42.5273	2.53	40.0243	27.53	Onshore	Light & Medium
1796	Canada	2015	46.3073	48.709	2.4017	42.5273	0.01	40.0243	35	Onshore	Light & Medium
1797	Canada	2015	34.3664	48.709	14.3426	42.5273	1.05	40.0243	36.4882	Onshore	Other Oil
1798	Canada	2015	30.7478	48.709	17.9612	41.2528	9.41	40.0243	14.95	Onshore	Heavy
1799	Canada	2015	40.3421	48.709	8.36689	42.5273	4.53	40.0243	26	Onshore	Light & Medium
1800	Canada	2015	45.2559	48.709	3.45306	42.5273	1.58	40.0243	31.05	Onshore	Light & Medium
1801	Canada	2015	45.0641	48.709	3.64487	42.5273	0.19	40.0243	34.4	Onshore	Light & Medium
1802	Canada	2015	45.1771	48.709	3.53194	42.5273	12.69	40.0243	29.95	Onshore	Light & Medium
1803	Canada	2015	46.1158	48.709	2.59323	42.5273	0.54	40.0243	39.25	Onshore	Light & Medium
1804	Canada	2015	34.2096	48.709	14.4994	42.5273	0.15	40.0243	36.4882	Onshore	Other Oil
1805	Canada	2015	29.4568	48.709	19.2522	41.2528	10.62	40.0243	14.5	Onshore	Extra Heavy
1806	Canada	2015	43.8786	48.709	4.83045	41.2528	0.4	40.0243	20	Onshore	Heavy
1807	Canada	2015	34.1019	48.709	14.6071	42.5273	0.04	40.0243	39.25	Onshore	Other Oil
1808	Canada	2015	34.9205	48.709	13.7885	42.5273	1.75	40.0243	36.4882	Onshore	Other Oil
1809	Canada	2015	36.1986	48.709	12.5104	42.5273	4.57	40.0243	36.4882	Onshore	Other Oil
1810	Canada	2015	35.0094	48.709	13.6996	42.5273	6.12	40.0243	36.4882	Onshore	Other Oil
1811	Canada	2015	34.1095	48.709	14.5995	42.5273	0.01	40.0243	36.4882	Onshore	Other Oil
1812	Canada	2015	45.9285	48.709	2.78048	42.5273	2.23	40.0243	31.6	Onshore	Light & Medium
1813	Canada	2015	35.2056	48.709	13.5034	42.5273	0.07	40.0243	36.4882	Onshore	Other Oil
1814	Canada	2015	46.0965	48.709	2.6125	42.5273	0.49	40.0243	34.55	Onshore	Light & Medium
1815	Canada	2015	37.4025	48.709	11.3065	42.5273	0.56	40.0243	36.4882	Onshore	Other Oil
1816	Canada	2015	29.4737	48.709	19.2353	41.2528	17.67	40.0243	13.3	Onshore	Extra Heavy
1817	Canada	2015	29.3221	48.709	19.3869	41.2528	6.47	40.0243	13.3	Onshore	Extra Heavy
1818	Canada	2015	29.2718	48.709	19.4372	41.2528	14.3	40.0243	13.3	Onshore	Extra Heavy
1819	Canada	2015	35.2036	48.709	13.5054	42.5273	0.07	40.0243	36.4882	Onshore	Other Oil
1820	Canada	2015	46.2354	48.709	2.47358	42.5273	0.74	40.0243	30.05	Onshore	Light & Medium
1821	Canada	2015	34.3328	48.709	14.3762	42.5273	0.05	40.0243	30.2	Onshore	Other Oil
1822	Canada	2015	35.3656	48.709	13.3434	42.5273	4.81	40.0243	36.4882	Onshore	Other Oil
1823	Canada	2015	34.9047	48.709	13.8043	42.5273	4.08	40.0243	36.4882	Onshore	Other Oil
1824	Canada	2015	51.548	48.709	0	42.5273	1.57	40.0243	36.4882	Onshore	Other Oil
1825	Canada	2015	46.3599	48.709	2.34909	42.5273	0.01	40.0243	24.5	Onshore	Light & Medium
1826	Canada	2015	34.0682	48.709	14.6408	42.5273	0.02	40.0243	36.4882	Onshore	Other Oil
1827	Canada	2015	35.1707	48.709	13.5383	42.5273	1.97	40.0243	36.4882	Onshore	Other Oil
1828	Canada	2015	45.983	48.709	2.72604	42.5273	149.85	40.0243	36.4882	Onshore	Other Oil
1829	Canada	2015	35.4363	48.709	13.2727	42.5273	6.15	40.0243	36.4882	Onshore	Other Oil
1830	Canada	2015	35.0535	48.709	13.6555	42.5273	2.23	40.0243	39.4	Onshore	Other Oil
1831	Canada	2015	34.2635	48.709	14.4455	42.5273	0.29	40.0243	36.4882	Onshore	Other Oil
1832	Canada	2015	40.7064	48.709	8.00258	42.5273	0.44	40.0243	36.4882	Onshore	Other Oil
1833	Canada	2015	41.9346	48.709	6.77438	42.5273	0.39	40.0243	36.4882	Onshore	Other Oil
1834	Canada	2015	45.8778	48.709	2.83121	42.5273	5.42	40.0243	31.4	Onshore	Light & Medium
1835	Canada	2015	46.3897	48.709	2.31929	42.5273	0.01	40.0243	27	Onshore	Light & Medium
1836	Canada	2015	34.3342	48.709	14.3748	42.5273	0.3	40.0243	36.4882	Onshore	Other Oil
1837	Canada	2015	36.5349	48.709	12.1741	42.5273	0.07	40.0243	36.4882	Onshore	Other Oil
1838	Canada	2015	35.1941	48.709	13.5149	42.5273	0.29	40.0243	36.4882	Onshore	Other Oil
1839	Canada	2015	45.8896	48.709	2.81936	42.5273	4.21	40.0243	30.9	Onshore	Light & Medium
1840	Canada	2015	34.967	48.709	13.742	42.5273	3.06	40.0243	36.4882	Onshore	Other Oil
1841	Canada	2015	34.5679	48.709	14.1411	42.5273	0.34	40.0243	36.4882	Onshore	Other Oil
1842	Canada	2015	45.2702	48.709	3.43885	42.5273	3.55	40.0243	35	Onshore	Light & Medium
1843	Canada	2015	44.8573	48.709	3.85168	42.5273	1.48	40.0243	28.95	Onshore	Light & Medium
1844	Canada	2015	36.6461	48.709	12.0629	42.5273	5.68	40.0243	30	Onshore	Other Oil
1845	Canada	2015	44.7472	48.709	3.96183	42.5273	0.44	40.0243	33.5	Onshore	Light & Medium
1846	Canada	2015	35.7464	48.709	12.9626	42.5273	0.22	40.0243	36.4882	Onshore	Other Oil
1847	Canada	2015	34.1856	48.709	14.5234	42.5273	0.19	40.0243	36.4882	Onshore	Other Oil
1848	Canada	2015	34.6652	48.709	14.0438	42.5273	1.62	40.0243	36.4882	Onshore	Other Oil
1849	Canada	2015	58.7287	48.709	0	42.5273	1.19	40.0243	36.4882	Onshore	Other Oil
1850	Canada	2015	36.7967	48.709	11.9123	42.5273	0.23	40.0243	36.4882	Onshore	Other Oil
1851	Canada	2015	41.2087	48.709	7.50028	42.5273	3.68	40.0243	36.4882	Onshore	Other Oil
1852	Canada	2015	40.9342	48.709	7.77479	42.5273	1.07	40.0243	36.4882	Onshore	Other Oil
1853	Canada	2015	34.288	48.709	14.421	42.5273	0.2	40.0243	36.4882	Onshore	Other Oil
1854	Egypt	2015	43.0792	48.709	5.62982	55.1043	2.62	378.303	35	Onshore	Light & Medium
1855	Egypt	2015	42.4015	48.709	6.30755	60.7032	3.45	378.303	36	Onshore	Light & Medium
1856	Niger	2015	45.852	48.709	2.85697	58.1895	6.42	366.278	32.5	Onshore	Light & Medium
1857	Egypt	2015	43.9159	48.709	4.79314	58.0664	1.75	378.303	32	Onshore	Light & Medium
1858	Egypt	2015	45.1259	48.709	3.58306	60.2717	2.74	378.303	64	Onshore	Light & Medium
1859	Egypt	2015	41.1649	48.709	7.5441	60.1885	8.74	378.303	40	Onshore	Light & Medium
1860	Egypt	2015	42.5907	48.709	6.11834	60.5933	1.15	378.303	26	Onshore	Light & Medium
1861	Sudan	2015	46.2829	48.709	2.42609	70.4101	3.25	501.968	36.4882	Onshore	Other Oil
1862	Egypt	2015	43.3989	48.709	5.31007	60.5137	0.54	378.303	36	Onshore	Light & Medium
1863	Angola	2015	44.8612	48.709	3.84776	53.4341	0.58	221.742	33	Onshore	Light & Medium
1864	Angola	2015	32.3831	48.709	16.3259	45.2148	10.22	221.742	23.6	Deepwater	Light & Medium
1865	Egypt	2015	45.0151	48.709	3.69386	60.2602	3.16	378.303	36.4882	Onshore	Other Oil
1866	Egypt	2015	43.6089	48.709	5.10009	60.6669	2.74	378.303	33	Onshore	Light & Medium
1867	Egypt	2015	50.5274	48.709	0	60.5003	12.62	378.303	36.4882	Onshore	Other Oil
1868	Egypt	2015	38.8252	48.709	9.88376	54.7714	2.78	378.303	36.4882	Onshore	Other Oil
1869	Angola	2015	41.9254	48.709	6.78356	46.0117	10.18	221.742	36	Shallow water	Light & Medium
1870	Egypt	2015	41.4804	48.709	7.22862	60.0429	1.21	378.303	44	Onshore	Light & Medium
1871	Egypt	2015	45.8035	48.709	2.90553	60.2265	2.85	378.303	46	Onshore	Light & Medium
1872	Egypt	2015	43.4842	48.709	5.22477	49.2363	3.99	261.068	42	Onshore	Light & Medium
1873	Chad	2015	43.2833	48.709	5.42571	52.8989	16.59	294.671	40	Onshore	Light & Medium
1874	Egypt	2015	43.562	48.709	5.14701	60.8584	1.08	378.303	33	Onshore	Light & Medium
1875	Egypt	2015	44.9107	48.709	3.79827	60.3334	0.36	378.303	50	Onshore	Light & Medium
1876	Egypt	2015	42.9953	48.709	5.71367	60.2585	0.29	378.303	36	Onshore	Light & Medium
1877	Egypt	2015	58.1721	48.709	0	60.4382	3.53	378.303	36.4882	Onshore	Other Oil
1878	Egypt	2015	44.9159	48.709	3.79307	55.9589	2.46	344.052	40	Onshore	Light & Medium
1879	Egypt	2015	44.4785	48.709	4.23051	58.8416	0.91	378.303	36.4882	Onshore	Other Oil
1880	China	2015	29.2569	48.709	19.4521	38.9703	26.94	46.593	18	Onshore	Heavy
1881	China	2015	31.0272	48.709	17.6818	37.3035	12.83	46.593	18	Onshore	Heavy
1882	China	2015	44.8862	48.709	3.82275	38.5908	10.95	46.593	35	Onshore	Light & Medium
1883	Thailand	2015	41.7979	48.709	6.91109	30.1898	4.49	86.5335	33	Shallow water	Light & Medium
1884	Indonesia	2015	41.9941	48.709	6.71486	46.3065	12.06	281.909	32	Shallow water	Light & Medium
1885	Indonesia	2015	45.7394	48.709	2.96959	65.3201	9.16	340.765	31	Onshore	Light & Medium
1886	Malaysia	2015	42.0053	48.709	6.7037	61.5033	15.95	476.903	34	Shallow water	Light & Medium
1887	Malaysia	2015	41.9065	48.709	6.8025	67.8284	6.57	519.859	33.5	Shallow water	Light & Medium
1888	Thailand	2015	41.9533	48.709	6.75574	37.4951	9.56	86.5335	42	Shallow water	Light & Medium
1889	China	2015	22.7382	48.709	25.9708	36.8336	76.43	46.593	18	Onshore	Heavy
1890	China	2015	-0.189137	48.709	48.8981	28.2888	1.66	46.593	36.4882	Shallow water	Other Oil
1891	China	2015	41.8714	48.709	6.83755	64.6367	8.03	103.13	36	Shallow water	Light & Medium
1892	China	2015	41.8342	48.709	6.87477	27.5819	5.26	46.593	36	Shallow water	Light & Medium
1893	China	2015	41.9021	48.709	6.80689	30.2734	3.44	46.593	30	Shallow water	Light & Medium
1894	China	2015	39.618	48.709	9.09102	24.0172	2.56	46.593	22	Shallow water	Heavy
1895	China	2015	44.2848	48.709	4.42424	39.0091	16.42	46.593	36	Onshore	Light & Medium
1896	Malaysia	2015	41.9421	48.709	6.76693	62.597	12.41	484.792	37	Shallow water	Light & Medium
1897	China	2015	41.9491	48.709	6.75989	27.6085	27.78	46.593	37	Shallow water	Light & Medium
1898	Malaysia	2015	39.7009	48.709	9.00805	63.9446	20.17	519.859	37	Deepwater	Light & Medium
1899	Malaysia	2015	41.6812	48.709	7.02781	133.008	6.48	180.826	34	Shallow water	Light & Medium
1900	Thailand	2015	41.8069	48.709	6.90207	29.8176	2.42	86.5335	40	Shallow water	Light & Medium
1901	Malaysia	2015	34.8558	48.709	13.8532	63.1639	7.01	519.859	35	Deepwater	Light & Medium
1902	Thailand	2015	41.7267	48.709	6.98226	30.6028	4.74	86.5335	30	Shallow water	Light & Medium
1903	China	2015	41.9245	48.709	6.78448	28.2261	15.34	46.593	35	Shallow water	Light & Medium
1904	China	2015	41.7483	48.709	6.96068	27.274	4.85	46.593	29	Shallow water	Light & Medium
1905	China	2015	42.3776	48.709	6.3314	24.4508	4.67	46.593	22	Shallow water	Heavy
1906	Italy	2015	35.2417	48.709	13.4673	32.4653	6.22	1.6856	36.4882	Onshore	Other Oil
1907	United Kingdom	2015	41.9347	48.709	6.77425	35.4569	0.35	132.431	36	Shallow water	Light & Medium
1908	Chile	2015	45.7802	48.709	2.92882	55.7164	0.59	324.739	55	Onshore	Light & Medium
1909	Venezuela	2015	46.2598	48.709	2.4492	69.097	0.39	343.775	31	Onshore	Light & Medium
1910	Venezuela	2015	46.3845	48.709	2.32454	71.396	0.02	343.775	31	Onshore	Light & Medium
1911	Venezuela	2015	46.1926	48.709	2.51641	101.784	0.15	343.775	43	Onshore	Light & Medium
1912	Venezuela	2015	46.2587	48.709	2.45031	66.5527	1.57	301.813	38	Onshore	Light & Medium
1913	Colombia	2015	41.8767	48.709	6.83228	35.0413	3.1	78.8339	26.5	Onshore	Light & Medium
1914	Colombia	2015	41.933	48.709	6.77596	34.6964	7.36	78.8339	29	Onshore	Light & Medium
1915	Ecuador	2015	28.0665	48.709	20.6425	43.499	12.55	188.305	20	Onshore	Heavy
1916	Venezuela	2015	46.0668	48.709	2.64219	79.0217	3.79	343.775	39	Onshore	Light & Medium
1917	Iraq	2015	46.3614	48.709	2.34759	60.2862	2.19	389.172	26.5	Onshore	Light & Medium
1918	Iraq	2015	37.1868	48.709	11.5222	55.8682	11.12	389.172	17	Onshore	Shale & Tight Oil
1919	Iraq	2015	45.9561	48.709	2.75295	66.1532	1.1	389.172	35	Onshore	Light & Medium
1920	Oman	2015	41.9029	48.709	6.80605	41.6119	1.53	247.215	55	Shallow water	Light & Medium
1921	Mexico	2015	43.12	48.709	5.58896	34.9385	16.62	159.985	19.5	Shallow water	Heavy
1922	Mexico	2015	45.0344	48.709	3.67459	57.5699	3.11	186.833	36	Onshore	Light & Medium
1923	Canada	2015	37.8097	48.709	10.8993	88.9733	29.21	2	36.4882	Onshore	Other Oil
1924	Australia	2015	41.8373	48.709	6.87166	52.0466	1.26	285.797	46.7	Onshore	Light & Medium
1925	Congo	2015	41.8783	48.709	6.83072	55.6665	0.25	410.266	38	Shallow water	Light & Medium
1926	Brunei Darussalam	2015	42.1125	48.709	6.59648	40.4728	32.19	161.058	40	Shallow water	Light & Medium
1927	Brunei Darussalam	2015	45.6978	48.709	3.01121	42.4807	11.68	141.51	28.3	Onshore	Light & Medium
1928	Brunei Darussalam	2015	41.946	48.709	6.76301	36.1371	2.35	161.058	37	Shallow water	Light & Medium
1929	Congo	2015	31.2173	48.709	17.4917	53.5453	15.33	410.266	30	Deepwater	Light & Medium
1930	Malaysia	2015	46.5889	48.709	2.12007	81.8451	31.47	519.859	40	Deepwater	Light & Medium
1931	Canada	2015	41.9537	48.709	6.75526	42.5273	1.88	40.0243	39.9	Shallow water	Light & Medium
1932	United States	2015	41.2707	49.3696	8.09888	52.112	758.801	172.252	28.0793	Onshore	Shale & Tight Oil
1933	United States	2015	35.7903	47.7282	11.9379	84.4808	115.282	45.4746	16.5484	Onshore	Heavy

## Sheet: Country-level data
Country	Count of fields	Sum of production, mmbbl/y	Ave. marginal cost of production, $/bbl	Ave. carbon intensity, kg CO2eq./bbl
Saudi Arabia	15	4167.97	2.84904	28.5339
Russian Federation	151	3575.91	3.66893	48.5902
United States	485	2732.23	8.21212	50.6319
China	65	1518.1	7.42334	36.323
Canada	151	1203.53	7.88344	80.8925
Iran	22	1082.82	3.34203	89.6546
Kuwait	4	1042.68	2.98347	33.1245
Iraq	27	1027.74	3.85226	69.0905
Brazil	34	834.09	6.95229	62.1233
Mexico	19	832.9	11.3711	41.589
Nigeria	73	719.24	5.64893	73.1976
Venezuela	44	626.14	13.0663	106.805
Norway	54	598.76	6.8664	31.2844
United Arab Emirates	8	507.04	5.70575	29.4304
Kazakhstan	35	506.76	5.46491	48.0669
Algeria	20	432.58	3.9001	104.511
Angola	27	372.87	4.70344	43.38
Oman	10	357.04	6.47837	60.7364
Colombia	59	331.41	21.4623	46.9534
United Kingdom	108	283.82	7.7028	46.6849
Indonesia	44	279.48	4.6141	97.5937
Qatar	9	279	5.37481	38.1411
India	11	270.97	5.43573	47.5853
Egypt	64	241.47	6.01632	57.4316
Azerbaijan	10	238.4	5.62556	37.824
Malaysia	29	206.22	9.11856	70.8355
Argentina	44	182.24	5.57422	53.168
Libya	11	141.43	3.46416	72.4023
Ecuador	15	127.09	10.8077	49.3801
Vietnam	14	106.65	6.76972	50.0429
Gabon	38	83.75	6.26926	71.1033
Congo	24	81.74	9.06646	60.1737
Australia	18	78.56	6.86611	41.074
Thailand	14	59.07	6.29681	34.8468
Equatorial Guinea	3	58.02	6.99495	39.0354
South Sudan	1	57.85	4.79487	73.0147
Bahrain	1	54.75	6.54121	30.9782
Denmark	14	53.29	6.76669	28.1565
Sudan	3	51.54	15.11	86.9725
Chad	3	51.02	14.3538	52.5827
Brunei Darussalam	3	46.22	5.69894	40.7598
Turkmenistan	3	40.86	6.21152	90.3363
Ghana	2	37.45	0.833532	33.2496
Italy	4	37.39	7.99819	33.366
Cameroon	9	34.53	11.0147	105.944
Romania	4	27.42	3.60305	39.5752
Peru	8	18.09	10.9879	45.8511
Pakistan	7	17.87	4.64997	60.4391
Trinidad and Tobago	4	17.36	11.2623	62.1875
Germany	9	16.82	9.27307	43.4323
Yemen	7	16.6	2.76114	142.715
Tunisia	17	13.15	4.79543	78.3665
Cote d'Ivoire	3	12.69	10.0339	38.4331
Syria	6	11.27	6.60878	162.115
Papua New Guinea	4	10.21	3.76727	41.7086
Netherlands	7	9.85	7.10874	25.8148
Poland	5	8.71	5.61403	34.5052
Democratic Republic of Congo	2	7.9	5.6978	166.074
Albania	3	7.71	18.0844	141.579
Austria	2	7.43	2.56585	44.123
New Zealand	4	6.48	6.74595	42.7872
Niger	1	6.42	2.85697	58.1895
Suriname	1	6.19	20.7683	43.6376
France	9	5.43	3.01132	37.3637
Croatia	4	4.04	2.66806	38.6059
Hungary	1	4.03	2.5316	43.117
Philippines	3	2.4	6.96606	64.8555
Uzbekistan	2	2.28	2.56526	143.109
Mauritania	1	1.85	0.1552	87.5673
Spain	5	1.64	3.37621	27.5339
Turkey	3	1.48	5.83537	37.2619
Ukraine	3	1.08	4.44882	62.282
Greece	1	0.84	6.76555	35.5534
Afghanistan	1	0.59	3.00735	42.3083
Chile	1	0.59	2.92882	55.7164
Georgia	2	0.45	2.94382	88.336
Bulgaria	1	0.06	2.36638	48.118
Grand Total	1933	25901.6	5.85907	51.8588

## Sheet: Data coverage
Row Labels	Coverage %
Russian Federation	0.95554
Saudi Arabia	1
United States	0.797848
China	0.972295
Iraq	0.696093
Canada	0.896717
Iran	0.923309
United Arab Emirates	0.441077
Kuwait	1
Venezuela	0.686181
Brazil	0.93753
Mexico	0.991064
Nigeria	0.907588
Angola	0.950447
Kazakhstan	0.83989
Norway	1
Qatar	0.510269
Algeria	0.829357
Colombia	0.905242
Oman	0.99615
United Kingdom	0.872286
Azerbaijan	0.769795
Indonesia	0.974467
India	0.97548
Egypt	0.968629
Malaysia	0.863658
Ecuador	0.641127
Argentina	0.93809
Libya	0.800623
Vietnam	0.876292
Australia	0.667749
Equatorial Guinea	0.635836
Thailand	0.652116
Turkmenistan	0.46055
Congo	0.939059
Gabon	1
Denmark	0.934002
South Sudan	1
Chad	1
Brunei	1
Sudan	1
Ghana	1
Italy	1
Cameroon	0.965334
Pakistan	0.542699
Romania	0.90888
Trinidad and Tobago	0.604678
Uzbekistan	0.103882
Peru	0.854396
Papua New Guinea	0.486468
Bahrain	1
Turkey	0.0835875
Germany	0.958787
Yemen	0.955451
New Zealand	0.430022
Tunisia	1
Ukraine	0.0823934
Syria	1
Cote d'Ivoire	1
Netherlands	0.98836
Philippines	0.272572
Albania	1
Democratic Republic of Congo	1
Poland	1
Suriname	0.997583
France	0.892358
Austria	1
Niger	1
Croatia	0.891242
Hungary	0.920091
Chile	0.258206
Mauritania	0.966057
Spain	0.965842
Greece	1
Bulgaria	0.164384
Georgia	1
Grand Total	0.88936
